# Supplementary material
Source: publisher figshare collection journal article supplement (https://acs.figshare.com/ndownloader/files/14732414)
Supplement: Supplementary file 1 [file 14732414]

## Sheet: 工作表1
Table S-4: List of the exogenous HNE-modified peptides quantified by SiLAP strategy.
Replicate	run 1	run 2	run 3	run 4	run 1	run 2	run 3	run 4	run 1	run 2	run 3	run 4	run 1	run 2	run 3	run 4	run 1	run 2	run 3	run 4
Seq-Pro-Mod	127/126	127/126	127/126	127/126	128/126	128/126	128/126	128/126	129/126	129/126	129/126	129/126	130/126	130/126	130/126	130/126	131/126	131/126	131/126	131/126
ADPDGPEAQAEAcSGER-J3QSY4-C13zsw-TMT	0.0315	1.258	1.115	0.0315	0.0315	1.077	0.752	0.0315	0.0315	1.392	0.834	0.0315	0.0315	0.945	0.634	0.0315	0.0315	1.173	1.014	0.0315
SQIhDIVLVGGSTR-P11142-H4zsw-TMT	1.138	0.995	0.942	0.834	1.13	1.139	1.186	1.167	1.205	1.085	1.265	1.174	1.672	1.013	1.501	1.272	1.701	1.027	1.382	1.617
IIPGFMcQGGDFTR-A8K486-C7zsw-TMT	1.244	1.317	0.0315	1.138	0.954	0.829	0.0315	0.859	0.604	0.723	0.0315	0.594	1.319	1.121	0.0315	1.036	1.057	1.002	0.0315	0.81
VSVVDLTcR-P04406-C8zsw-TMT	0.927	0.0315	1.09	1.143	0.697	0.0315	0.695	0.624	0.525	0.0315	0.586	0.541	1.277	0.0315	1.385	1.346	1	0.0315	1.048	1.113
SEcLNNIGDSSPLIR-Q92973-C3zsw-TMT	1.039	1.078	0.0315	1.106	1.017	0.869	0.0315	0.922	1.263	1.154	0.0315	1.372	1.084	0.944	0.0315	1.151	0.978	0.815	0.0315	1.069
VIMVTGDhPITAK-P05023-H8zsw-TMT	0.967	0.991	1.112	0.764	1.243	1.283	1.412	0.937	1.566	1.46	1.655	0.778	1.143	1.067	1.197	0.468	1.234	1.16	1.27	1.092
VPTANVSVVDLTcR-P04406-C13zsw-TMT	0.924	1.095	1.176	1.001	0.785	0.91	0.806	0.873	0.905	1.084	1.058	0.986	2.424	2.29	2.683	2.677	2.159	2.203	2.347	2.584
hQYYNQEWTLWDR-P22314-H1zsw-TMT	0.89	0.923	0.875	0.795	0.794	0.835	0.913	0.822	0.832	0.795	0.91	0.833	1.188	1.114	1.172	1.033	0.772	0.882	0.981	0.685
AhTMTDDVTFWK-Q00610-H2zsw-TMT	0.726	0.0315	0.0315	0.705	0.946	0.0315	0.0315	0.869	0.819	0.0315	0.0315	0.913	0.946	0.0315	0.0315	0.827	0.916	0.0315	0.0315	0.538
LMcPQEIVDYIADK-O14561-C3zsw-TMT	0.874	0.91	0.937	0.751	0.991	0.963	0.847	1.042	1.015	1.012	1.148	1.044	0.895	0.905	0.886	0.864	1.135	0.96	1.039	0.832
GAGTDEGcLIEILASR-Q6P452-C8zsw-TMT	1.139	1.139	1.163	0.982	0.993	1.018	0.946	0.801	0.897	0.916	0.894	0.582	0.879	0.944	0.914	0.531	0.775	0.786	0.831	0.797
ScVEEPEPEPEAAEGDGDK-B2RDE8-C2zsw-TMT	0.0315	0.0315	0.777	0.786	0.0315	0.0315	1.223	1.17	0.0315	0.0315	0.855	0.604	0.0315	0.0315	0.869	0.786	0.0315	0.0315	1.109	1.148
PAVTQhAPYFK-P30048-H6zsw-TMT	1.037	1.06	0.0315	0.0315	0.922	1.001	0.0315	0.0315	1.063	1.094	0.0315	0.0315	0.816	0.629	0.0315	0.0315	1.026	0.902	0.0315	0.0315
VIhDNFGIVEGLmTTVH-P04406-H3zsw-TMT M13Oxidation	0.934	0.87	0.979	1.237	1.057	0.812	0.773	0.918	1.029	0.937	0.838	0.871	0.873	0.887	0.902	1.108	0.763	0.82	0.852	0.927
TQTVcNFTDGALVQHQEWDGK-Q01469-C5zsw-TMT	0.871	1.095	0.0315	0.0315	0.882	0.891	0.0315	0.0315	0.998	1.239	0.0315	0.0315	1.163	1.26	0.0315	0.0315	0.893	0.934	0.0315	0.0315
VLIFDDSFEhEVWQDASSFR-Q12797-H10zsw-TMT	1.184	0.0315	1.243	1.026	0.774	0.0315	0.737	0.887	0.732	0.0315	0.676	0.961	1.099	0.0315	0.884	1.11	0.916	0.0315	0.806	0.907
GIGMNEPLVDcEGYPR-F5H5V4-C11zsw-TMT	1.107	0.883	0.0315	0.0315	0.761	1.026	0.0315	0.0315	1.089	1.659	0.0315	0.0315	0.913	1.26	0.0315	0.0315	0.987	0.989	0.0315	0.0315
FWEVISDEHGIDPTGTYhGDSDLQLDR-P07437-H18zsw-TMT	0.737	0.809	0.0315	0.859	1.252	1.314	0.0315	1.498	1.03	1.151	0.0315	1.346	1.08	1.062	0.0315	1.359	1.999	1.806	0.0315	1.864
TADGIVShLK-P30101-H8zsw-TMT	1.107	1.071	0.984	0.924	1.099	1.275	1.449	1.091	1.171	1.367	1.565	0.975	0.968	0.859	0.98	1.121	0.933	1.09	1.434	1.064
SLEDPQThANR-P07900-H8zsw-TMT	0.9	0.944	0.816	0.94	1.119	1.059	1.065	1.182	1.146	1.14	1.119	1.133	1.353	1.494	1.609	1.367	1.383	1.474	1.334	1.541
VFhGNESLWK-Q13268-H3zsw-TMT	0.895	0.953	0.914	1.181	1.075	0.69	1.007	1.03	3.864	3.569	3.648	3.847	0.567	0.426	0.618	0.698	1.048	0.785	1.061	1.031
GEMMDLQhGSLFLQTPK-P07195-H8zsw-TMT	1.017	1.183	0.913	0.897	0.509	0.483	0.458	0.669	0.59	0.681	0.55	0.628	0.78	1.246	1.11	1.31	0.793	1.234	0.993	0.966
ADFDNTVAIhPTSSEELVTLR-P00390-H10zsw-TMT	0.893	0.839	0.853	1.027	0.949	0.849	0.996	1.021	0.955	0.902	0.814	1.007	0.901	0.706	0.711	0.822	1.1	0.924	1.145	1.205
TAYPVIScPPLTPDWGVQDVWSSLR-D6RF62-C8zsw-TMT	1.547	1.038	1.179	1.209	0.808	0.951	0.672	0.942	0.891	0.583	0.753	1.021	1.195	1.463	1.553	1.296	1.466	0.893	1.327	1.358
EAGFPPGVVNIVPGYGPTAGAAISShMDIDK-P00352-H26zsw-TMT	1.226	1.118	1.153	1.117	0.785	0.621	0.694	0.69	0.741	0.671	0.701	0.764	0.665	0.481	0.594	0.576	0.678	0.507	0.527	0.509
ALNVEPDGTGLTcSLAPN-V9HW35-C13zsw-TMT	0.0315	1.275	1.186	0.827	0.0315	1.434	1.106	1.251	0.0315	1.384	1.152	1.004	0.0315	1.51	0.893	0.862	0.0315	1.676	1.969	1.259
hGIPTAQWK-C9JZG2-H1zsw-TMT	0.961	0.0315	0.756	1.001	0.884	0.0315	0.998	0.999	0.776	0.0315	0.826	1.044	0.775	0.0315	0.861	0.907	0.737	0.0315	0.794	0.998
TVIGDhGDELFSVF-P23141-H6zsw-TMT	0.0315	0.0315	1.22	1.046	0.0315	0.0315	0.85	0.844	0.0315	0.0315	0.953	0.906	0.0315	0.0315	1.024	0.837	0.0315	0.0315	0.82	0.72
SHFEQWGTLTDcVVMR-F8W6I7-C12zsw-TMT	1.001	0.975	0.836	1.179	0.763	0.833	0.709	0.917	0.942	0.958	0.862	1.084	0.898	0.938	0.97	0.98	0.924	0.655	0.655	0.916
cDENILWLDYK-P14618-C1zsw-TMT	1.006	0.996	1.112	1.039	0.826	1.02	0.743	0.679	0.8	1.284	0.865	0.839	0.942	1.117	1.008	0.99	0.76	0.759	0.676	0.685
FLSQPFQVAEVFTGhMGK-P06576-H15zsw-TMT	1.132	1.024	1.027	0.989	1.04	1.178	0.986	1.021	1.155	1.208	1.071	1.13	1.051	1.068	0.867	0.967	0.77	0.81	0.811	0.821
VcNPIITK-P11142-C2zsw-TMT	0.937	0.0315	0.967	0.962	1	0.0315	0.937	0.883	1.364	0.0315	0.99	0.962	1.042	0.0315	0.963	0.944	1.047	0.0315	0.86	0.829
IhPTSVISGYR-P17987-H2zsw-TMT	0.65	0.0315	0.604	0.627	1.32	0.0315	1.303	1.381	1.036	0.0315	1.065	1.223	0.993	0.0315	0.877	0.909	0.829	0.0315	0.807	1.11
ELhINLIPNK-P07900-H3zsw-TMT	0.894	0.9	0.874	0.915	1.096	1.08	0.989	0.964	1.451	1.286	1.246	1.12	1.221	1.191	1.252	1.249	1.259	1.025	1.035	1
VIQNEFTVGEEcELETMTGEK-P07148-C12zsw-TMT	0.889	0.0315	0.941	1.132	1.286	0.0315	1.409	1.734	1.298	0.0315	1.34	1.815	1.376	0.0315	1.452	1.326	0.976	0.0315	1.032	0.892
AcNVLQSShLEDYPFNAEY-O60218-C2Carboxymethyl H9zsw-TMT	0.972	1.159	0.0315	0.921	0.316	0.557	0.0315	0.428	0.423	0.596	0.0315	0.494	0.437	0.691	0.0315	0.587	0.413	0.644	0.0315	0.481
SNFLNcYVSGFHPSDIEVDLLK-P61769-C6zsw-TMT	1.053	1.016	1.096	1.167	0.907	0.894	0.959	0.851	0.757	0.72	0.781	0.885	0.975	0.812	0.833	0.883	1.051	0.982	0.864	1.128
VIhDNFGIVEGLMTTVH-P04406-H3zsw-TMT	1.387	1.242	1.23	1.02	0.623	0.618	0.703	0.677	0.649	0.564	0.782	0.547	1.188	1.366	0.914	1.021	0.866	1.196	0.86	0.788
WSWEDWSDcLSQDPESPKPK-Q09161-C9zsw-TMT	0.0315	0.0315	1.029	1.098	0.0315	0.0315	0.73	0.684	0.0315	0.0315	0.979	0.706	0.0315	0.0315	0.964	0.889	0.0315	0.0315	0.75	0.563
LIDLhSPSEIVK-P60866-H5zsw-TMT	0.0315	0.913	0.858	0.88	0.0315	1.085	0.909	0.911	0.0315	1.243	0.613	0.642	0.0315	1.379	0.695	0.797	0.0315	1.264	0.606	0.729
PGQFIHTNWTGhGGTVSSSSYNA-P52209-H12zsw-TMT	0.872	1.215	0.0315	0.889	0.44	0.534	0.0315	0.653	0.554	0.62	0.0315	0.723	0.663	0.657	0.0315	0.664	0.572	0.828	0.0315	0.777
hAAENPGK-Q00839-H1zsw-TMT	1.028	0.854	0.809	1.2	1.49	1.46	1.227	1.164	2.96	2.729	2.608	2.287	1.892	1.584	1.618	1.725	1.951	1.852	1.989	1.765
SSILLDVKPWDDETDMAQLEAcVR-E9PK01-C22zsw-TMT	0.728	0.797	0.0315	0.0315	0.704	0.794	0.0315	0.0315	0.475	0.582	0.0315	0.0315	0.841	0.896	0.0315	0.0315	0.907	1.009	0.0315	0.0315
GFcFITFK-A0A024RDF4-C3zsw-TMT	1.008	0.0315	1.051	0.0315	1.033	0.0315	1.03	0.0315	0.972	0.0315	0.966	0.0315	0.995	0.0315	1.117	0.0315	0.831	0.0315	0.936	0.0315
EKDILTAIAADLcK-J3QRD1-C13zsw-TMT	0.0315	0.0315	1.218	1.262	0.0315	0.0315	0.732	0.929	0.0315	0.0315	0.955	0.877	0.0315	0.0315	1.223	1.184	0.0315	0.0315	0.987	0.965
AIMPGQSYGLEDGScSYK-Q6NTA2-C15zsw-TMT	0.857	1.115	0.969	0.994	1.335	1.271	1.149	1.304	1.124	1.046	0.839	0.812	0.797	0.84	0.875	0.723	0.906	0.912	0.868	0.803
FTQDTQPhYIYSPR-Q14204-H8zsw-TMT	0.754	0.0315	0.0315	0.749	1.216	0.0315	0.0315	1.132	1.43	0.0315	0.0315	1.179	1.068	0.0315	0.0315	0.925	1.101	0.0315	0.0315	1.267
LALVTGGEIASTFDhPELVK-P78371-H15zsw-TMT	0.932	0.895	0.931	0.913	0.862	0.887	1.03	0.979	0.921	0.754	0.913	0.89	1.135	1.052	1.215	1.198	0.902	1.045	1.008	0.808
YETNLTFVGcVGMLDPPR-P16615-C10zsw-TMT	1.234	0.0315	1	1.172	0.792	0.0315	0.594	0.631	0.885	0.0315	0.77	0.921	0.907	0.0315	0.731	0.729	0.86	0.0315	0.642	0.756
TVYGGGcSEMLMAhAVTQLANR-P78371-C7Carboxymethyl H14zsw-TMT	0.754	0.834	1.308	0.0315	1.078	1.247	1.199	0.0315	1.154	1.625	1.223	0.0315	1.277	1.371	1.189	0.0315	1.076	1.58	1.172	0.0315
GLcAIAQAESLR-P23396-C3zsw-TMT	1.095	1.091	0.921	1.024	0.912	0.81	0.888	0.97	0.972	0.985	1.07	0.919	0.863	0.901	1.008	0.955	0.752	0.729	0.849	0.758
SSVPVSVVSDSYDIYNAcEK-P43490-C18zsw-TMT	1.154	1.089	1.259	1.108	0.726	0.583	0.561	0.696	0.82	0.666	0.802	0.803	0.959	0.68	0.789	0.962	0.843	0.609	0.664	0.862
AATFGLILDDVSLThLTFGK-P35232-H15zsw-TMT	1.292	1.166	0.0315	0.0315	1.134	1.019	0.0315	0.0315	1.127	0.797	0.0315	0.0315	1.027	1.021	0.0315	0.0315	1.071	0.853	0.0315	0.0315
GYAFVTFcTK-Q05CK9-C8zsw-TMT	1.038	0.992	0.0315	0.0315	0.742	0.75	0.0315	0.0315	0.727	0.715	0.0315	0.0315	1.152	0.969	0.0315	0.0315	0.727	0.779	0.0315	0.0315
ScVEEPEPEPEAAEGDGDKK-P51858-C2zsw-TMT	0.735	0.615	0.0315	0.0315	1.086	1.021	0.0315	0.0315	0.57	0.698	0.0315	0.0315	0.744	0.65	0.0315	0.0315	1.143	0.914	0.0315	0.0315
TQLGAIYIDAScLTWEGQQFQGK-P61970-C12zsw-TMT	0.0315	0.817	0.0315	1.007	0.0315	0.881	0.0315	0.7	0.0315	1.071	0.0315	0.82	0.0315	0.935	0.0315	0.702	0.0315	0.866	0.0315	0.811
FVINYDYPNSSEDYIhR-B4DN41-H16zsw-TMT	0.936	0.939	0.802	0.792	0.954	0.776	1.012	0.912	1.083	0.991	1.123	0.974	1.288	0.995	1.26	1.401	0.945	0.846	0.868	1.066
FLhQDIDSGQGIR-Q59EZ3-H3zsw-TMT	0.0315	0.941	0.992	0.961	0.0315	1.395	1.426	1.535	0.0315	1.308	1.2	1.183	0.0315	1.097	1.057	1.084	0.0315	1.264	1.296	1.164
AhSSMVGVNLPQK-P00558-H2zsw-TMT	0.99	1.137	0.943	0.0315	0.898	1.026	0.913	0.0315	0.995	1.043	0.974	0.0315	0.744	0.891	0.93	0.0315	0.883	0.975	0.843	0.0315
ISSIQSIVPALEIANAhR-B3GQS7-H17zsw-TMT	0.962	0.893	0.918	0.805	1.141	1.094	1.26	1.317	1.383	1.609	1.637	1.873	0.986	0.871	1.133	0.956	0.925	0.734	0.874	0.868
hNEETGDNVGPLIIK-Q9NZ45-H1zsw-TMT	1.084	1.22	1.098	1.036	1.047	1.024	1.063	1.057	1.459	1.545	1.484	1.331	0.926	1.109	1.033	1.056	1.49	1.635	1.667	1.523
SYIEGYVPSQADVAVFEAVSSPPPADLcH-P24534-C28zsw-TMT	1.122	0.979	1.099	1.071	0.996	0.942	0.826	0.945	0.65	0.59	0.683	0.674	0.713	0.766	0.681	0.748	1.153	1.065	1.002	1.278
VFIMDScDELIPEYLNFIR-P08238-C7zsw-TMT	0.823	0.629	0.716	0.749	1.65	1.375	1.28	1.343	1.025	0.973	0.899	1.079	1.331	0.985	1.046	1.16	0.998	1.134	0.928	1.084
FhGNESLWK-Q13268-H2zsw-TMT	0.93	0.0315	1.235	0.0315	1.152	0.0315	1.256	0.0315	1.702	0.0315	1.542	0.0315	0.749	0.0315	0.86	0.0315	0.721	0.0315	1.114	0.0315
SFDVNKPGcEVDDLK-P41091-C9zsw-TMT	0.922	0.964	0.958	0.913	1.375	1.171	1.438	1.314	1.604	1.265	1.393	1.367	1.524	1.192	1.412	1.422	1.475	1.324	1.364	1.174
TcTTVAFTQVNSEDK-P62424-C2zsw-TMT	0.0315	0.994	0.0315	1.132	0.0315	0.977	0.0315	0.743	0.0315	1.131	0.0315	1.02	0.0315	1.075	0.0315	1.297	0.0315	1.326	0.0315	1.069
GNEcFQK-A8K690-C4zsw-TMT	0.55	0.0315	0.0315	1.104	0.465	0.0315	0.0315	1.241	0.0315	0.0315	0.0315	1.034	0.0315	0.0315	0.0315	1.088	0.252	0.0315	0.0315	1.48
GHQQLYWShPR-P62273-H9zsw-TMT	1.172	1.052	0.0315	1.001	1.244	1.274	0.0315	1.284	1.425	1.289	0.0315	1.355	1.251	1.259	0.0315	1.379	1.054	0.927	0.0315	0.941
MVNhFIAEFK-P11142-H4zsw-TMT	0.927	0.889	1.011	0.872	0.995	1.075	1.195	1.046	1.008	1.182	1.129	1.004	1.018	1.262	1.079	1.064	0.764	1.21	1.052	0.871
VhVIFNYK-P27797-H2zsw-TMT	0.898	0.0315	0.892	0.878	1.512	0.0315	1.35	1.5	1.821	0.0315	1.479	2.005	1.181	0.0315	1.08	1.291	1.312	0.0315	1.024	1.325
hFIDVGAGVIDEDYR-A0A0C4DGL3-H1zsw-TMT	1.129	0.791	0.0315	0.0315	0.79	0.739	0.0315	0.0315	0.876	0.794	0.0315	0.0315	1.672	1.261	0.0315	0.0315	1.124	1.177	0.0315	0.0315
EVIYLTEPVDEYcIQALPEFDGK-Q5CAQ5-C13zsw-TMT	0.655	1.417	1.048	0.0315	1.562	1.374	1.468	0.0315	1.165	1.268	0.983	0.0315	1.061	1.119	0.964	0.0315	1.328	1.472	1.292	0.0315
TLhPDLGTDKDK-P00338-H3zsw-TMT	0.972	0.933	1.268	1.022	0.939	1.117	1.176	1.119	1.047	1.077	1.141	1.031	0.841	0.917	0.952	0.885	1.123	1.555	1.772	1.443
ADhGEPIGR-P08238-H3zsw-TMT	0.59	0.0315	1.359	0.783	0.984	0.0315	1.431	0.967	0.846	0.0315	2.136	1.118	1.442	0.0315	2.261	1.631	1.485	0.0315	3.562	2.361
ATIAGGGVIPhIhK-P0C0S5-H11zsw-TMT H13zsw-TMT	0.878	0.875	0.768	0.885	1.269	1.416	1.174	1.319	1.155	1.495	1.199	1.261	1.07	1.24	1.19	1.201	0.938	1.066	0.829	0.857
HPSKPDPSGEcNPDLR-Q09028-C11zsw-TMT	1.276	0.0315	1.329	0.822	1.532	0.0315	1.559	1.588	1.485	0.0315	1.509	1.514	1.136	0.0315	1.333	1.056	1.568	0.0315	1.327	1.418
NIELIcQENEGENDPVLQR-Q15691-C6zsw-TMT	1.259	1.216	0.0315	0.0315	0.939	0.909	0.0315	0.0315	1.179	1.089	0.0315	0.0315	1.089	0.99	0.0315	0.0315	1.206	1.174	0.0315	0.0315
MILEIMhK-Q9NZI8-H7zsw-TMT	1.144	0.0315	1.188	0.0315	1.046	0.0315	1.078	0.0315	0.899	0.0315	1.018	0.0315	1.078	0.0315	1.343	0.0315	0.917	0.0315	1.084	0.0315
hILGFDTGDAVLNEAAQILR-Q5RLJ0-H1zsw-TMT	0.969	1.034	1.114	1.112	1.057	1.031	1.157	0.893	0.821	0.955	0.893	0.915	1.052	1.004	1.152	0.905	1.012	1.121	1.22	0.972
hLQLFEELR-P14618-H1zsw-TMT	1.621	1.41	1.571	1.407	0.698	0.678	0.762	0.68	0.902	0.71	0.882	0.879	0.905	0.793	0.83	0.883	1.225	1.148	1.23	1.053
YVDIAIPcNNK-C9J9K3-C8zsw-TMT	1.041	0.822	0.873	0.903	0.948	0.795	0.909	0.924	0.948	0.888	0.961	0.915	0.804	0.824	0.82	0.809	0.673	1.213	0.717	0.761
EELEQTYhAK-P20700-H8zsw-TMT	0.985	0.949	0.863	0.885	1.401	1.144	1.239	1.438	1.361	1.326	1.396	2.021	1.052	0.922	1.003	0.986	1.15	0.936	1.113	1.199
AIEPPPLDAVIEAEhTLR-Q08211-H15zsw-TMT	0.0315	1.026	0.975	0.932	0.0315	0.854	0.935	1.097	0.0315	1.066	1.119	1.104	0.0315	1.06	1.179	1.004	0.0315	0.887	0.836	0.854
AVVDGGAIPAFISLLASPhAH-A8K7D9-H19zsw-TMT	1.119	1.366	1.359	0.999	0.971	0.89	0.86	0.805	0.868	0.765	1.066	0.869	1.547	1.439	1.796	1.615	1.019	0.968	0.959	0.935
LcYVALDFEQEmATAASSSSLEK-Q8WVW5-C2zsw-TMT M12Oxidation	0.0315	0.0315	0.999	0.975	0.0315	0.0315	0.895	0.958	0.0315	0.0315	0.787	0.951	0.0315	0.0315	0.984	0.892	0.0315	0.0315	0.892	1.012
SYcNDQSTGDIK-P00492-C3zsw-TMT	1.017	1.003	0.0315	0.0315	1.162	1.199	0.0315	0.0315	0.954	1.111	0.0315	0.0315	1.125	1.179	0.0315	0.0315	1.032	1.096	0.0315	0.0315
EhPWEVMPDLY-C9J9K3-H2zsw-TMT	1.275	1.157	1.158	0.0315	1.106	1.047	1.073	0.0315	1.011	0.982	0.91	0.0315	0.827	0.986	1.005	0.0315	1.131	1.147	1.173	0.0315
NEcLEAGTLFQDPSFPAIPSALGFK-B2RCM3-C3zsw-TMT	1.401	1.076	0.963	1.087	1.174	0.765	0.711	0.836	0.687	0.699	0.541	0.789	0.829	0.855	0.752	0.746	1.249	1.095	1.015	0.918
GAVEALAAALAhISGATSVDQR-Q9NR30-H12zsw-TMT	1.294	0.942	0.964	0.0315	0.912	0.963	0.995	0.0315	1.039	0.963	0.889	0.0315	1.205	1.163	1.339	0.0315	1.012	0.902	0.839	0.0315
GIhPTIISESFQK-B7Z9L0-H3zsw-TMT	1.103	1.082	0.986	0.986	1.183	1.39	1.161	1.209	1.235	1.279	1.146	1.113	1.078	1.104	1.01	1.279	1.197	1.23	1.112	1.165
ESTLEAIGYIcQDIDPEQLQDK-B2RBR9-C11zsw-TMT	1.198	0.952	1.062	0.923	1.282	1.088	1.126	1.005	0.929	0.852	0.815	0.912	0.915	0.839	0.838	0.789	1.736	1.222	1.228	1.141
EFGATEcINPQDFSK-P11766-C7zsw-TMT	0.0315	0.0315	1.132	1.059	0.0315	0.0315	1.045	1.31	0.0315	0.0315	1.31	1.299	0.0315	0.0315	1.058	0.927	0.0315	0.0315	1.199	0.731
ALYEhLTAK-P42704-H5zsw-TMT	0.0315	0.785	0.801	0.0315	0.0315	1.37	1.332	0.0315	0.0315	1.693	1.428	0.0315	0.0315	0.844	1.022	0.0315	0.0315	1.216	1.105	0.0315
VYNVTQhAVGIVVNK-P46778-H7zsw-TMT	0.0315	0.0315	1.046	0.937	0.0315	0.0315	0.935	1.144	0.0315	0.0315	0.952	1.15	0.0315	0.0315	1.088	1.189	0.0315	0.0315	1.018	1.308
VTEDENDEPIEIPSEDDGTVLLSTVTAQFPGAcGLR-B1AKP7-C33zsw-TMT	0.0315	0.654	0.639	0.0315	0.0315	1.059	1.085	0.0315	0.0315	0.73	0.669	0.0315	0.0315	0.692	0.634	0.0315	0.0315	0.708	1.374	0.0315
TDDYLDQPcYETINR-P50395-C9zsw-TMT	0.0315	0.0315	1.187	1.141	0.0315	0.0315	0.952	0.837	0.0315	0.0315	1.191	1.057	0.0315	0.0315	1.424	1.333	0.0315	0.0315	1.118	0.989
hIMGQNVADYMR-B3KTM6-H1zsw-TMT	1.062	0.0315	1.067	1.02	0.981	0.0315	1.057	1.019	0.981	0.0315	1.032	0.988	0.99	0.0315	1.095	0.94	0.974	0.0315	1.052	1.099
LTLYDIAhTPGVAADLSHIETK-Q75MT9-H8zsw-TMT	0.909	0.0315	1.075	0.0315	1.063	0.0315	1.305	0.0315	0.792	0.0315	1.233	0.0315	0.626	0.0315	1.09	0.0315	0.462	0.0315	0.986	0.0315
VFIMDNcEELIPEYLN-P07900-C7zsw-TMT	0.957	0.859	0.798	1.013	1.106	1.1	1.155	1	0.731	0.864	0.637	0.688	1.557	1.78	1.854	1.495	1.332	1.26	1.681	1.353
IFhVNWFR-Q16822-H3zsw-TMT	0.0315	1.024	0.915	0.91	0.0315	1.046	0.86	0.89	0.0315	1.675	1.818	2.176	0.0315	0.813	0.948	0.886	0.0315	0.726	0.832	0.906
IGDLQAFQGhGAGNLAGLK-B4E2Z3-H10zsw-TMT	0.99	1.137	1.055	0.0315	0.806	0.0315	0.619	0.0315	1.397	0.0315	1.632	0.0315	0.994	0.0315	0.651	0.0315	1.59	0.0315	1.268	0.0315
ADhQPLTEASYVNLPTIALcNTDSPLR-C9J9K3-H3zsw-TMT C20zsw-TMT	1.246	1.077	0.924	1.101	1.123	1.353	1.09	1.031	1.105	1.103	0.916	1.229	1.162	1.347	1.007	1.037	1.188	1.061	0.878	0.859
hTAAPTDPADGPV-Q04941-H1zsw-TMT	0.782	1.018	0.886	0.864	0.915	0.94	0.889	0.876	0.843	1.039	0.959	0.899	0.874	1.096	1.116	0.998	0.921	1.026	1.008	1.059
EGSGIGAIDSNLDWSHNFTNMLGYTDhQFTELTR-B4DJV2-H27zsw-TMT	0.0315	0.0315	0.859	1.061	0.0315	0.0315	0.849	1.172	0.0315	0.0315	0.46	0.56	0.0315	0.0315	0.592	0.682	0.0315	0.0315	0.521	0.728
AhFNLDESGVLSLDR-B7Z766-H2zsw-TMT	0.0315	1.046	0.0315	1.016	0.0315	1.167	0.0315	1.108	0.0315	1.34	0.0315	1.286	0.0315	1.048	0.0315	0.967	0.0315	0.885	0.0315	0.831
TVALVTDNAVYhWSMEGESQPVK-Q00610-H12zsw-TMT	0.0315	0.871	0.826	0.798	0.0315	0.928	1.084	1.312	0.0315	1.07	1.21	1.287	0.0315	1.017	0.966	0.856	0.0315	1.106	0.898	1.013
YLQDLLAWVEENQhR-Q15149-H14zsw-TMT	0.869	0.0315	1.075	0.904	0.698	0.0315	0.607	0.528	0.502	0.0315	0.609	0.531	0.72	0.0315	0.81	0.714	0.537	0.0315	0.788	0.638
GIFPVLcK-P14618-C7zsw-TMT	0.0315	0.999	1.304	0.0315	0.0315	0.744	0.533	0.0315	0.0315	0.682	0.554	0.0315	0.0315	0.926	0.88	0.0315	0.0315	0.849	0.696	0.0315
ATAPVPTVGEGYGYGhESELSQASAAAR-E9PB51-H16zsw-TMT	0.0315	0.0315	1.14	1.988	0.0315	0.0315	2.032	1.823	0.0315	0.0315	1.799	1.498	0.0315	0.0315	1.212	1.434	0.0315	0.0315	1.372	1.631
NIIhGSDSVK-Q32Q12-H4zsw-TMT	1.136	0.954	0.955	0.895	1.014	1.091	1.213	0.88	0.92	1.404	1.178	1.16	0.859	0.879	1.096	1.074	1.219	1.504	1.56	1.396
LWcNSHRPELVR-Q04828-C3zsw-TMT	0.0315	1.728	0.0315	1.687	0.0315	0.421	0.0315	0.464	0.0315	0.975	0.0315	1.037	0.0315	0.427	0.0315	0.46	0.0315	0.504	0.0315	0.575
DGFIDKEDLhDMLASLGK-P19105-H10zsw-TMT	1.141	0.0315	0.961	0.0315	0.791	0.0315	0.711	0.0315	1.087	0.0315	1.143	0.0315	1.003	0.0315	1.096	0.0315	0.776	0.0315	0.828	0.0315
IcEPGYSPTYK-B4DMY4-C2zsw-TMT	0.807	1.06	0.0315	0.0315	0.869	0.887	0.0315	0.0315	0.812	0.994	0.0315	0.0315	0.588	0.673	0.0315	0.0315	0.685	0.78	0.0315	0.0315
WLSTSIPEAQWhSSLAR-A0A0U1RQF0-H12zsw-TMT	1.017	0.882	0.96	0.0315	0.9	0.79	0.841	0.0315	0.933	1.018	1.076	0.0315	1.134	1.271	1.224	0.0315	0.875	0.784	0.866	0.0315
AVQGMLDFDYVcSR-A0A024R1Y2-C12zsw-TMT	0.937	0.0315	1	0.0315	0.72	0.0315	0.747	0.0315	0.897	0.0315	1.441	0.0315	1.098	0.0315	1.133	0.0315	0.739	0.0315	0.986	0.0315
IQHPSNVLhFF-Q6NTA2-H9zsw-TMT	0.0315	0.0315	1.014	0.997	0.0315	0.0315	0.941	0.998	0.0315	0.0315	1.094	0.853	0.0315	0.0315	1.21	1.341	0.0315	0.0315	0.888	0.86
TVFAEHISDEcK-P39023-C11zsw-TMT	0.761	0.0315	1.06	0.914	0.948	0.0315	1.188	0.989	0.704	0.0315	0.941	0.739	0.814	0.0315	1.175	1.038	0.731	0.0315	0.895	1.029
YGETANEcGEAFFFYGK-P49321-C8zsw-TMT	0.0315	0.809	1.004	1.044	0.0315	0.959	1.231	0.907	0.0315	0.884	1.065	1.046	0.0315	0.788	0.752	1.04	0.0315	0.769	0.985	0.894
YQIDPDAcFSAK-P21796-C8zsw-TMT	0.0315	0.926	0.874	1.061	0.0315	0.985	0.963	1.184	0.0315	1.011	1.064	1.136	0.0315	0.973	0.947	1.279	0.0315	0.841	0.762	1.017
QVhPDTGISSK-A8K9J7-H3zsw-TMT	0.904	0.892	0.888	0.96	1.577	1.679	1.659	1.842	2.937	2.78	3.01	2.545	0.871	1.102	1.042	1.166	1.115	1.544	1.498	1.527
DGNASGTTLLEALDcILPPTR-P68104-C15zsw-TMT	0.0315	0.0315	1.325	1.713	0.0315	0.0315	0.659	0.636	0.0315	0.0315	0.506	0.621	0.0315	0.0315	1.204	1.153	0.0315	0.0315	1.128	1.146
TYLLDGScMVEESGTLESQLEATK-Q13813-C8zsw-TMT	1.121	0.911	1.172	0.972	1.206	1.17	1.257	1.144	0.821	0.819	0.872	1.004	1.128	0.974	0.753	0.909	1.124	0.892	0.849	1.03
APPWVPAMGFTLAPSLGcFVGSR-Q8N730-C18zsw-TMT	1.447	0.0315	0.0315	1.199	1.548	0.0315	0.0315	0.612	0.617	0.0315	0.0315	0.42	1.332	0.0315	0.0315	0.956	1.33	0.0315	0.0315	1.006
AcLISLGYDVENDR-O43707-C2zsw-TMT	1.192	1.123	1.301	1.346	0.774	0.732	0.744	0.679	0.889	0.832	0.888	0.73	1.122	1.053	0.958	1.164	0.91	0.891	0.84	0.838
cIESLIAVFQK-P31949-C1zsw-TMT	0.977	0.987	0.887	0.91	0.774	0.723	0.675	0.681	0.738	0.7	0.726	0.688	1.037	0.987	1.032	0.967	0.894	0.842	0.95	0.92
YFLVGAGAIGcELLK-P22314-C11zsw-TMT	1.076	1.184	0.0315	1.013	0.734	0.7	0.0315	0.691	0.766	0.666	0.0315	0.885	1.04	0.993	0.0315	0.876	0.763	0.731	0.0315	0.815
GFGFVYFQNhDAADK-Q13151-H10zsw-TMT	0.0315	0.0315	0.895	0.942	0.0315	0.0315	0.593	1.114	0.0315	0.0315	0.942	1.264	0.0315	0.0315	0.829	1.078	0.0315	0.0315	0.742	0.839
GWGVMVShR-P06733-H8zsw-TMT	0.914	0.0315	0.979	0.965	0.868	0.0315	0.898	0.966	0.901	0.0315	0.977	1.003	1.308	0.0315	1.504	1.422	0.991	0.0315	1.126	1.017
STYSPLPDDYNcNVELALTSDGR-S4R360-C12zsw-TMT	1.012	0.0315	0.0315	1.118	1.139	0.0315	0.0315	1.24	0.941	0.0315	0.0315	1.134	1.071	0.0315	0.0315	0.911	1.225	0.0315	0.0315	1.33
LVAIVDPhIK-Q14697-H8zsw-TMT	0.906	0.0315	1	0.863	0.834	0.0315	1.073	0.971	0.884	0.0315	0.903	0.824	0.648	0.0315	0.715	0.671	0.664	0.0315	0.852	0.85
FhHTFSTEIAK-P13667-H2zsw-TMT	1.109	0.798	0.0315	0.97	1.444	1.326	0.0315	1.732	1.492	1.199	0.0315	1.477	1.187	0.79	0.0315	1.376	1.309	1.084	0.0315	1.361
FQNVADLhLYLYSAK-A0A090N8G0-H8zsw-TMT	1.054	0.0315	0.776	0.0315	0.859	0.0315	0.828	0.0315	1.089	0.0315	0.809	0.0315	1.196	0.0315	1.04	0.0315	1.179	0.0315	1.011	0.0315
DGVADVSIEDSVISLSGDhCIIGR-P00441-H19zsw-TMT	0.859	1.102	0.0315	0.0315	0.895	0.832	0.0315	0.0315	0.763	0.859	0.0315	0.0315	0.961	0.85	0.0315	0.0315	1.592	1.305	0.0315	0.0315
AVSELAGhQTSAESWGTGR-B4DMJ6-H8zsw-TMT	0.878	0.715	0.0315	0.0315	1.206	1.827	0.0315	0.0315	1.061	1.166	0.0315	0.0315	1.12	1.53	0.0315	0.0315	1.397	1.603	0.0315	0.0315
GDVAEGDLIEhFSQFGTVEK-Q13151-H11zsw-TMT	1.065	0.703	0.906	0.878	1.422	1.048	1.287	1.368	1.626	0.832	1.451	1.53	1.229	0.599	0.902	0.863	1.247	1.097	1.049	1.041
FcIWTESAFR-P36578-C2zsw-TMT	0.0315	0.0315	1.113	1.13	0.0315	0.0315	0.85	0.887	0.0315	0.0315	0.805	0.879	0.0315	0.0315	1.046	1.049	0.0315	0.0315	0.93	0.92
GTEAGQVGEPGIPTGEAGPScSSASDK-B4DDC8-C21zsw-TMT	1.276	0.992	0.74	0.998	1.058	1.175	1.151	1.561	1.318	1.181	1.097	1.453	1.271	0.834	1.245	1.292	1.578	1.371	1.101	1.286
YLPDTLLLEEcGLLR-B8XPJ7-C11zsw-TMT	1.279	1.152	1.257	1.111	1.165	1.114	1.26	1.228	1.059	1.001	1.155	1.179	0.96	0.971	0.934	0.916	1.019	1.008	1.195	1.019
GFGHIGIAVPDVYSAcK-Q04760-C16zsw-TMT	0.981	0.968	0.881	1.006	0.809	0.811	0.732	0.738	0.738	0.924	0.911	0.805	0.926	1.221	1.078	1.28	0.725	0.743	0.523	0.605
YhTSQSGDEmTSLSEYVSR-P08238-H2zsw-TMT M10Oxidation	0.805	0.994	0.747	0.92	1.167	1.226	1.139	0.876	1.187	1.336	1.387	1.216	1.698	1.148	1.365	1.1	1.061	1	0.821	1.251
KhLEINPDHPIVETLR-P08238-H2zsw-TMT	0.0315	0.914	0.0315	0.919	0.0315	0.938	0.0315	1.069	0.0315	1.493	0.0315	1.626	0.0315	0.911	0.0315	0.878	0.0315	1.024	0.0315	1.058
VHSPSGAVEEcHVSELEPDK-O75369-C11zsw-TMT	0.875	0.79	0.0315	0.0315	1.132	1.177	0.0315	0.0315	0.882	0.746	0.0315	0.0315	0.992	0.93	0.0315	0.0315	1.173	1.112	0.0315	0.0315
VhPVSTMIK-P00338-H2zsw-TMT	1.079	1.256	1.459	0.658	0.653	1.174	1.294	0.808	0.448	1.232	1.306	1.638	0.259	0.742	0.987	1.326	0.416	2.564	2.353	2.097
GQVcLPVISAENWK-P68036-C4zsw-TMT	0.979	0.0315	0.0315	1.144	0.75	0.0315	0.0315	0.875	0.752	0.0315	0.0315	0.805	0.978	0.0315	0.0315	1.118	0.819	0.0315	0.0315	0.877
VTYcPTEPGNYIINIK-Q5HY54-C4zsw-TMT	0.857	0.0315	0.867	0.913	0.777	0.0315	0.841	0.918	0.961	0.0315	0.987	1.097	1.23	0.0315	1.159	1.052	1.014	0.0315	1.027	1.011
WLhGLESQIQSDDYGK-D6W5C0-H3zsw-TMT	0.909	0.765	0.0315	0.953	1.212	1.375	0.0315	1.42	1.039	1.422	0.0315	1.297	0.893	0.919	0.0315	1.066	0.957	1.515	0.0315	1.155
ILhDDEVTVTEDK-Q6FG99-H3zsw-TMT	0.863	0.813	0.0315	0.0315	1.33	1.238	0.0315	0.0315	1.279	1.659	0.0315	0.0315	0.909	0.992	0.0315	0.0315	1.088	1.261	0.0315	0.0315
GVGISVLEMShR-Q9Y617-H11zsw-TMT	1.087	0.0315	0.939	0.0315	1.037	0.0315	0.967	0.0315	1.137	0.0315	1.064	0.0315	1.013	0.0315	1.085	0.0315	0.877	0.0315	0.871	0.0315
TDNAGDQHGGGGGGGGGAGAAGGGGGGENYDDPhK-Q6NTA2-H34zsw-TMT	0.0315	0.0315	0.0315	0.0315	0.0315	4.942	4.441	0.0315	0.0315	4.52	4.379	0.0315	0.0315	2.988	2.402	0.0315	0.0315	3.619	0.0315	0.0315
IGhPAPNFK-Q06830-H3zsw-TMT	0.925	1.006	0.898	0.88	1.311	0.998	1.59	1.406	1.951	1.228	2.317	2.087	1.044	0.782	1.138	1.407	3.021	1.611	2.43	2.802
hIDCAhVYQNENEVGVAIQEK-P15121-H1zsw-TMT H6zsw-TMT	1.177	1.02	1.156	1.218	0.596	0.382	0.529	0.488	0.744	0.505	0.694	0.619	0.72	0.528	0.655	0.693	0.908	0.767	0.952	0.812
WFLTcINQPQFR-P26641-C5zsw-TMT	1.254	1.37	1.394	1.389	0.775	0.822	0.75	0.713	0.827	0.826	0.602	0.709	1.208	1.305	1.271	1.255	0.935	0.877	0.889	0.913
ANPQVGVAFPhIK-P13010-H11zsw-TMT	0.0315	0.675	0.896	0.839	0.0315	1.068	1.241	1.159	0.0315	0.68	0.908	0.814	0.0315	0.834	0.976	0.779	0.0315	0.658	0.979	0.946
LVEALcAEHQINLIK-P25398-C6zsw-TMT	0.0315	1.181	1.207	0.9	0.0315	1.089	1.195	0.878	0.0315	1.04	1.263	0.985	0.0315	1.068	1.319	1.015	0.0315	0.984	1.2	0.779
EELAQFhR-P16435-H7zsw-TMT	0.999	1.003	0.956	0.879	1.057	0.979	1.106	1.059	1.245	1.031	1.29	1.152	0.837	0.689	0.932	0.697	0.989	0.777	1.026	0.86
AEPEDhYFLLTEPPLNTPENR-B4DXW1-H6zsw-TMT	0.0315	0.947	1.109	0.981	0.0315	0.819	0.87	0.88	0.0315	0.882	1.21	1.092	0.0315	1.147	1.36	1.281	0.0315	1.117	1.125	0.868
DAhLLVESK-P42704-H3zsw-TMT	0.703	0.912	0.864	0.0315	1.518	1.646	1.656	0.0315	1.417	1.365	1.772	0.0315	0.829	0.831	0.742	0.0315	0.907	1.028	1.261	0.0315
IAVYScPFDGMITETK-P50990-C6zsw-TMT	1.042	1.094	1.024	0.872	0.808	0.93	0.856	0.798	0.816	0.95	0.844	0.943	0.924	1.177	0.917	0.968	0.877	0.982	0.898	0.79
ALVLDcHYPEDEVGQEDEAESDIF-Q07021-C6zsw-TMT	1.647	0.0315	1.787	0.0315	1.055	0.0315	1.198	0.0315	1.081	0.0315	1	0.0315	1.117	0.0315	0.769	0.0315	2.757	0.0315	2.415	0.0315
HVGDLGNVTADKDGVADVSIEDSVISLSGDhCIIGR-P00441-H31zsw-TMT	0.844	0.0315	0.0315	0.962	0.837	0.0315	0.0315	0.672	0.764	0.0315	0.0315	0.733	0.911	0.0315	0.0315	1.009	1.233	0.0315	0.0315	0.968
FSDhVALLSVFQAWDDAR-Q08211-H4zsw-TMT	1.173	0.781	0.971	1.011	1.107	1.078	1.06	0.732	1.073	1.066	1.001	0.872	1.17	0.934	1.256	0.784	0.891	0.864	0.792	0.782
KhPDASVNFSEFSK-P09429-H2zsw-TMT	0.834	0.903	0.0315	0.993	1.011	1.367	0.0315	1.213	0.87	1.439	0.0315	1.391	0.703	1.103	0.0315	1.093	0.786	1.142	0.0315	1.044
YNYhLDSSGSYVFENTVATVM-P49588-H4zsw-TMT	0.0315	1.169	0.0315	1.05	0.0315	1.145	0.0315	1.069	0.0315	1.315	0.0315	1.247	0.0315	1.244	0.0315	1.296	0.0315	1.227	0.0315	0.933
ELGEYGFhEYTEVK-P00352-H8zsw-TMT	0.915	0.922	0.877	0.936	1.062	1.017	0.888	0.983	0.773	0.881	0.609	0.72	0.459	0.492	0.414	0.53	0.565	0.6	0.43	0.621
SIcDTSNFSDYIR-P22314-C3zsw-TMT	1.005	0.0315	0.0315	0.983	0.743	0.0315	0.0315	0.818	0.826	0.0315	0.0315	0.972	1.073	0.0315	0.0315	1.034	0.764	0.0315	0.0315	0.826
MSSFGDFVALSDVcDVPTAK-B2R7P8-C14zsw-TMT	1.15	1.085	1.158	1.372	1.081	0.992	1.216	1.132	1.009	0.842	1.064	0.97	0.943	0.919	0.955	1.01	1.004	0.964	0.957	1.118
IGLSVSEVIEGYEIAcR-P50990-C16zsw-TMT	1.069	0.972	1.121	1.154	1.11	1.033	0.983	1.042	0.655	0.691	0.848	0.814	1.121	1.139	0.868	0.93	0.91	1.12	0.906	1.022
SINPLGGFVhYGEVTNDFVMLK-P39023-H10zsw-TMT	1.228	0.0315	0.991	1.167	0.815	0.0315	0.879	1.054	0.881	0.0315	0.891	0.909	1.2	0.0315	0.902	0.93	1.135	0.0315	0.903	0.907
GcEVVVSGK-P23396-C2zsw-TMT	1.133	0.0315	1.034	0.906	1.652	0.0315	1.542	1.724	1.309	0.0315	1.134	1.323	1.034	0.0315	1.435	1.086	1.425	0.0315	1.337	1.376
GFGFVTFDDhDPVDK-P22626-H10zsw-TMT	0.655	0.0315	0.787	0.0315	1.231	0.0315	1.206	0.0315	0.961	0.0315	1.173	0.0315	0.802	0.0315	1.081	0.0315	0.896	0.0315	0.912	0.0315
HPHDIIDDINSGAVEcPAS-P30050-C16zsw-TMT	1.011	1.138	0.996	1.007	0.719	0.853	0.814	0.836	1.002	1.015	1.069	1.036	1.043	1.093	1.084	1.193	0.842	0.985	0.925	0.961
ESLNASIVDAINQAADcWGIR-Q9UJZ1-C17zsw-TMT	0.0315	0.0315	0.942	0.691	0.0315	0.0315	1.532	1.356	0.0315	0.0315	0.934	0.927	0.0315	0.0315	1.264	0.765	0.0315	0.0315	0.934	0.582
SEPDDSDPFSFDGPEIMGcTGcQIDWK-F8VY35-C19zsw-TMT C22Carboxymethyl	0.642	0.796	1.094	0.0315	0.908	1.197	1.028	0.0315	0.493	1.226	0.699	0.0315	0.837	0.742	0.68	0.0315	0.847	1.066	1.173	0.0315
NTNDANScQIIIPQNQVNR-P50395-C8zsw-TMT	0.0315	0.0315	1.12	0.847	0.0315	0.0315	1.212	0.921	0.0315	0.0315	1.295	1.004	0.0315	0.0315	1.349	1.065	0.0315	0.0315	1.209	0.967
NVcLPPEMEVALTEDQVPALK-P27816-C3zsw-TMT	1.021	1.002	1.141	0.898	0.941	1.014	0.898	1.061	1.033	0.903	0.823	0.928	1.155	1.184	1.093	0.988	1.051	1.362	1.258	1.377
GFAFVTFDDhDSVDK-F8W6I7-H10zsw-TMT	0.676	0.942	0.0315	0.894	1.191	0.88	0.0315	1.039	1.483	1.183	0.0315	0.956	0.954	1.105	0.0315	1.021	1.212	1.183	0.0315	0.975
GQYISPFhDIPIYADK-Q15181-H8zsw-TMT	1.279	0.981	1.013	0.831	0.956	0.84	0.871	0.82	1.083	0.913	0.84	1.042	1.641	1.424	1.482	1.31	1.327	1.157	1.189	1.024
YNEDLELEDAIhTAILTLK-P25787-H12zsw-TMT	0.888	0.805	0.878	0.887	0.947	0.958	1.044	1.064	0.778	0.659	0.809	0.707	1.003	0.944	0.767	1.01	0.946	0.733	1.038	0.99
LcLISTFLEDGIR-Q5T8U5-C2zsw-TMT	0.0315	0.0315	1.121	1.296	0.0315	0.0315	1.124	1.474	0.0315	0.0315	0.992	1.063	0.0315	0.0315	1.174	1.891	0.0315	0.0315	1.092	1.28
cVESFSDYPPLGR-P68104-C1zsw-TMT	0.0315	1.092	0.965	0.852	0.0315	1.027	0.842	0.979	0.0315	0.966	0.942	0.816	0.0315	1.076	1.055	1.147	0.0315	0.88	0.922	0.962
EhPWEVMPDLYFYR-C9J9K3-H2zsw-TMT	0.887	0.732	0.542	0.788	1.194	1.223	0.916	1.02	0.933	0.87	1.018	0.926	1.295	1.192	1.186	1.229	0.708	0.63	0.606	0.586
LDhVVTIIK-E9PKG1-H3zsw-TMT	0.799	0.0315	0.689	1.036	1.428	0.0315	1.496	1.421	1.23	0.0315	1.331	1.098	0.909	0.0315	1.145	1.055	1.196	0.0315	1.269	1.38
SELhIENLNMEADPGQYR-B4DY23-H4zsw-TMT	0.0315	0.77	0.0315	0.949	0.0315	1.421	0.0315	1.163	0.0315	2.236	0.0315	1.675	0.0315	1.098	0.0315	1.068	0.0315	1.47	0.0315	1.097
TThFVEGGDAGNREDQINR-P18124-H3zsw-TMT	1.132	0.0315	0.0315	0.94	1.629	0.0315	0.0315	1.364	0.902	0.0315	0.0315	0.843	1.673	0.0315	0.0315	1.34	1.301	0.0315	0.0315	1.358
hSEAATAQR-H0Y8G5-H1zsw-TMT	0.0315	0.889	0.0315	0.776	0.0315	1.052	0.0315	1.06	0.0315	0.935	0.0315	0.865	0.0315	0.664	0.0315	1.21	0.0315	0.838	0.0315	1.069
SGETEDTFIADLVVGLcTGQIK-P06733-C17zsw-TMT	1.349	1.306	1.539	0.656	1.675	1.274	1.452	0.851	1.184	0.859	0.996	0.689	1.106	1.078	1.169	0.901	1.503	1.3	1.204	1.037
YQVFFFGThETAFLGPK-P51858-H9zsw-TMT	0.935	1.032	0.0315	0.0315	0.822	0.663	0.0315	0.0315	0.832	0.83	0.0315	0.0315	1.022	1.002	0.0315	0.0315	0.794	0.786	0.0315	0.0315
VNcVVPGIIK-Q13268-C3zsw-TMT	1.043	0.0315	0.913	0.991	0.761	0.0315	0.664	0.789	0.88	0.0315	0.965	1.241	0.722	0.0315	0.787	0.855	0.604	0.0315	0.731	0.753
IIEVVDAIMTTAQShQR-Q01813-H15zsw-TMT	1.111	0.0315	1.283	0.0315	0.863	0.0315	0.805	0.0315	0.906	0.0315	1.235	0.0315	1.181	0.0315	1.189	0.0315	0.741	0.0315	1.012	0.0315
GYDYGPhFQGILEASLEGDSGR-A0A0U1RQF0-H7zsw-TMT	1.167	1.084	1.059	1.204	0.895	0.845	0.853	0.934	1.247	1.13	1.187	1.243	1.356	1.194	1.259	1.076	0.933	0.797	1.024	0.986
VNQAIWLLcTGAR-M0R0F0-C9zsw-TMT	1.142	1.093	1.112	1.149	0.835	0.821	0.741	0.828	0.627	0.913	0.825	0.854	1.201	1.249	1.11	1.236	0.63	0.793	0.939	0.838
SAFPFELLhTPEK-P07099-H9zsw-TMT	1.036	1.118	1.092	1.157	0.755	0.799	0.761	0.84	0.78	0.871	0.697	0.964	1.013	0.97	1.064	1.098	0.761	0.859	1.001	1.032
KEEQEVQATLESEEVDLNAGLhGNWTLENAK-Q08211-H22zsw-TMT	0.0315	0.75	0.939	1.136	0.0315	0.796	1.058	0.976	0.0315	0.91	0.896	1.104	0.0315	1.017	0.852	0.971	0.0315	0.875	0.75	1.245
LQGEGLSVAGIVCh-Q13268-H14zsw-TMT	0.0315	0.936	1.248	0.991	0.0315	0.809	0.956	0.838	0.0315	1.613	1.791	1.322	0.0315	0.967	0.95	0.923	0.0315	0.886	0.948	0.766
hSQFIGYPITLFVEK-P07900-H1zsw-TMT	1.044	0.952	1.044	0.944	0.856	0.743	0.741	0.725	0.916	0.739	0.687	0.767	1.167	1.238	1.184	1.179	0.733	0.692	0.744	0.72
ADIEVAcYGYEGIDAVK-P05198-C7zsw-TMT	1.209	0.974	0.941	0.934	0.818	0.852	0.755	0.77	0.968	0.908	0.81	0.868	0.89	0.898	0.856	0.839	1.046	0.954	0.814	0.955
QLVENTDETYcINNEALYDIcFR-B7Z4N1-C11Carboxymethyl C21zsw-TMT	1.025	0.881	0.778	0.0315	1.429	1.313	0.845	0.0315	0.918	0.952	0.717	0.0315	1.301	1.114	0.805	0.0315	1.819	1.792	1.281	0.0315
VScLGVTDDGMAVATGSWDSFLK-E7EP32-C3zsw-TMT	1.219	0.0315	0.0315	0.791	0.944	0.0315	0.0315	0.866	0.702	0.0315	0.0315	0.631	0.859	0.0315	0.0315	0.57	1.13	0.0315	0.0315	0.531
DTAPVLEGLKEEEITKEEIDILSDAcSK-D3DVQ1-C26zsw-TMT	0.0315	0.0315	1.466	1.48	0.0315	0.0315	1.148	1.022	0.0315	0.0315	0.985	1.041	0.0315	0.0315	1.017	0.969	0.0315	0.0315	1.014	1.01
YcAQDAFFQVK-Q13011-C2zsw-TMT	1.036	0.0315	0.0315	1.005	0.91	0.0315	0.0315	0.735	0.924	0.0315	0.0315	0.768	0.88	0.0315	0.0315	0.764	0.873	0.0315	0.0315	0.648
KDGNASGTTLLEALDcILPPTRPTDK-P68104-C16zsw-TMT	0.0315	0.0315	1.297	1.336	0.0315	0.0315	0.654	0.774	0.0315	0.0315	0.659	0.801	0.0315	0.0315	1.075	0.981	0.0315	0.0315	0.725	0.787
RhEILQWVLQTDSQQ-Q96AG4-H2zsw-TMT	0.0315	1.045	0.0315	0.963	0.0315	0.912	0.0315	0.963	0.0315	0.969	0.0315	1.278	0.0315	1.064	0.0315	1.054	0.0315	0.905	0.0315	0.85
SIFQhIQSAQSQR-Q9Y2W1-H5zsw-TMT	1.064	0.788	0.909	1.206	1.221	1.255	1.416	1.528	1.537	1.464	1.56	1.638	1.711	1.324	1.448	1.626	1.36	1.413	1.39	1.733
NELhNLLDKPQLQGIPVLVLGNK-B4DQT8-H4zsw-TMT	1.046	1.254	0.989	1.034	0.876	0.679	0.593	0.832	0.787	0.816	0.682	0.762	0.93	0.98	0.925	0.878	0.75	0.712	0.709	0.759
NYSWMDIITIcK-Q9BV57-C11zsw-TMT	1.149	1.185	1.24	1.071	0.873	1.07	1.121	0.983	0.779	0.978	1.086	1.143	1.052	1.285	1.208	1.34	0.923	1.073	1.174	1.102
IEYNDQNDGScDVK-O75369-C11zsw-TMT	0.837	1.071	0.956	1.102	0.654	1.094	0.953	1.165	0.448	0.962	0.833	1.002	0.461	1.001	1.002	0.973	0.987	1.109	1.333	1.122
VLcELADLQDK-P17987-C3zsw-TMT	1.178	1.062	0.929	1.089	0.94	0.781	0.887	0.992	1.157	1.032	0.937	1.083	1.173	1.028	1.024	1.111	1.085	0.674	0.812	0.912
SDSFENPVLQQhFR-P12956-H12zsw-TMT	0.881	0.944	0.875	0.813	1.574	1.463	1.324	1.418	1.424	1.487	1.336	1.58	1.081	1.113	1.078	1.168	1.004	1.17	1.044	1.059
NVALLSQLYhSPAR-Q15717-H10zsw-TMT	0.0315	0.539	0.0315	0.844	0.0315	0.874	0.0315	1.114	0.0315	0.944	0.0315	1.313	0.0315	1.052	0.0315	0.826	0.0315	0.561	0.0315	0.771
WVDPNSPVLLEDPVLcAL-A0A0A0MSS8-C16zsw-TMT	0.0315	1.507	0.0315	1.282	0.0315	0.804	0.0315	0.748	0.0315	0.66	0.0315	0.951	0.0315	0.553	0.0315	0.64	0.0315	1.95	0.0315	1.482
EELIAELQDcEGLIVR-A0A286YF22-C10zsw-TMT	1.181	1.099	1.159	0.0315	0.988	0.991	0.899	0.0315	1.11	1.101	1.105	0.0315	1.286	1.314	1.258	0.0315	1.386	1.447	1.481	0.0315
DGELLFVhSAEGSEFWSALLEK-B2RCM3-H8zsw-TMT	1.001	1.05	1.131	0.0315	1.525	0.847	0.617	0.0315	1.062	0.725	0.458	0.0315	1.065	0.835	0.533	0.0315	1.171	1.269	1.014	0.0315
YFhVVIAGPQDSPFEGGTFK-P61088-H3zsw-TMT	0.928	1.123	0.0315	0.799	0.917	0.875	0.0315	0.84	0.952	1.151	0.0315	0.91	1.263	1.401	0.0315	1.197	0.902	1.205	0.0315	0.949
VLQhYQESDKGEELGPGNVQK-Q53G34-H4zsw-TMT	0.0315	0.683	0.628	1.114	0.0315	1.971	2.457	3.141	0.0315	1.689	1.662	2.373	0.0315	1.111	0.656	0.827	0.0315	1.309	1.104	2.327
ThLPGFVEQAEALK-V9HW35-H2zsw-TMT	0.0315	0.0315	1.028	0.68	0.0315	0.0315	1.201	1.02	0.0315	0.0315	1.505	1.316	0.0315	0.0315	0.992	0.823	0.0315	0.0315	1.078	0.935
hAVSDPSILDSLDLNEDER-P05198-H1zsw-TMT	0.91	0.899	0.879	0.0315	0.878	0.966	1.218	0.0315	1.032	1.267	1.23	0.0315	0.896	1.163	0.969	0.0315	1.37	1.232	1.474	0.0315
AIGSASEGAQSSLQEVYhK-P28066-H18zsw-TMT	0.976	0.962	1.027	0.918	1.448	1.189	1.035	1.332	1.478	1.602	2.186	1.397	1.138	0.865	0.93	1.014	1.522	1.243	1.589	1.197
LTTLPSDFcGLTHLVK-Q96AG4-C9zsw-TMT	0.994	1.145	0.0315	1.295	0.913	0.882	0.0315	0.95	1.003	1.07	0.0315	0.93	1.171	1.134	0.0315	1.162	0.758	0.946	0.0315	0.759
EAEAAIYhLQLFEELR-P14618-H8zsw-TMT	0.882	0.859	0.985	0.811	0.617	0.493	0.511	0.493	0.573	0.495	0.639	0.391	0.84	0.873	0.769	0.604	0.858	0.87	0.856	0.766
AAHLcAEAALR-Q9UQ80-C5zsw-TMT	0.0315	0.0315	1.126	1.185	0.0315	0.0315	0.921	0.956	0.0315	0.0315	1.029	1.028	0.0315	0.0315	1.127	1.191	0.0315	0.0315	0.88	1.067
SThSELLEDYYQSGR-B4DZ22-H3zsw-TMT	0.0315	0.746	0.936	0.832	0.0315	1.105	1.126	1.201	0.0315	1.383	1.599	1.409	0.0315	0.908	0.996	1.24	0.0315	1.133	1.027	0.954
AITIAGVPQSVTEcVK-Q15365-C14zsw-TMT	0.857	0.0315	0.761	0.0315	1.001	0.0315	0.856	0.0315	0.961	0.0315	0.935	0.0315	1.036	0.0315	0.883	0.0315	0.983	0.0315	1.013	0.0315
DSLYVDGDcTMDIR-C9J0J7-C9zsw-TMT	0.0315	1.126	0.0315	0.997	0.0315	0.946	0.0315	0.736	0.0315	1.201	0.0315	1.173	0.0315	1.061	0.0315	1.07	0.0315	1.136	0.0315	1.068
LYhGAPFR-Q9BSE5-H3zsw-TMT	0.0315	1.009	0.986	0.0315	0.0315	1.452	1.304	0.0315	0.0315	1.912	1.616	0.0315	0.0315	0.884	0.986	0.0315	0.0315	1.072	1.045	0.0315
GLVLGPIhK-B4E2Z3-H8zsw-TMT	0.696	0.846	0.948	0.758	0.75	0.905	1.02	0.596	0.886	1.069	1.104	0.864	0.747	0.853	0.926	0.529	0.835	1.081	1.226	0.712
DVTNNVhYENYR-Q59EY4-H7zsw-TMT	0.0315	0.982	0.0315	0.824	0.0315	1.492	0.0315	1.335	0.0315	1.086	0.0315	0.995	0.0315	1.259	0.0315	1.063	0.0315	1.281	0.0315	1.242
RPPSAFFLFcSEYRPK-P09429-C10zsw-TMT	0.964	0.792	0.908	0.994	0.991	0.868	1.091	1.123	0.817	0.755	0.83	0.876	1.724	1.307	1.684	1.605	0.949	0.734	0.888	0.945
TGEAETITShYLFALGVYR-P24390-H10zsw-TMT	0.836	0.911	0.967	0.773	0.872	0.733	0.817	0.845	1	0.922	1.102	0.92	0.917	0.837	0.795	0.745	0.76	0.674	0.702	0.66
TIhTSTGK-A0A024R3R5-H3zsw-TMT	1.193	0.82	0.998	0.0315	1.981	2.159	1.876	0.0315	1.459	1.761	1.458	0.0315	1.216	1.077	0.951	0.0315	1.586	1.135	1.298	0.0315
MIPcDFLIPVQTQHPIR-B4DE36-C4zsw-TMT	1.168	0.0315	1.386	1.306	0.737	0.0315	0.743	0.677	1.027	0.0315	1.131	0.926	1.147	0.0315	0.976	0.99	0.783	0.0315	0.828	0.856
GFGhIGIAVPDVYSAcK-Q04760-H4zsw-TMT C16zsw-TMT	1.082	1.165	0.922	0.967	0.813	0.705	0.769	0.667	0.887	0.911	0.957	1.091	1.298	1.563	1.351	1.42	0.633	0.746	0.651	0.761
VYcENQPMLPIGLSDIPGEAMVK-P67870-C3zsw-TMT	0.0315	0.0315	1.661	1.066	0.0315	0.0315	0.852	0.861	0.0315	0.0315	0.964	1.103	0.0315	0.0315	1.169	1.215	0.0315	0.0315	1.061	1.033
EQcEQLEK-Q567R0-C3zsw-TMT	0.746	1.045	0.885	0.809	0.875	1.03	1.035	1.055	0.862	1.339	1.032	1.121	0.488	0.994	0.851	0.94	0.488	1.205	1.026	1.096
IGGVQQDTILAEGLhFR-J3KPX7-H15zsw-TMT	0.967	1.031	0.739	0.682	1.024	1.104	0.924	1.02	0.861	1.078	1.143	1.143	0.884	0.956	0.764	0.749	0.478	0.707	0.537	0.611
YMPQNPhIIATK-Q5JP01-H7zsw-TMT	0.236	0.809	1.124	0.988	0.517	1.721	1.711	1.593	0.0315	1.475	1.599	1.113	0.0315	1.256	1.384	1.235	0.0315	1.085	1.631	1.414
TVYGGGcSEMLMAhAVTQLANR-P78371-C7zsw-TMT H14zsw-TMT	0.0315	0.0315	0.891	0.989	0.0315	0.0315	0.78	0.866	0.0315	0.0315	0.905	1.08	0.0315	0.0315	1.176	1.589	0.0315	0.0315	0.793	0.756
AhGGYSVFAGVGER-P06576-H2zsw-TMT	0.967	0.979	0.946	0.947	1.294	1.282	1.317	1.406	1.25	1.476	1.503	1.631	0.89	1.059	1.002	1.043	0.882	0.969	0.991	1.056
ScVEEPEPEPEAAEGDGDKK-B2RDE8-C2zsw-TMT	0.0315	0.0315	0.896	0.748	0.0315	0.0315	1.149	1.028	0.0315	0.0315	0.715	0.599	0.0315	0.0315	0.822	0.815	0.0315	0.0315	1.192	1.112
DGQVINETSQHhDDLE-P08670-H12zsw-TMT	0.865	0.656	0.0315	1.576	3.006	2.226	0.0315	3.672	1.616	1.392	0.0315	1.73	2.347	1.816	0.0315	2.632	2.84	1.92	0.0315	3.378
TVYFAEEVQcEGNSFHK-B4E2T4-C10zsw-TMT	1.208	0.0315	0.954	1.174	1.028	0.0315	0.994	0.928	0.954	0.0315	0.984	1.074	1.647	0.0315	1.53	1.878	1.346	0.0315	1.191	1.344
cIPALDSLTPANEDQK-B3GQS7-C1zsw-TMT	0.908	0.936	1.107	0.931	1.221	0.903	0.825	0.908	0.999	0.855	0.881	1.063	1.279	1.063	0.641	0.96	0.961	0.801	0.662	0.833
GGALLTSTSGPGFhLMLPF-E5RHW4-H14zsw-TMT	0.0315	0.889	0.946	0.0315	0.0315	1.12	1.045	0.0315	0.0315	1.116	0.961	0.0315	0.0315	0.732	0.532	0.0315	0.0315	0.97	0.856	0.0315
TSYAQhQQVR-D6RG13-H6zsw-TMT	0.967	0.0315	1.2	1.103	1.142	0.0315	1.335	1.354	1.034	0.0315	1.304	1.384	1.025	0.0315	1.599	1.351	1.005	0.0315	1.144	1.296
TLNEADcATVPPAIR-B3KT34-C7zsw-TMT	1.03	0.932	0.882	0.904	1.004	1.155	1.019	0.91	1.156	1.147	1.058	1.077	0.889	1.035	0.961	0.979	0.973	0.989	1	0.936
LGVIEDhSNR-Q5CAQ5-H7zsw-TMT	0.0315	0.912	0.89	0.0315	0.0315	1.241	1.076	0.0315	0.0315	1.11	1.111	0.0315	0.0315	0.904	1.008	0.0315	0.0315	0.937	1.078	0.0315
DhPLPEVAHVK-P13073-H2zsw-TMT	0.893	1	0.898	1.086	1.111	1.136	1.149	1.298	1.06	0.989	1.016	1.245	0.877	0.948	1.015	1.207	0.954	0.958	1.167	1.243
GhDLNEDGLVSWEEYK-B3KQF5-H2zsw-TMT	0.993	0.804	0.978	0.812	1.067	1.024	1.108	0.826	1.199	1.025	1.174	1.1	0.918	0.761	0.97	0.872	0.844	0.859	0.882	0.953
AVGIDLGTTYScVGVFQHGK-P11142-C12zsw-TMT	0.457	0.823	0.808	0.646	0.309	0.807	0.787	0.67	0.107	0.824	0.699	0.53	0.0315	0.595	0.63	0.431	0.0315	0.648	0.566	0.251
VDEFPLcGH-X1WI28-C7zsw-TMT	0.0315	1.106	0.0315	1.028	0.0315	1.033	0.0315	0.9	0.0315	0.823	0.0315	0.751	0.0315	1.093	0.0315	1.133	0.0315	0.925	0.0315	0.931
KLEDQLQGGQLEEVILQAEhELNLAR-A0A024R772-H20zsw-TMT	0.0315	1.11	1.132	0.0315	0.0315	0.761	1.23	0.0315	0.0315	0.972	1.215	0.0315	0.0315	1.116	0.819	0.0315	0.0315	1.09	1.179	0.0315
DYLhLPPEIVPATLR-P46783-H4zsw-TMT	0.0315	0.0315	0.906	1.161	0.0315	0.0315	0.821	0.969	0.0315	0.0315	0.924	0.896	0.0315	0.0315	1.055	1.037	0.0315	0.0315	0.698	0.854
SLYQSAGVAPESFEYIEAhGTGTK-A0A0U1RQF0-H19zsw-TMT	0.968	0.744	1.198	0.0315	0.943	0.804	0.978	0.0315	1.063	1.067	1.073	0.0315	1.229	1.203	1.198	0.0315	1.161	0.869	1.145	0.0315
DGVYFLYEALhGPPK-B4E1L0-H11zsw-TMT	1.135	1.263	1.123	1.123	0.62	0.715	0.686	0.715	0.791	0.885	1.117	0.859	0.947	1.024	1.105	0.807	0.801	0.963	0.852	0.906
HcSQVDSVR-A0A024R5M3-C2zsw-TMT	0.839	0.821	0.0315	0.918	1.321	1.343	0.0315	1.139	0.875	0.83	0.0315	0.828	0.981	0.866	0.0315	1.082	1.083	0.959	0.0315	1.043
GLAPDLPEDLYhLIK-P62277-H12zsw-TMT	0.0315	1.033	1.1	0.0315	0.0315	0.93	1.034	0.0315	0.0315	0.801	1.042	0.0315	0.0315	0.954	0.999	0.0315	0.0315	0.846	0.917	0.0315
NMVLPEELLDDEEYEEIVEDVRDEcSK-B5BU25-C25zsw-TMT	0.0315	0.0315	0.858	1.217	0.0315	0.0315	1.08	1.256	0.0315	0.0315	0.69	0.849	0.0315	0.0315	0.746	0.809	0.0315	0.0315	1.194	1.294
NTWDcGLQILK-B4DP62-C5zsw-TMT	1.158	0.0315	0.0315	1.015	0.979	0.0315	0.0315	0.994	1.042	0.0315	0.0315	1.004	1.134	0.0315	0.0315	1.059	0.918	0.0315	0.0315	0.879
hTDVQFYTEVGEITTDLGK-Q9Y5B9-H1zsw-TMT	1.096	0.887	0.91	1.077	0.827	0.811	0.886	0.883	0.895	1.111	1.002	1.201	0.87	1	0.846	0.979	0.655	0.732	0.731	0.883
VTSVVFhPSQDLVFSASPDATIR-Q9UMS4-H7zsw-TMT	1.042	0.979	0.0315	0.0315	1.161	0.993	0.0315	0.0315	1.039	1.079	0.0315	0.0315	0.931	1.071	0.0315	0.0315	1.107	0.993	0.0315	0.0315
DNLTLWTSDSAGEEcDAAEGAEN-P27348-C15zsw-TMT	0.0315	1.033	1.043	0.911	0.0315	0.842	1.005	0.847	0.0315	0.864	1.021	0.613	0.0315	1.1	0.966	0.777	0.0315	1.383	1.308	0.486
TQGNVFATDAILATLMScTR-B0QYA4-C18zsw-TMT	0.0315	1.307	0.893	0.0315	0.0315	1.603	0.833	0.0315	0.0315	0.481	0.561	0.0315	0.0315	0.747	0.732	0.0315	0.0315	0.782	0.717	0.0315
FLDGNELTLADcNLLPK-A0A1U9X8Y4-C12zsw-TMT	1.073	1.305	1.03	1.158	1.048	0.906	1.003	0.883	0.786	0.799	0.896	0.705	1.112	0.994	0.973	0.844	0.924	0.874	0.8	0.753
HGGEDYVFSLLTGYcEPPTGVSLR-Q8TBT6-C15zsw-TMT	1.292	1.41	1.374	1.13	0.841	0.841	0.754	0.594	0.763	0.833	0.738	0.634	0.896	0.902	0.746	0.487	0.828	0.755	0.692	0.544
hTVDDGLDIR-A8K8U1-H1zsw-TMT	1.023	0.9	0.823	0.778	0.977	1.023	0.999	0.959	0.681	0.708	0.858	0.687	0.748	0.88	0.908	0.778	0.793	0.763	0.918	0.802
YShDFNFHINYGDLGFLGPEDLR-B7Z766-H3zsw-TMT	0.0315	1.086	0.0315	1.044	0.0315	1.116	0.0315	1.059	0.0315	1.283	0.0315	1.141	0.0315	0.991	0.0315	1.025	0.0315	0.92	0.0315	0.722
NATLSVHQLVENTDETYcINNEALYDIcFR-B7Z4N1-C18Carboxymethyl C28zsw-TMT	0.993	0.0315	0.932	1.111	1.242	0.0315	0.974	1.171	0.809	0.0315	0.735	0.928	0.912	0.0315	0.747	0.68	1.332	0.0315	1.391	1.327
VYNVTQhAVGIVVNK-G3V1B3-H7zsw-TMT	1.199	0.829	0.0315	0.0315	1.153	0.935	0.0315	0.0315	1.347	1.111	0.0315	0.0315	1.069	1.098	0.0315	0.0315	1.389	1.002	0.0315	0.0315
VLLVLcGGDD-Q6P452-C6zsw-TMT	0.975	0.922	0.0315	1.105	0.67	0.93	0.0315	0.683	0.334	0.738	0.0315	0.858	0.293	0.785	0.0315	0.821	0.063	0.764	0.0315	0.74
VhSFPTLK-P07237-H2zsw-TMT	0.772	0.979	0.791	0.825	1.27	1.383	0.991	1.526	1.362	1.525	0.734	1.966	0.673	1.056	0.25	0.759	0.968	1.156	1.277	1.26
ILTVEDhYYEGGIGEAVSSAVVGEPGITVTHLAVNR-B4E022-H7zsw-TMT	0.951	0.963	0.933	0.0315	0.839	0.65	0.585	0.0315	0.807	0.684	0.63	0.0315	0.742	0.704	0.704	0.0315	0.927	1.171	0.967	0.0315
YGQTLGQAQAhSQEQ-Q96I24-H11zsw-TMT	0.0315	0.778	0.0315	0.802	0.0315	1.387	0.0315	1.342	0.0315	1.27	0.0315	1.52	0.0315	0.832	0.0315	0.896	0.0315	1.367	0.0315	1.485
DLSYcLSGMYDHR-B4DKS8-C5zsw-TMT	0.0315	1.104	0.909	0.857	0.0315	0.837	0.885	0.913	0.0315	0.857	0.838	0.881	0.0315	0.902	0.989	1.204	0.0315	0.63	0.938	0.814
hGGTIPIVPTAEFQDR-B4DMF5-H1zsw-TMT	1.125	0.878	1.142	1.001	1.467	1.064	1.518	0.79	1.944	1.606	1.819	1.106	0.845	0.86	0.73	1.115	1.301	1.236	1.41	0.948
YhTEIVFAR-P05023-H2zsw-TMT	1.103	0.944	0.0315	0.0315	1.06	0.995	0.0315	0.0315	1.113	1.144	0.0315	0.0315	1.001	0.96	0.0315	0.0315	1.093	0.945	0.0315	0.0315
VhFEESSK-P12956-H2zsw-TMT	0.866	0.747	0.848	0.749	1.219	1.236	1.216	1.212	1.222	1.081	1.132	1.094	1.019	0.914	1.027	0.832	0.722	0.728	0.641	0.782
SSPPVVDTVhGK-P23141-H10zsw-TMT	0.0315	0.0315	0.965	0.874	0.0315	0.0315	0.821	0.773	0.0315	0.0315	1.548	1.561	0.0315	0.0315	0.84	0.731	0.0315	0.0315	1.004	0.846
IEWLEShQDADIEDFK-P11021-H7zsw-TMT	0.829	0.907	0.894	1.021	1.18	1.331	1.355	1.437	1.448	1.54	1.568	1.782	1.621	1.32	1.148	1.242	0.932	0.949	1.142	1.38
DGScSAEYIPFAPGDYDVNITYGGAHIPGSPFR-O75369-C4zsw-TMT	1.505	2.396	0.0315	1.619	0.593	0.614	0.0315	0.634	0.786	0.829	0.0315	0.725	0.737	0.715	0.0315	0.832	0.573	0.957	0.0315	0.717
TGFSTSPESPYThWK-E9PKG1-H13zsw-TMT	0.886	0.918	0.928	0.944	1.864	1.477	1.098	1.4	1.25	1.341	1.088	1.31	1.025	1.14	0.996	1.03	1.046	1.152	0.954	1.063
STAYEDYYYhPPPR-Q0VGD6-H10zsw-TMT	0.0315	0.7	0.646	0.899	0.0315	1.257	0.87	1.508	0.0315	1.879	0.829	1.832	0.0315	1.281	0.574	1.252	0.0315	1.351	0.882	1.228
hLLPTSGAAATAAAAAAAAAAVTAASTSYYGR-E9PB51-H1zsw-TMT	0.914	0.97	0.674	1.209	1.023	1.493	0.979	1.416	0.918	1.318	1.027	1.567	0.911	0.906	0.985	1.133	0.62	1.541	0.892	0.835
HLNEIDLFHcIDPNDSK-Q15185-C10zsw-TMT	1.248	1.197	1.315	1.174	0.883	0.902	0.945	0.815	0.826	0.981	1.09	0.89	1.046	0.926	0.925	0.878	0.721	0.756	0.845	0.748
VIFDIVDLcTTWEAMEK-S4R3Z2-C9zsw-TMT	1.697	0.0315	1.326	0.0315	0.752	0.0315	0.804	0.0315	0.595	0.0315	0.787	0.0315	0.0315	0.0315	0.538	0.0315	1.381	0.0315	1.119	0.0315
AASDIAMTELPPThPIR-P62258-H14zsw-TMT	1.078	0.889	0.962	0.0315	1.272	1.051	1.123	0.0315	1.153	1.216	1.343	0.0315	1.135	1.021	1.01	0.0315	1.753	1.547	1.55	0.0315
ALSDhHIYLEGTLLKPN-P04075-H5zsw-TMT	1.266	1.187	1.074	1.282	0.63	0.772	0.772	0.579	0.837	0.758	0.875	0.867	0.98	0.968	0.933	0.874	0.916	0.99	0.908	0.89
NEAIQAAHDAVAQEGQcR-A6NLJ7-C17zsw-TMT	1.207	0.0315	1.233	1.124	0.713	0.0315	0.639	0.788	0.543	0.0315	0.487	0.696	0.401	0.0315	0.556	0.561	0.492	0.0315	0.499	0.692
VWAhYEEQPVEEVMPVLEEK-B2R5U1-H4zsw-TMT	0.924	1.381	0.0315	0.0315	0.988	1.262	0.0315	0.0315	0.874	1.24	0.0315	0.0315	0.982	1.689	0.0315	0.0315	0.956	1.695	0.0315	0.0315
DAGAGIALNDhFVK-P04406-H11zsw-TMT	0.918	1.421	1.448	1.64	0.822	0.952	1.103	1.153	0.975	1.036	1.004	1.317	0.868	1.005	1.049	1.266	1.178	1.551	1.525	1.673
GSYSLShVYTPNDVR-Q5URX0-H7zsw-TMT	0.0315	1.116	0.0315	0.852	0.0315	1.284	0.0315	1.302	0.0315	1.285	0.0315	1.075	0.0315	0.942	0.0315	0.809	0.0315	0.95	0.0315	0.885
YcAGWADK-P00352-C2zsw-TMT	1.19	1.195	1.192	1.071	0.954	0.878	0.905	0.879	0.77	0.699	0.711	0.718	0.702	0.774	0.752	0.763	0.707	0.659	0.723	0.722
hNQLPLVIEFTEQTAPK-P07237-H1zsw-TMT	0.67	0.602	0.689	0.86	0.643	0.613	0.691	0.944	0.645	0.646	0.764	0.962	0.564	0.618	0.617	0.822	0.541	0.506	0.68	0.698
GVSSQETAGIGASAhLVNFK-P43490-H15zsw-TMT	1.014	1.101	0.947	1.1	0.808	0.898	0.75	0.8	0.684	0.793	0.654	0.72	0.59	0.748	0.905	0.641	0.707	0.764	0.679	0.579
NMSVIAHVDhGK-P13639-H10zsw-TMT	1.161	0.967	1.021	0.954	0.958	0.995	1.006	0.939	0.959	0.854	1.11	0.905	1.045	1.004	1.054	1.147	0.868	0.766	0.997	0.927
EGGGDSSASSPTEEEQEQGEIGAcSDEGTAQEGK-P49006-C24zsw-TMT	0.0315	0.0315	1.294	0.683	0.0315	0.0315	1.682	1.843	0.0315	0.0315	1.623	1.722	0.0315	0.0315	0.929	0.54	0.0315	0.0315	1.012	1.403
LMELhGEGSSSGK-D6RG13-H5zsw-TMT	1.139	0.0315	0.859	0.732	1.771	0.0315	1.468	1.35	1.483	0.0315	1.194	1.291	1.63	0.0315	1.564	1.25	1.51	0.0315	1.067	1.073
YEDIcPSTHNMDVPNIK-P63241-C5zsw-TMT	0.992	1.034	0.0315	0.829	1.091	1.099	0.0315	1.071	0.904	0.961	0.0315	1.07	1.133	1.493	0.0315	1.345	1.069	1.048	0.0315	1.112
LLLAGYDDFNcNIWDAMK-E7EP32-C11zsw-TMT	0.98	0.0315	1.012	0.0315	0.761	0.0315	0.714	0.0315	0.635	0.0315	0.637	0.0315	0.821	0.0315	0.63	0.0315	0.948	0.0315	0.801	0.0315
hNIMDFAMPY-Q00610-H1zsw-TMT	1.091	1.369	1.085	1.201	0.751	0.818	0.899	0.834	0.876	0.822	0.892	0.884	1.05	0.996	1.068	1.198	0.897	0.959	0.846	0.852
GAhGIIVVYDVTDQESFNNVK-P62820-H3zsw-TMT	0.0315	0.999	0.0315	0.779	0.0315	0.953	0.0315	1.062	0.0315	1.172	0.0315	1.143	0.0315	0.908	0.0315	1.025	0.0315	0.954	0.0315	1.053
HELQANcYEEVKDR-G3V1A4-C7zsw-TMT	1.189	1.102	0.0315	0.0315	1.046	1.126	0.0315	0.0315	0.933	0.997	0.0315	0.0315	0.927	0.779	0.0315	0.0315	1.025	0.976	0.0315	0.0315
GGPGSAVSPYPTFNPSSDVAALhK-P04083-H23zsw-TMT	0.964	0.967	0.0315	1.057	0.737	0.748	0.0315	0.849	1.029	0.89	0.0315	0.948	0.834	0.886	0.0315	1.001	1.035	1.207	0.0315	1.264
ASGNYATVIShNPETK-E9PKZ0-H11zsw-TMT	0.0315	0.922	0.869	0.0315	0.0315	1.167	1.356	0.0315	0.0315	1.206	1.188	0.0315	0.0315	1.197	1.136	0.0315	0.0315	1.368	1.233	0.0315
GLPWScSADEVMR-P55795-C6zsw-TMT	1.096	1.033	1.058	0.888	0.918	0.922	0.888	0.853	1.063	0.875	1.027	0.705	1.067	0.974	0.953	0.969	0.793	0.829	0.795	0.684
GNFTLPEVAEcFDEITYVELQK-Q00839-C11zsw-TMT	0.899	1.339	1.609	1.519	1.271	1.195	1.428	1.749	0.65	0.877	0.901	1.074	0.725	0.836	0.709	0.763	0.903	1.247	1.461	1.223
EGSGIGAIDSNLDWShNFTN-B4DJV2-H16zsw-TMT	0.0315	0.0315	0.899	0.855	0.0315	0.0315	1.013	1.289	0.0315	0.0315	0.922	1.071	0.0315	0.0315	0.765	0.889	0.0315	0.0315	0.902	0.981
YSNEDTLSVALPYFWEhFDK-P26641-H17zsw-TMT	0.97	0.764	0.814	1.032	1.213	1.134	0.92	0.98	0.676	0.868	0.731	0.748	1.026	1.128	0.885	1.051	1.686	1.43	1.029	1.286
TGcNVLLIQK-B7Z9L0-C3zsw-TMT	0.761	0.962	0.99	1.181	0.647	0.758	0.824	0.794	0.652	0.789	0.832	0.807	0.691	0.768	0.916	1.049	0.625	0.573	0.727	0.857
DLTTAGAVTQcYR-M0R3D6-C11zsw-TMT	1.16	1.268	0.0315	0.0315	0.953	0.894	0.0315	0.0315	0.794	0.938	0.0315	0.0315	1.277	1.063	0.0315	0.0315	1.297	1.062	0.0315	0.0315
LLVVPMDGShWF-Q13406-H10zsw-TMT	0.0315	0.0315	0.998	0.935	0.0315	0.0315	0.732	0.742	0.0315	0.0315	0.758	0.782	0.0315	0.0315	0.805	0.769	0.0315	0.0315	0.822	0.989
GTIVLASPGWTThSISDGK-A0A024R172-H13zsw-TMT	0.935	1.231	1.148	1.173	0.664	0.659	0.592	0.619	0.724	0.78	0.662	0.711	0.774	0.809	0.896	0.781	0.923	0.876	0.98	0.935
TTGIVMDSGDGVThTVPIYEGYALPH-Q8WVW5-H14zsw-TMT	0.0315	0.0315	0.656	0.79	0.0315	0.0315	1.61	1.347	0.0315	0.0315	0.769	1.049	0.0315	0.0315	0.976	1.04	0.0315	0.0315	1.171	1.053
ASPDGYDcYFDNVGGEFSNTVIGQMK-A0A024R172-C8zsw-TMT	1.49	1.564	1.284	1.466	0.784	0.574	0.548	0.491	0.615	0.502	0.533	0.347	0.73	0.711	0.568	0.531	0.911	1.082	0.949	0.909
RTTGIVMDSGDGVThTVPIYEGYALPHAILR-Q8WVW5-H15zsw-TMT	0.0315	0.0315	0.885	0.808	0.0315	0.0315	0.753	0.793	0.0315	0.0315	0.706	0.586	0.0315	0.0315	1.012	0.527	0.0315	0.0315	0.905	0.449
GILGYTEHQVVSSDFNSDThSSTFDAGAGIALNDHFVK-P04406-H20zsw-TMT	0.0315	1.211	0.0315	1.221	0.0315	0.552	0.0315	0.839	0.0315	0.671	0.0315	0.0315	0.0315	0.593	0.0315	0.0315	0.0315	0.799	0.0315	1.079
IWcFGPDGTGPN-P13639-C3zsw-TMT	1.245	0.0315	1.112	1.246	1.043	0.0315	0.922	1.068	1.13	0.0315	1.25	1.12	1.232	0.0315	1.132	1.299	1.007	0.0315	1.071	1.13
VDNDENEhQLSLR-A0A0S2Z4G7-H8zsw-TMT	0.885	0.923	0.0315	0.789	1.549	1.654	0.0315	2.234	2.159	2.081	0.0315	2.585	1.306	1.229	0.0315	1.512	1.728	1.803	0.0315	1.883
YLVLDcVPEER-O14776-C6zsw-TMT	0.0315	1.223	0.95	0.0315	0.0315	0.896	0.844	0.0315	0.0315	1.296	0.942	0.0315	0.0315	1.05	0.9	0.0315	0.0315	0.955	0.714	0.0315
YQVFFFGThETAFLGPK-B2RDE8-H9zsw-TMT	0.0315	0.0315	0.925	0.95	0.0315	0.0315	0.858	0.691	0.0315	0.0315	0.89	0.749	0.0315	0.0315	0.998	0.966	0.0315	0.0315	0.685	0.716
LVIVGDGAcGK-P61586-C9zsw-TMT	1.056	1.118	0.0315	0.0315	0.901	0.808	0.0315	0.0315	0.809	0.912	0.0315	0.0315	0.988	1.194	0.0315	0.0315	0.872	0.967	0.0315	0.0315
KITIADcGQLE-A8K486-C7zsw-TMT	1.159	0.973	1.08	1.078	1.264	1.042	1.217	1.241	0.954	0.611	0.874	0.866	1.081	0.596	1.042	1.084	1.476	0.741	1.435	1.601
TVVTGIEMFhK-P49411-H10zsw-TMT	0.711	0.979	0.816	0.929	0.914	0.968	1.138	0.903	0.835	1.021	0.97	0.572	0.669	0.676	0.742	0.813	0.56	0.657	0.576	0.769
FNLTGLNEQVPhYR-P67870-H12zsw-TMT	0.0315	0.0315	1.178	0.835	0.0315	0.0315	1.302	1.253	0.0315	0.0315	1.407	1.429	0.0315	0.0315	1.162	1.147	0.0315	0.0315	1.369	1.133
FQPSFLGMEScGIHETTFNSIMK-Q8WVW5-C11zsw-TMT	0.0315	0.0315	0.935	1.21	0.0315	0.0315	0.885	0.742	0.0315	0.0315	0.689	0.598	0.0315	0.0315	1.053	0.909	0.0315	0.0315	0.758	0.693
SShYDELLAAEAR-B2R5U1-H3zsw-TMT	1.022	0.0315	0.0315	0.883	0.994	0.0315	0.0315	1.139	1.416	0.0315	0.0315	1.308	1.11	0.0315	0.0315	1.107	1.158	0.0315	0.0315	1.369
SIQGQhTISPLDLAK-Q15365-H6zsw-TMT	0.0315	0.0315	0.723	0.813	0.0315	0.0315	1.494	1.8	0.0315	0.0315	1.314	1.283	0.0315	0.0315	1.233	1.361	0.0315	0.0315	1.337	1.455
PLLMVhGWPGSFYEFYK-P07099-H6zsw-TMT	0.958	1.012	1.125	1.138	0.697	0.69	0.671	0.681	0.816	0.768	0.754	0.854	0.998	0.875	0.787	0.8	0.745	0.713	0.694	0.722
YLMDEGAhLHIYDPK-O60701-H8zsw-TMT	0.966	0.0315	0.917	0.91	0.901	0.0315	0.808	0.887	1.001	0.0315	0.964	0.998	0.706	0.0315	0.656	0.78	0.85	0.0315	0.87	0.806
NLhYFNSDSFASHPNYPYSDEY-S4R3Z2-H3zsw-TMT	1.996	0.0315	1.814	0.0315	0.595	0.0315	0.661	0.0315	1.269	0.0315	1.052	0.0315	0.678	0.0315	0.732	0.0315	1.569	0.0315	1.43	0.0315
ATAGDThLGGEDFDNR-A0A1U9X7W4-H7zsw-TMT	0.798	0.881	0.698	0.642	0.905	0.633	0.782	0.863	1.256	1.319	1.302	1.031	1.319	1.374	1.255	1.353	1.827	2.622	1.631	1.744
AWVWNTHADFADEcPKPELLAIR-C9JJ34-C14zsw-TMT	0.0315	0.0315	0.846	0.958	0.0315	0.0315	0.683	0.831	0.0315	0.0315	0.869	0.889	0.0315	0.0315	0.99	1.055	0.0315	0.0315	0.68	0.794
DGNASGTTLLEALDcILPPTRPTDK-P68104-C15zsw-TMT	0.0315	0.0315	1.415	1.492	0.0315	0.0315	0.541	0.51	0.0315	0.0315	0.56	0.575	0.0315	0.0315	0.907	0.998	0.0315	0.0315	0.744	0.747
AIThLNNNFMFGQK-Q6NTA2-H4zsw-TMT	0.748	1.1	0.0315	0.0315	1.274	1.106	0.0315	0.0315	0.983	0.983	0.0315	0.0315	0.861	1.09	0.0315	0.0315	0.68	0.963	0.0315	0.0315
VNIAFNYDMPEDSDTYLhR-Q13838-H18zsw-TMT	0.893	0.992	0.916	0.971	1.162	1.127	0.987	1.102	0.961	0.969	1.064	1.077	1.244	1.321	1.05	1.241	1.198	1.143	1.04	1.236
LNSHMNALhLGSQANR-Q2VF42-H9zsw-TMT	1.613	0.0315	1.242	0.0315	0.46	0.0315	0.569	0.0315	0.562	0.0315	0.672	0.0315	0.458	0.0315	0.746	0.0315	0.631	0.0315	0.705	0.0315
GVVEVThDLQK-P50454-H7zsw-TMT	0.848	0.862	0.0315	0.664	1.217	1.416	0.0315	1.181	1.035	1.275	0.0315	1.172	1.019	1.31	0.0315	0.962	1.167	1.474	0.0315	0.942
GLPWScSADEVQR-P31943-C6zsw-TMT	1.015	0.938	0.0315	0.0315	1.232	1.115	0.0315	0.0315	1.153	1.12	0.0315	0.0315	1.083	0.972	0.0315	0.0315	0.867	0.716	0.0315	0.0315
VATTAGLYGSNLMEHTEIDhWLEFSATK-P07814-H20zsw-TMT	0.0315	0.0315	1.188	1.492	0.0315	0.0315	1.086	1.063	0.0315	0.0315	1.108	1.016	0.0315	0.0315	1.023	0.972	0.0315	0.0315	1.34	1.345
TTGIVmDSGDGVThTVPIYEGY-Q8WVW5-M6Oxidation H14zsw-TMT	0.0315	0.0315	0.869	0.844	0.0315	0.0315	1.304	1.311	0.0315	0.0315	1.136	1.2	0.0315	0.0315	1.127	1.111	0.0315	0.0315	1.401	1.417
YLDEDTIYhLQPSGR-B4DEX8-H9zsw-TMT	0.0315	0.845	0.946	0.0315	0.0315	1.125	1.175	0.0315	0.0315	1.456	1.592	0.0315	0.0315	1.229	1.179	0.0315	0.0315	1.054	1.259	0.0315
EFhLNESGDPSSK-A0A024R895-H3zsw-TMT	0.0315	0.0315	0.878	0.875	0.0315	0.0315	1.42	1.63	0.0315	0.0315	1.235	1.426	0.0315	0.0315	1.213	1.467	0.0315	0.0315	1.857	2.021
EScLEAYTGIVQGLK-B2RBR9-C3zsw-TMT	0.885	0.971	0.0315	0.869	0.586	0.829	0.0315	0.652	0.829	0.914	0.0315	0.889	0.875	0.967	0.0315	0.716	0.628	0.753	0.0315	0.605
LNcQVIGASVDSHFcHLAWVNTPK-Q06830-C3Carboxymethyl C15zsw-TMT	0.0315	0.0315	1.165	1.298	0.0315	0.0315	0.795	0.781	0.0315	0.0315	1.037	1.267	0.0315	0.0315	0.808	1.072	0.0315	0.0315	1.327	1.014
FcLDNGAK-P00558-C2zsw-TMT	1.124	1.118	1.095	1.176	0.794	0.785	0.783	0.655	0.708	0.769	0.767	0.557	0.755	0.796	1.058	0.791	0.916	0.906	0.905	0.736
SGAELALDYLcR-A0A024R836-C11zsw-TMT	1.007	0.923	0.0315	0.0315	0.709	0.796	0.0315	0.0315	0.646	0.834	0.0315	0.0315	0.877	1	0.0315	0.0315	0.748	0.809	0.0315	0.0315
ALLVTASQcQQPAENK-B4DI38-C9zsw-TMT	0.0315	0.0315	0.993	0.744	0.0315	0.0315	1.081	1.014	0.0315	0.0315	1.196	1.112	0.0315	0.0315	1.2	1.085	0.0315	0.0315	1.375	1.255
EAYPGDVFYLhSR-P25705-H11zsw-TMT	0.0315	0.0315	1.061	1.085	0.0315	0.0315	0.781	0.901	0.0315	0.0315	1.569	1.258	0.0315	0.0315	2.071	1.615	0.0315	0.0315	1.308	1.166
ADKDYhFK-A0A0S2Z4G7-H6zsw-TMT	0.966	0.0315	0.0315	0.941	1.235	0.0315	0.0315	1.255	1.345	0.0315	0.0315	1.344	1.284	0.0315	0.0315	1.218	1.19	0.0315	0.0315	1.19
VEYTPYEEGLHSVDVTYDGSPVPSSPFQVPVTEGcDPSR-Q5HY54-C35zsw-TMT	0.764	0.0315	0.66	0.829	0.39	0.0315	0.604	0.527	0.434	0.0315	0.367	0.396	0.529	0.0315	0.594	0.507	1.443	0.0315	1.174	1.29
TFShELSDFGLESTAGEIPVVAIR-P30101-H4zsw-TMT	0.958	0.806	0.869	0.909	1.257	1.129	1.295	1.134	1.291	1.264	1.254	0.988	1.054	0.759	0.84	0.86	1.284	0.829	1.167	1.076
SLQELFLAhILSPWGAEVK-B4E0E1-H9zsw-TMT	1.677	0.0315	0.0315	0.89	1.959	0.0315	0.0315	1.129	1.392	0.0315	0.0315	0.988	1.274	0.0315	0.0315	0.893	1.651	0.0315	0.0315	1.061
LLETTDRPDGhQNNLR-B2RBR9-H11zsw-TMT	0.861	0.892	0.0315	0.0315	1.511	1.594	0.0315	0.0315	1.532	1.82	0.0315	0.0315	1.258	1.434	0.0315	0.0315	1.69	1.941	0.0315	0.0315
hWGGNVLGPK-P62424-H1zsw-TMT	0.895	0.0315	1.023	1.023	0.835	0.0315	1.111	0.991	0.593	0.0315	0.813	0.772	0.742	0.0315	0.849	0.862	0.651	0.0315	0.801	0.776
SNLDPSNVDSLFYAAQASQALSGcEISISNETK-P04844-C24zsw-TMT	0.917	0.0315	0.0315	0.0315	1.115	0.836	0.0315	0.0315	0.894	0.366	0.0315	0.0315	0.758	0.687	0.0315	0.0315	0.963	0.639	0.0315	0.0315
GQPIYIQFSNhK-A6NLN1-H11zsw-TMT	0.969	1.024	1.022	0.933	1.159	1.267	1.191	1.185	1.148	1.154	1.118	1.217	0.978	0.901	1.069	1.162	0.945	0.954	0.777	1.005
FhQLDIDDLQSIR-P16152-H2zsw-TMT	1.131	1.062	0.839	0.0315	0.779	0.829	0.735	0.0315	1.127	1.042	0.862	0.0315	0.797	0.764	0.823	0.0315	0.827	0.894	0.813	0.0315
LGIWGFFSTGDEhSR-P23141-H13zsw-TMT	0.794	0.813	0.695	0.844	0.515	0.618	0.447	0.568	0.885	0.893	0.748	0.879	0.666	0.661	0.547	0.719	0.488	0.515	0.467	0.681
VAYVSFGPhAGK-A0PJ62-H9zsw-TMT	1.156	0.963	1.134	0.0315	1.182	1.011	1.422	0.0315	1.251	1.221	1.439	0.0315	1.225	1.016	1.291	0.0315	1.277	1.066	1.684	0.0315
GFVEPDhYVVVGAQR-A8K6Q8-H7zsw-TMT	0.0315	0.783	0.847	0.8	0.0315	0.944	1.04	1.236	0.0315	1.022	0.933	1.144	0.0315	0.997	1.32	1.233	0.0315	1.033	1.161	1.215
DLLPSDMAVALLEAQAGTGhIIDPATSAR-Q15149-H20zsw-TMT	0.0315	1.056	0.773	0.899	0.0315	0.822	0.745	0.81	0.0315	0.663	0.598	0.647	0.0315	0.916	0.638	1	0.0315	0.812	0.806	0.981
NAFYIGSYQQcINEAQR-O14579-C11zsw-TMT	0.0315	1.05	0.0315	0.903	0.0315	1.041	0.0315	0.977	0.0315	1.321	0.0315	1.312	0.0315	1.275	0.0315	1.143	0.0315	0.976	0.0315	1.2
EhHQLQR-Q13268-H2zsw-TMT	1.045	0.974	1.198	0.0315	1.125	0.97	1.126	0.0315	4.522	4.465	1.757	0.0315	0.864	0.732	0.825	0.0315	0.991	0.897	0.842	0.0315
DKPELQFPFLQDEDTVATLLEcK-A0A024R1T5-C22zsw-TMT	0.0315	1.03	0.0315	1.457	0.0315	1.284	0.0315	1.498	0.0315	0.87	0.0315	1.002	0.0315	0.953	0.0315	1.415	0.0315	1.262	0.0315	1.719
TFcQLILDPIFK-P13639-C3zsw-TMT	1.235	1.15	1.202	1.215	0.954	1.032	0.851	0.899	0.724	0.817	0.72	0.71	1.372	1.297	1.291	1.334	0.928	0.904	1.008	0.903
GWDQGLLGMcEGEK-P26885-C10zsw-TMT	0.0315	1.221	0.0315	1.479	0.0315	0.868	0.0315	1.136	0.0315	0.722	0.0315	0.897	0.0315	1.125	0.0315	1.24	0.0315	0.762	0.0315	0.896
SAGQGEVLVYVEDPAGhQEEAK-Q5HY54-H17zsw-TMT	0.0315	0.0315	1.078	1.073	0.0315	0.0315	1.195	0.923	0.0315	0.0315	1.079	0.974	0.0315	0.0315	0.818	0.779	0.0315	0.0315	1.337	0.994
GEGGTTNPhIFPEGSEPK-F5GYN4-H9zsw-TMT	1.002	0.824	0.877	0.941	1.543	1.88	1.841	1.676	2.377	2.26	2.025	1.661	1.046	1.232	1.231	1.217	1.483	1.763	1.857	1.583
NFLYDIAGcSGTFTVQNR-P49915-C9zsw-TMT	0.0315	0.743	0.0315	0.86	0.0315	0.821	0.0315	0.856	0.0315	0.571	0.0315	0.72	0.0315	0.898	0.0315	0.813	0.0315	0.591	0.0315	0.517
NNQFQALLQYADPVSAQhAK-A6NLN1-H18zsw-TMT	1.058	1.07	0.916	1.013	0.835	0.988	1.047	0.898	1.046	1.04	0.76	1.023	1.152	1.192	0.902	1.25	0.939	1.011	0.753	0.894
ILDWhVANTDKK-P37837-H5zsw-TMT	0.0315	0.0315	0.918	0.678	0.0315	0.0315	1.145	0.98	0.0315	0.0315	0.995	0.946	0.0315	0.0315	0.856	0.834	0.0315	0.0315	1.135	1.109
IAILTcPFEPPKPK-B4DDU6-C6zsw-TMT	1.016	1.007	1.104	1.134	0.953	0.843	1.036	0.922	1.09	1.019	1.014	1.23	1.346	1.22	1.023	1.279	1.103	0.887	1.053	1.17
FhHTIGGSR-P61313-H2zsw-TMT	0.0315	0.0315	0.969	1.065	0.0315	0.0315	1.176	1.302	0.0315	0.0315	0.898	0.937	0.0315	0.0315	1.217	1.441	0.0315	0.0315	0.849	0.933
IIYGGSVTGATcK-V9HWK1-C12zsw-TMT	1.077	0.0315	1.113	1.114	1.114	0.0315	1.226	1.176	1.055	0.0315	1.165	1.101	1.1	0.0315	1.11	1.2	1.341	0.0315	1.316	1.467
IIPGFmcQGGDFTR-A8K486-M6Oxidation C7zsw-TMT	0.0315	0.0315	1.195	1.101	0.0315	0.0315	0.957	0.981	0.0315	0.0315	0.771	0.779	0.0315	0.0315	1.254	1.14	0.0315	0.0315	0.969	0.976
DELFALEQScAQVVLQAANER-B3KTA3-C10zsw-TMT	1.419	0.0315	0.0315	1.105	1.741	0.0315	0.0315	0.936	1.056	0.0315	0.0315	0.693	1.585	0.0315	0.0315	1.062	1.379	0.0315	0.0315	1.598
VLMVEEPSMDLEWLYGcPPPYHTFEEPVYMK-A0A059QX78-C17zsw-TMT	0.0315	0.0315	0.912	0.979	0.0315	0.0315	0.742	0.55	0.0315	0.0315	0.867	0.537	0.0315	0.0315	0.79	0.381	0.0315	0.0315	0.914	0.8
hVIPMNPNTDDLFK-A0A0A0MSQ0-H1zsw-TMT	0.792	0.64	0.0315	0.854	0.923	0.92	0.0315	1.086	1.255	0.937	0.0315	1.309	1.131	0.724	0.0315	1.104	0.908	0.721	0.0315	0.867
ELWLVIhGR-Q5HYD9-H7zsw-TMT	0.965	0.0315	1.004	0.903	0.71	0.0315	0.702	0.708	0.921	0.0315	1.074	1.223	0.771	0.0315	0.879	0.889	0.697	0.0315	0.71	0.691
SIcTTVLELLDK-P27348-C3zsw-TMT	1.148	1.287	1.192	1.123	0.848	0.94	0.907	0.688	0.708	0.759	0.709	0.682	1.075	1.005	1.123	1.208	0.912	0.989	1.183	1.147
YVTIIDAPGhR-P68104-H10zsw-TMT	0.893	0.0315	0.821	0.841	0.695	0.0315	0.692	0.648	0.984	0.0315	0.98	0.975	0.872	0.0315	0.824	0.86	0.701	0.0315	0.642	0.701
KYEDIcPSTHNMDVPNIK-P63241-C6zsw-TMT	1.003	0.854	0.0315	0.0315	1.071	1.132	0.0315	0.0315	1.197	0.788	0.0315	0.0315	1.248	1.347	0.0315	0.0315	1.319	1.268	0.0315	0.0315
VVcDENGSK-A0A087WTT1-C3zsw-TMT	1.174	0.0315	0.0315	1.031	1.337	0.0315	0.0315	1.31	1.252	0.0315	0.0315	1.319	1.161	0.0315	0.0315	1.141	1.486	0.0315	0.0315	1.379
FLQDcQELSLWINEK-D6W5C0-C5zsw-TMT	0.927	0.0315	0.917	0.0315	0.988	0.0315	1.055	0.0315	1.027	0.0315	0.757	0.0315	0.884	0.0315	0.695	0.0315	0.82	0.0315	0.654	0.0315
DEAGhFLWPGFGENAR-Q16822-H5zsw-TMT	0.0315	0.935	1.064	0.0315	0.0315	0.856	0.93	0.0315	0.0315	1.129	1.289	0.0315	0.0315	0.987	0.854	0.0315	0.0315	0.574	0.872	0.0315
IVSLFAEhNDLQYAAPGGLIGVGTK-P41091-H8zsw-TMT	0.774	0.0315	0.912	0.735	0.898	0.0315	0.929	0.843	0.917	0.0315	1.155	0.806	1.002	0.0315	1.225	0.892	0.874	0.0315	0.811	0.7
KDGNASGTTLLEALDcILPPTR-P68104-C16zsw-TMT	0.0315	0.0315	1.285	0.982	0.0315	0.0315	0.911	0.947	0.0315	0.0315	0.782	0.885	0.0315	0.0315	1.098	1.051	0.0315	0.0315	0.87	0.888
VTAEVVLAhLGGGSTSR-P04843-H9zsw-TMT	0.825	1.009	0.822	0.916	0.932	1.139	1.047	1.032	0.849	1.01	1.045	1.065	0.787	0.902	0.975	0.886	0.777	0.842	0.842	0.846
VDIDAPDVDVHGPDWhLK-Q09666-H16zsw-TMT	0.0315	0.881	0.853	0.666	0.0315	0.699	0.874	0.753	0.0315	0.91	1.069	0.886	0.0315	0.862	0.996	0.78	0.0315	1.063	1.268	1.423
IDFEDVIAEPEGThSFDGIWK-A9XTE5-H14zsw-TMT	0.0315	0.691	0.0315	0.868	0.0315	0.447	0.0315	0.603	0.0315	0.4	0.0315	0.653	0.0315	0.557	0.0315	0.635	0.0315	0.454	0.0315	0.671
FGGQLLSFDIGDQPVFEIPLSNVSQcTTGK-Q08945-C26zsw-TMT	0.0315	1.226	0.854	1.196	0.0315	1.163	1.378	1.252	0.0315	0.598	0.999	0.866	0.0315	0.8	0.919	0.753	0.0315	0.941	1.448	1.367
LLhVAVSDVNDDVR-Q05BX4-H3zsw-TMT	0.848	0.0315	0.914	0.0315	1.047	0.0315	1.126	0.0315	1.91	0.0315	1.302	0.0315	0.905	0.0315	0.943	0.0315	1.019	0.0315	1.12	0.0315
MVVNEGSDGGQSVYHVHLhVLGGR-P49773-H19zsw-TMT	0.584	0.653	0.0315	0.972	0.956	0.79	0.0315	1.391	1.143	1.042	0.0315	1.267	1.038	1.136	0.0315	1.641	1.476	1.238	0.0315	1.761
IEVPLYSLLEQThLK-B4DF68-H13zsw-TMT	1.148	1.092	1.26	0.0315	0.814	0.816	0.906	0.0315	0.775	0.775	0.736	0.0315	1.244	1.196	1.519	0.0315	0.876	0.903	1.185	0.0315
LGDVYVNDAFGTAhR-P00558-H14zsw-TMT	1	0.0315	0.977	1.06	0.918	0.0315	0.806	0.628	0.891	0.0315	0.728	0.743	0.935	0.0315	0.986	0.69	1.054	0.0315	0.835	1.078
hFVGMLPEK-F6RFD5-H1zsw-TMT	0.961	1.117	1.092	0.864	0.854	0.903	0.876	0.779	1.377	1.086	1.162	1.268	0.764	0.867	1.014	0.755	0.685	0.811	0.959	0.934
PhSVSLNDTETR-A8KA83-H2zsw-TMT	0.926	0.889	0.622	0.726	1.065	1.02	1.352	1.343	0.82	0.77	1.143	1.041	0.86	0.818	1.007	0.943	1.059	0.969	1.381	1.148
DAVTYTEhAK-P62805-H8zsw-TMT	1.219	1.16	1.087	1.316	2.698	2.848	2.78	2.975	2.147	2.045	2.039	2.185	1.242	1.137	1.152	1.302	1.535	1.575	1.46	1.563
AYEDGcK-A8K690-C6zsw-TMT	0.781	0.66	0.613	0.842	0.808	0.776	0.647	0.747	0.472	0.556	0.221	0.501	0.879	1.078	0.309	0.768	0.862	1.082	0.857	0.796
ESFEGQMTEDNIEVGIcNEAGFR-P25787-C17zsw-TMT	0.0315	1.153	1.006	1.349	0.0315	1.086	0.889	1.025	0.0315	0.863	0.839	0.911	0.0315	0.926	0.92	0.853	0.0315	1.399	1.138	1.4
SESTAAAEhK-Q16822-H9zsw-TMT	0.991	1.059	0.0315	0.0315	1.132	1.264	0.0315	0.0315	1.958	2.297	0.0315	0.0315	1.118	0.912	0.0315	0.0315	0.886	0.782	0.0315	0.0315
GQDHcGIESEVVAGIPR-B4DMY4-C5zsw-TMT	1.122	1.13	0.0315	1.004	0.836	0.806	0.0315	0.742	0.974	1.114	0.0315	0.903	0.923	0.937	0.0315	0.928	0.959	0.894	0.0315	0.858
NEAIQAAhDAVAQEGQcR-A6NLJ7-H8zsw-TMT C17zsw-TMT	0.903	0.96	0.97	0.911	0.655	0.662	0.537	0.634	0.607	0.646	0.518	0.675	0.403	0.467	0.351	0.458	0.494	0.424	0.378	0.483
TATPQQAQEVhEK-V9HWK1-H11zsw-TMT	0.828	0.0315	1.162	1.01	1.202	0.0315	1.791	1.37	1.066	0.0315	1.317	1.026	1.163	0.0315	1.41	1.212	1.483	0.0315	1.254	1.497
GVEGTWVDIcNNPAMEAEILK-B4DH39-C10zsw-TMT	1.259	1.076	1.003	1.082	1.206	1.201	0.98	1.375	1	0.975	1.071	1.196	0.86	0.941	0.743	0.85	1.012	0.742	1.042	0.894
WAELLPLLQQcQVVR-A0A024RC87-C11zsw-TMT	1.286	1.19	0.0315	1.577	0.681	0.852	0.0315	0.794	0.7	0.883	0.0315	0.703	0.965	1.089	0.0315	1.028	0.822	0.973	0.0315	0.971
IQGEYMIPcEK-A0A1B0GW44-C9zsw-TMT	0.0315	0.0315	0.974	1.088	0.0315	0.0315	0.98	1.005	0.0315	0.0315	0.904	0.927	0.0315	0.0315	1.015	0.98	0.0315	0.0315	0.898	0.94
AcANPAAGSVILLENLR-P00558-C2zsw-TMT	0.905	1.128	0.702	0.927	0.585	0.622	0.511	0.508	0.725	0.711	0.72	0.862	0.873	0.757	0.438	0.694	0.702	0.594	0.456	0.523
NVhGINFVSPVR-H0YCY8-H3zsw-TMT	1.03	1.011	1.048	0.93	1.079	1.001	1.151	1.106	1.112	1.159	1.101	1.169	0.947	0.859	1.055	0.951	0.952	0.96	0.964	0.941
AYPLADAhLTK-P55769-H8zsw-TMT	0.883	0.0315	0.796	0.824	1.103	0.0315	1.269	1.26	1.285	0.0315	1.187	1.256	0.9	0.0315	1.042	0.954	1.011	0.0315	1.119	1.091
KGSITSVQAIYVPADDLTDPAPATTFAhLDATTVLSR-P06576-H28zsw-TMT	0.717	0.0315	0.565	0.829	1.299	0.0315	0.93	1.384	1.323	0.0315	1.079	1.255	0.952	0.0315	0.604	1.224	0.819	0.0315	0.979	1.215
EhLELFWSR-Q00610-H2zsw-TMT	0.895	0.898	0.0315	0.0315	0.936	1.031	0.0315	0.0315	1.005	0.871	0.0315	0.0315	0.897	1.135	0.0315	0.0315	0.704	0.608	0.0315	0.0315
VhTVEDYQAIVDAEWNILYDK-Q53HV2-H2zsw-TMT	0.949	0.0315	1.058	1.144	0.873	0.0315	0.955	1.185	0.953	0.0315	0.821	0.914	1.01	0.0315	0.95	1.32	1.351	0.0315	0.922	1.148
LVSNhSLHETSSVFVDSLTK-Q5HY54-H5zsw-TMT	0.667	0.0315	0.931	0.656	0.809	0.0315	0.63	0.694	0.856	0.0315	0.684	0.796	0.793	0.0315	0.831	0.83	1.328	0.0315	1.13	1.042
hGSLGFLPR-P39023-H1zsw-TMT	0.0315	0.0315	0.726	0.749	0.0315	0.0315	0.638	0.622	0.0315	0.0315	0.762	0.622	0.0315	0.0315	0.884	0.979	0.0315	0.0315	0.833	0.814
GDLSTALEVAIDcYEK-P42704-C13zsw-TMT	0.98	0.899	0.0315	0.0315	1.333	1.29	0.0315	0.0315	1.223	1.086	0.0315	0.0315	1.027	0.84	0.0315	0.0315	1.152	1.052	0.0315	0.0315
GVQDIVVGEGThFLIPWVQK-P35232-H12zsw-TMT	1.099	1.161	0.0315	1.143	1.077	0.962	0.0315	0.988	0.968	0.933	0.0315	0.976	1.179	1.001	0.0315	0.872	0.784	0.889	0.0315	0.776
GYGFVhFETQEAAER-A0A087WTT1-H6zsw-TMT	0.981	1.012	1.125	0.0315	1.07	1.281	1.171	0.0315	1.077	1.192	1.303	0.0315	1.082	1.219	1.068	0.0315	1.495	1.6	1.38	0.0315
AAVEEGIVLGGGcALLR-B3GQS7-C13zsw-TMT	0.896	0.842	1.015	0.824	1.059	0.913	0.99	0.912	1.096	1.085	1.095	1.166	0.931	0.921	0.984	0.878	0.825	0.864	0.874	0.833
LNFShGTHEYHAETIK-P14618-H5zsw-TMT	1.173	1.215	1.211	0.0315	0.696	0.61	0.622	0.0315	0.693	0.754	0.723	0.0315	0.75	0.864	0.775	0.0315	0.982	1.082	1.008	0.0315
TQTVcNFTDGALVQHQEWDGK-I6L8B7-C5zsw-TMT	0.0315	0.0315	1.088	1.162	0.0315	0.0315	0.957	0.887	0.0315	0.0315	1.093	1.034	0.0315	0.0315	1.414	1.321	0.0315	0.0315	0.923	0.99
DPYEAcDGAH-O60701-C6zsw-TMT	1.431	1.199	1.257	1.237	0.812	0.847	0.861	0.888	0.959	0.805	0.904	0.948	0.758	0.496	0.753	0.863	1.01	0.661	0.978	1.16
TSSAQVEGGVhSLHSYEK-H0Y4R1-H11zsw-TMT	1.119	0.0315	0.0315	0.981	1.49	0.0315	0.0315	1.505	1.931	0.0315	0.0315	2.428	1.325	0.0315	0.0315	1.381	1.382	0.0315	0.0315	1.627
IEGYEDQVLITEhGDLGNSR-A8K0T9-H13zsw-TMT	0.9	1.29	0.712	0.914	1.26	1.715	1.373	1.301	0.949	1.686	1.218	1.196	0.934	1.948	1.106	1.177	1.12	1.877	1.318	1.396
VDINTEDLEDGTcR-Q5HY54-C13zsw-TMT	0.988	0.0315	0.874	0.0315	0.901	0.0315	0.847	0.0315	0.844	0.0315	0.818	0.0315	0.9	0.0315	1.008	0.0315	0.96	0.0315	1.096	0.0315
ThILLFLPK-P07237-H2zsw-TMT	0.917	0.916	0.851	0.797	0.953	0.993	0.862	0.941	1.264	1.273	1.21	1.146	0.841	0.788	0.881	0.898	0.815	0.866	0.811	0.863
TLhPDLGTDKDKEQWK-P00338-H3zsw-TMT	1.16	1.092	1.399	0.937	1.125	1.175	1.074	1.208	1.164	1.145	1.166	1.085	0.781	0.728	0.789	0.866	2.044	1.855	1.554	1.33
ETNLDSLPLVDThSK-P08670-H13zsw-TMT	0.955	1.084	0.0315	1.035	1.11	1.175	0.0315	1.242	1.18	1.174	0.0315	1.377	1.204	1.101	0.0315	1.218	1.268	1.323	0.0315	1.338
VSLDVNhFAPDELTVK-B4DL87-H7zsw-TMT	0.0315	0.842	0.949	0.892	0.0315	0.669	0.923	0.908	0.0315	0.742	0.792	0.742	0.0315	0.854	0.896	0.733	0.0315	0.627	1.077	0.827
AAhSEGNTTAGLDMR-P78371-H3zsw-TMT	0.932	0.936	0.931	0.819	1.024	0.852	1.002	1.027	1.041	1.085	0.966	1.45	1.246	1.443	1.16	2.052	1.312	1.806	1.461	1.803
SIcEVLDLER-B4DFG0-C3zsw-TMT	0.0315	0.0315	0.989	0.982	0.0315	0.0315	0.903	0.949	0.0315	0.0315	0.841	0.846	0.0315	0.0315	1.173	1.069	0.0315	0.0315	1.008	1.002
ENIVEAIIhSPELIR-O95373-H9zsw-TMT	1.219	1.249	0.0315	1.029	0.915	0.823	0.0315	0.832	0.57	0.678	0.0315	0.558	1.17	1.133	0.0315	1.255	1.078	0.858	0.0315	1.027
GhNGWVTQIATTPQFPDMILSASR-P63244-H2zsw-TMT	1.107	1.043	1.015	1.041	0.933	0.988	0.925	0.887	0.932	0.869	0.681	0.986	1.212	1.072	0.939	0.974	0.981	0.976	0.69	0.787
FDVNTSAVQVLIEhIGNLDR-Q00610-H14zsw-TMT	0.0315	0.0315	0.815	1.304	0.0315	0.0315	0.906	0.873	0.0315	0.0315	0.699	0.73	0.0315	0.0315	1.01	1.131	0.0315	0.0315	1.032	1.115
TTGIVMDSGDGVThTVPIYEGY-Q8WVW5-H14zsw-TMT	0.0315	0.0315	1.206	0.84	0.0315	0.0315	1.044	1.656	0.0315	0.0315	0.94	1.247	0.0315	0.0315	0.94	1.363	0.0315	0.0315	1.065	1.876
LhIIEVGTPPTGNQPFPK-Q00610-H2zsw-TMT	0.861	0.981	0.981	1.12	1.261	0.957	1.339	1.029	1.393	1.172	1.074	1.036	1.135	0.968	0.855	0.94	1.131	0.922	0.889	0.933
ALLYLcGGDD-P07355-C6zsw-TMT	0.951	0.947	0.0315	0.799	0.625	0.583	0.0315	0.395	0.515	0.424	0.0315	0.357	0.694	0.637	0.0315	0.502	0.748	0.784	0.0315	0.649
hHAAYVNNLNVTEEK-Q7Z7M4-H1zsw-TMT	1.086	0.98	1.162	1.045	3.129	3.546	2.974	2.877	2.147	2.412	1.974	1.846	0.897	1.011	0.953	0.958	1.072	1.327	1.3	1.11
DNPGVVTcLDEAR-P22314-C8zsw-TMT	0.995	0.924	0.976	0.976	0.862	0.792	0.775	0.808	0.831	0.888	0.897	0.971	1.14	0.972	0.987	1.173	0.857	0.793	0.861	0.885
GANDFMcDEMER-P17987-C7zsw-TMT	1.039	0.913	0.893	1.101	0.957	0.974	0.894	0.958	1.03	0.905	0.945	1.001	1.107	1.09	1.105	1.062	0.854	0.898	0.975	0.879
FSGWYDADLSPAGhEEA-P18669-H14zsw-TMT	0.0315	0.852	0.0315	1.067	0.0315	1.023	0.0315	0.963	0.0315	1.094	0.0315	1.416	0.0315	1.222	0.0315	1.054	0.0315	1.085	0.0315	1.227
TTIPEEEEEEEEAAGVVVEEELFhQQGTPR-P20700-H24zsw-TMT	0.986	0.925	0.943	0.79	1.667	1.117	1.099	1.173	1.127	1.096	0.928	1.014	0.904	0.713	0.897	0.708	0.915	1.224	1.002	0.954
IIPTLEEYQhYK-B4DUQ1-H10zsw-TMT	0.0315	0.0315	1.124	0.977	0.0315	0.0315	1.787	1.52	0.0315	0.0315	1.592	1.39	0.0315	0.0315	1.208	1.02	0.0315	0.0315	1.146	1.042
AAEcLSEK-Q9BV61-C4zsw-TMT	0.979	0.0315	0.0315	1.048	1.19	0.0315	0.0315	1.179	0.912	0.0315	0.0315	0.938	0.896	0.0315	0.0315	1.061	1.081	0.0315	0.0315	1.123
IGGVILFhETLYQK-P04075-H8zsw-TMT	1.012	0.941	1.087	1.001	0.818	0.702	0.688	0.806	0.869	0.811	0.846	0.99	0.883	0.799	0.762	0.895	0.793	0.801	0.752	0.736
AFhNEAQVNPER-P17987-H3zsw-TMT	0.883	0.821	0.93	0.857	0.998	1.401	1.141	1.219	0.821	1.141	0.952	1.014	0.805	1.075	1.026	1.116	0.809	1.203	1.168	1.181
TYEEGLKhEANNPQLK-A8K690-H8zsw-TMT	0.0315	0.557	0.0315	0.737	0.0315	1.419	0.0315	1.386	0.0315	1.586	0.0315	1.333	0.0315	0.947	0.0315	0.884	0.0315	1.495	0.0315	1.137
DNEVDFQEYcVF-P26447-C10zsw-TMT	1.16	1.058	1.183	1.033	0.647	0.502	0.597	0.558	0.473	0.419	0.502	0.453	0.613	0.464	0.759	0.642	1.076	0.98	1.152	1.051
ILYSQcGDVMR-G8JLA2-C6zsw-TMT	0.0315	0.0315	0.922	0.872	0.0315	0.0315	0.789	0.956	0.0315	0.0315	0.857	0.981	0.0315	0.0315	1.272	1.126	0.0315	0.0315	1.083	0.972
KGDVKPLAEQIAITAGcK-P23141-C17zsw-TMT	0.987	0.0315	1.073	0.9	0.649	0.0315	0.576	0.693	0.842	0.0315	0.746	0.74	0.827	0.0315	0.771	0.691	0.725	0.0315	0.752	0.675
VNQIGSVTESIQAcK-P06733-C14zsw-TMT	0.923	0.0315	0.904	0.0315	0.633	0.0315	0.854	0.0315	0.56	0.0315	0.708	0.0315	0.744	0.0315	0.959	0.0315	0.577	0.0315	0.739	0.0315
YDVDTLDMVFLDhWK-B8XPJ7-H13zsw-TMT	0.944	1.07	1.124	1.036	1.237	1.162	1.229	1.178	1.07	1.031	1.116	1.184	1.152	1.24	1.024	0.817	1.045	0.942	1.01	0.902
hGVYNPNK-Q75MT9-H1zsw-TMT	0.771	0.745	0.935	0.0315	1.86	2.1	1.811	0.0315	1.444	1.885	1.425	0.0315	0.736	0.667	0.726	0.0315	0.862	0.897	0.934	0.0315
ISLGLPVGAVINcADNTGAK-Q9BTQ7-C13zsw-TMT	1.245	0.0315	0.0315	1.161	0.724	0.0315	0.0315	0.858	0.952	0.0315	0.0315	0.897	1.112	0.0315	0.0315	1.052	1.005	0.0315	0.0315	0.761
TVPFcSTFAAFFTR-B4E022-C5zsw-TMT	1.128	1.133	1.174	1.025	0.751	0.732	0.641	0.591	0.755	0.653	0.711	0.62	1.004	1.03	1.165	1.027	0.815	0.735	0.757	0.682
TTGIVmDSGDGVThTVPIYEGYALPhAILR-Q8WVW5-M6Oxidation H14zsw-TMT H26zsw-TMT	0.0315	0.0315	0.769	0.814	0.0315	0.0315	1.168	0.944	0.0315	0.0315	0.856	0.764	0.0315	0.0315	1.403	1.066	0.0315	0.0315	0.88	0.787
VVGFhVLGPNAGEVTQGFAAALK-E9PIR7-H5zsw-TMT	1.023	0.831	0.0315	1.287	0.69	0.626	0.0315	0.663	0.863	0.707	0.0315	0.717	0.716	0.761	0.0315	0.781	0.942	0.79	0.0315	1.219
EENVGLHQTLDQTLNELNcI-P67936-C19zsw-TMT	0.959	0.833	0.808	1.159	0.958	0.955	0.973	0.975	0.761	0.505	0.649	0.718	0.852	0.673	0.78	0.852	1.13	0.701	0.975	1.095
EDSVKPGAhLTVK-B4E3E6-H9zsw-TMT	1.098	0.867	0.839	0.797	1.724	1.697	1.397	0.752	2.165	1.883	1.488	0.766	0.812	0.899	0.741	0.315	1.227	1.146	0.705	0.162
AILPcLK-A8K7F6-C5zsw-TMT	1.106	0.0315	0.0315	1.111	0.997	0.0315	0.0315	1.062	0.885	0.0315	0.0315	0.931	1.083	0.0315	0.0315	1.388	1.104	0.0315	0.0315	1.11
HGLLVPNNTTDQELQhIR-P56537-H16zsw-TMT	0.0315	1.063	1.05	1.08	0.0315	1.17	1.13	1.317	0.0315	1.322	1.206	1.378	0.0315	1.025	0.957	1.003	0.0315	0.882	1.005	0.959
TVIGDhGDELFSVFGAPFLK-P23141-H6zsw-TMT	0.825	0.947	0.914	0.918	0.604	0.62	0.656	0.589	0.724	0.694	0.733	0.646	0.587	0.631	0.709	0.689	0.601	0.632	0.682	0.62
YWPQEAGEYAVHVLcNSEDIR-Q5HY54-C15zsw-TMT	0.923	1.021	1.067	1.247	0.802	0.817	0.648	0.719	0.737	0.7	0.6	0.742	1.024	0.85	0.761	0.831	0.924	0.746	0.834	0.794
ADcTITMADSDFLALMTGK-B2R761-C3zsw-TMT	1.023	0.899	0.965	1.032	1.316	1.197	1.089	1.178	0.972	0.806	0.916	0.809	0.797	0.817	0.894	0.665	1.188	1.04	1.241	1.085
AAAPAPEEEMDEcEQALAAEPK-P26641-C13zsw-TMT	1.028	1.076	1.051	1.033	1.116	0.892	0.42	0.928	0.972	0.833	0.411	0.977	1.098	1.138	0.395	1.031	1.357	1.305	0.115	1.187
HVFWGSGShTLPALLENLK-A8K6Q8-H9zsw-TMT	1.081	1.013	0.877	0.992	0.965	0.92	0.763	0.763	1.067	1.209	0.859	1.001	1.19	1.105	0.935	1.199	0.868	1.005	0.689	0.813
ShGSQETDEEFDAR-P20674-H2zsw-TMT	0.811	0.937	0.0315	0.739	1.866	1.202	0.0315	1.33	2.088	1.722	0.0315	1.553	1.353	1.11	0.0315	0.878	2.22	1.581	0.0315	1.172
ALDVMVSTFhK-P26447-H10zsw-TMT	1.08	1.017	1.104	1.009	0.333	0.384	0.347	0.428	0.356	0.365	0.345	0.44	0.455	0.389	0.43	0.586	0.459	0.448	0.406	0.573
LDVMVSTFhK-P26447-H9zsw-TMT	1.28	0.0315	0.0315	1.103	0.458	0.0315	0.0315	0.309	0.575	0.0315	0.0315	0.453	0.453	0.0315	0.0315	0.508	0.953	0.0315	0.0315	0.695
LVSSPccIVTSTYGWTANMER-P08238-C6zsw-TMT C7zsw-TMT	1.013	0.0315	0.998	1.08	0.781	0.0315	0.765	0.759	0.897	0.0315	1.035	0.9	1.977	0.0315	1.291	1.463	0.85	0.0315	0.861	0.675
LLcGLLAER-P14174-C3zsw-TMT	1.289	1.433	1.488	1.44	0.714	0.789	0.876	0.799	0.469	0.663	0.76	0.682	0.535	1.184	1.331	1.297	0.554	0.807	0.938	0.975
HDIIDDINSGAVEcPAS-P30050-C14zsw-TMT	0.0315	1.036	0.852	0.0315	0.0315	1.163	1.04	0.0315	0.0315	1.24	0.748	0.0315	0.0315	0.831	0.598	0.0315	0.0315	0.822	0.547	0.0315
SQLDIIIhSLK-P13010-H8zsw-TMT	1.06	1.081	0.909	1.108	1.173	1.199	0.788	0.952	1.05	1.073	0.781	0.931	1.056	1.104	0.759	1.005	0.939	0.944	0.522	0.818
LNEDMAcSVAGITSDANVLTNELR-H0YLS6-C7zsw-TMT	0.0315	0.0315	0.958	1.198	0.0315	0.0315	1.116	1.248	0.0315	0.0315	0.759	0.917	0.0315	0.0315	0.919	0.925	0.0315	0.0315	1.227	1.433
ILHVDNhIGISIAGLTADAR-P25786-H7zsw-TMT	0.929	1.034	0.0315	0.0315	0.734	0.463	0.0315	0.0315	0.867	0.691	0.0315	0.0315	1.024	0.694	0.0315	0.0315	0.868	0.541	0.0315	0.0315
STPSGFTLDDVIQTGVDNPGhPYIM-P12277-H21zsw-TMT	0.0315	0.946	1.241	0.0315	0.0315	1.421	1.32	0.0315	0.0315	1.265	1.405	0.0315	0.0315	1.365	1.344	0.0315	0.0315	1.288	1.191	0.0315
LIASYcNVGDIEGASK-P42704-C6zsw-TMT	1.002	0.0315	1.005	0.0315	1.244	0.0315	1.207	0.0315	1.369	0.0315	1.161	0.0315	1.135	0.0315	1.001	0.0315	1.102	0.0315	0.945	0.0315
MRPGVAcSVSQAQK-P32969-C7zsw-TMT	0.0315	1.057	0.0315	0.605	0.0315	1.253	0.0315	0.399	0.0315	1.088	0.0315	0.148	0.0315	1.123	0.0315	0.0315	0.0315	1.333	0.0315	0.0315
hIDCAYVYQNEhEVGEAIQEK-O60218-H1zsw-TMT H12zsw-TMT	1.426	1.631	1.69	2.43	0.242	0.285	0.347	0.296	0.379	0.431	0.531	0.361	0.309	0.421	0.477	0.382	0.313	0.426	0.378	0.377
QYASLTGTQALPPLFSLGYhQSR-Q14697-H20zsw-TMT	0.0315	0.989	1.239	0.0315	0.0315	1.139	1.403	0.0315	0.0315	1.002	1.098	0.0315	0.0315	1.113	0.914	0.0315	0.0315	1.068	0.785	0.0315
EQQEAIEhIDEVQNEIDR-A0A024R895-H8zsw-TMT	0.0315	0.0315	0.737	0.767	0.0315	0.0315	1.294	1.293	0.0315	0.0315	0.912	1.05	0.0315	0.0315	1.012	1.08	0.0315	0.0315	1.281	1.384
LQVEPAVDTSGVQcYGPGIEGQGVFR-Q5HY54-C14zsw-TMT	1.05	0.937	0.755	0.863	0.82	0.692	0.703	0.664	0.617	0.54	0.599	0.625	1.136	0.951	0.791	0.777	1.513	1.652	1.465	1.26
ADEASELAcPTPK-A0A0U1RQF0-C9zsw-TMT	1.071	1.033	0.996	1.091	0.877	0.902	0.941	0.929	1.145	1.145	1.292	1.278	0.935	0.91	1.101	0.763	0.863	0.789	0.925	0.96
QhVTEAFQFhF-A0A286YF22-H2zsw-TMT H10zsw-TMT	1.157	0.0315	0.0315	1.239	0.908	0.0315	0.0315	0.953	1.283	0.0315	0.0315	1.478	1.29	0.0315	0.0315	1.339	0.73	0.0315	0.0315	1.116
LGEVSVESENYVQAVEEFQScLNLQEQYLEAHDR-P49321-C21zsw-TMT	0.0315	0.0315	0.0315	0.0315	0.0315	1.859	0.0315	0.69	0.0315	0.754	0.0315	0.484	0.0315	0.827	0.0315	0.0315	0.0315	1.295	0.0315	1.242
ShMMDVQGSTQDSAIK-P13667-H2zsw-TMT	1.096	0.99	0.892	0.913	1.582	1.624	1.591	1.144	1.901	1.874	2.047	1.005	1.223	1.188	1.111	1.124	1.28	1.098	1.146	1.132
FMADIDLDPGcTLNK-Q5M7Z9-C11zsw-TMT	1.399	1.149	1.287	0.973	1.056	1.222	1.089	0.799	1.308	0.955	1.155	0.941	1.899	1.792	1.377	1.228	1.31	1.195	1.207	0.978
EPPLLLGVLhPN-Q9HDC9-H10zsw-TMT	1.432	1.183	0.0315	0.0315	0.566	0.592	0.0315	0.0315	0.758	0.734	0.0315	0.0315	1.021	0.995	0.0315	0.0315	0.88	0.815	0.0315	0.0315
YEPFSFADDIGSNNcGYYDLQAVLTHQGR-A6NJA2-C15zsw-TMT	0.0315	0.913	0.79	0.0315	0.0315	0.774	0.59	0.0315	0.0315	0.768	0.325	0.0315	0.0315	1.07	0.604	0.0315	0.0315	1.156	0.216	0.0315
FIThAPPGEFNEVFNDVR-A8K0T9-H4zsw-TMT	0.0315	0.979	1.049	1.026	0.0315	0.95	0.895	0.884	0.0315	0.842	1.004	0.928	0.0315	1.102	1.078	0.89	0.0315	0.85	0.836	0.878
GFSDEDNTWEPEENLDcPDLIAEFLQSQK-K7ELA4-C17zsw-TMT	1.558	1.001	1.553	0.0315	2.792	1.803	1.711	0.0315	0.743	0.976	0.783	0.0315	1.251	0.7	0.891	0.0315	1.989	1.333	1.536	0.0315
TTSSANNPNLMYQDEcDR-A0A1X7SBZ2-C16zsw-TMT	0.0315	0.628	0.591	1.016	0.0315	1.529	1.516	1.951	0.0315	1.235	1.839	1.51	0.0315	1.091	1.012	1.357	0.0315	1.154	1.276	1.44
hEMLPASLIQAQR-P52209-H1zsw-TMT	0.759	0.0315	1.069	0.938	0.946	0.0315	1.203	0.922	0.741	0.0315	1.083	0.975	0.486	0.0315	0.735	0.774	0.505	0.0315	1.048	0.808
QTVADQVLVGSYcVF-P56537-C13zsw-TMT	1.002	1.126	1.142	0.827	0.909	1.021	1.001	0.961	0.7	0.93	0.876	0.815	0.791	0.988	0.946	0.874	0.861	0.96	0.833	0.808
SSEHINEGETAMLVcK-A0A087X2B5-C15zsw-TMT	0.829	0.0315	1.001	0.0315	1.137	0.0315	1.201	0.0315	1.324	0.0315	1.241	0.0315	1.197	0.0315	1.404	0.0315	1.364	0.0315	1.547	0.0315
IhQIEYAMEAVK-P25786-H2zsw-TMT	0.81	0.959	1.195	1.032	1.286	1.18	1.224	1.172	1.202	1.4	1.229	1.177	1.174	1.033	1.09	1.121	1.433	1.51	1.24	1.047
MMITSQDVLhSWAVPTLGLK-B2YKU2-H10zsw-TMT	0.0315	0.922	1.028	1.097	0.0315	0.727	0.821	0.945	0.0315	0.881	1.168	1.107	0.0315	0.887	0.885	0.93	0.0315	0.808	0.938	0.868
VQEQVhTLLSQDQAQAAR-Q07065-H6zsw-TMT	0.648	0.83	0.879	0.605	1.333	1.516	1.564	1.532	1.352	1.52	1.947	1.447	0.851	0.796	0.981	0.673	0.724	1.079	1.297	1.102
AVELLGDIVQNcSLEDSQIEK-P31930-C12zsw-TMT	0.0315	0.972	0.926	0.948	0.0315	0.9	0.892	0.713	0.0315	1.105	1.225	1.065	0.0315	0.888	0.936	0.781	0.0315	0.975	1.051	0.879
TYDAASYIcEAAFDEVK-P42166-C9zsw-TMT	1.079	0.0315	1.101	1.18	0.803	0.0315	0.751	0.743	0.834	0.0315	0.826	0.959	0.882	0.0315	0.851	0.755	0.839	0.0315	0.64	0.721
NFESLSEAFSVASAAAVLShNR-P04844-H20zsw-TMT	1.229	0.831	1.053	1.131	1.207	1.169	1.087	1.351	1.016	0.992	0.901	0.943	1.073	1.07	1.042	1.016	1.098	0.817	0.887	0.945
hFVALSTNTTK-B4DE36-H1zsw-TMT	0.928	0.0315	0.0315	0.905	0.893	0.0315	0.0315	0.829	0.857	0.0315	0.0315	0.714	0.7	0.0315	0.0315	0.741	1.091	0.0315	0.0315	0.949
VhYENNSPFLTITSM-P04843-H2zsw-TMT	0.984	0.0315	0.987	1.005	1.101	0.0315	1.137	1.194	1.187	0.0315	1.206	1.229	1.002	0.0315	0.988	0.919	0.943	0.0315	0.997	0.955
LVEGILhAPDAGWGNLVYVVNYPK-B1AKP7-H7zsw-TMT	1.344	0.883	0.853	0.0315	1.023	0.976	1.06	0.0315	1.106	0.904	0.846	0.0315	1.162	1.124	0.984	0.0315	0.973	1.002	0.728	0.0315
NVNVQNFhISWK-O43707-H8zsw-TMT	0.843	1.155	0.831	0.897	0.874	0.957	0.903	1.146	0.859	0.975	0.835	0.959	0.774	0.913	0.843	0.894	0.838	0.865	0.659	1.042
VFITDDFhDMMPK-Q5CAQ5-H8zsw-TMT	1.091	1.04	0.0315	1.059	1.212	1.159	0.0315	1.276	1.287	1.233	0.0315	1.341	1.151	1.058	0.0315	1.087	0.989	0.875	0.0315	0.954
GADIMYTGTVDcWR-P12236-C12zsw-TMT	1.174	1.114	1.042	1.088	0.928	0.872	0.823	0.707	0.961	0.946	0.803	0.796	1.257	1.059	1.047	1.032	1.053	0.991	0.923	1.011
FQEhLQLQNLGINPANIGFSTLTMESDK-Q00610-H4zsw-TMT	0.0315	1.111	1.259	0.973	0.772	0.912	1.011	0.777	0.384	0.785	0.928	0.914	0.0315	1.13	0.975	0.879	0.0315	0.921	1.013	0.801
MWDPhNDPNAQGDAFK-A8KAQ5-H5zsw-TMT	1.011	0.91	0.0315	0.963	1.254	1.094	0.0315	1.061	1.092	1.282	0.0315	0.915	1.015	1.097	0.0315	1.006	1.096	1.33	0.0315	0.85
WcSWSLSQAR-B4E2Z3-C2zsw-TMT	0.875	0.866	0.988	0.963	1.022	0.839	0.856	0.747	1.108	1.066	1.068	0.972	1.043	1.054	1.182	1.206	0.707	0.733	0.859	0.888
ALLDSLQLGPDSLTVhLIHEVTK-Q14697-H16zsw-TMT	0.967	0.987	0.0315	0.0315	0.919	1.012	0.0315	0.0315	0.664	0.782	0.0315	0.0315	0.89	0.695	0.0315	0.0315	0.757	1.056	0.0315	0.0315
LSGAEPDDEEYQEFEEMLEhAESAQDFASR-K7EPE7-H20zsw-TMT	0.771	0.0315	0.0315	0.855	0.848	0.0315	0.0315	0.749	0.781	0.0315	0.0315	0.767	0.895	0.0315	0.0315	0.862	1.142	0.0315	0.0315	0.756
ITFhGEGDQEPGLEPGDIIIVLDQK-P31689-H4zsw-TMT	0.0315	1.136	0.98	1.054	0.0315	0.869	0.79	0.885	0.0315	0.87	0.93	1.034	0.0315	1.048	0.869	0.966	0.0315	1.025	0.806	0.924
FNYSVQEESDTcLGGK-Q9P287-C12zsw-TMT	0.0315	0.897	1.181	0.0315	0.0315	1.127	1.394	0.0315	0.0315	1.187	1.236	0.0315	0.0315	0.925	1.203	0.0315	0.0315	1.116	1.171	0.0315
SGSPANLAVYTALLQPhDR-A0A024RB99-H17zsw-TMT	0.0315	1.258	1.086	1	0.0315	1.012	0.853	0.884	0.0315	0.945	0.9	0.864	0.0315	1.153	0.889	0.755	0.0315	0.819	0.795	0.656
TVDLSShLAK-P04843-H7zsw-TMT	0.919	0.0315	0.851	1.037	2.805	0.0315	2.658	2.492	1.752	0.0315	1.521	1.726	1.674	0.0315	1.353	1.552	2.28	0.0315	1.717	1.675
SNTGGQAFPQCVFDhWQILPGDPFDNSSR-P13639-H15zsw-TMT	1.172	0.0315	1.633	0.0315	1.186	0.0315	1.1	0.0315	0.688	0.0315	0.763	0.0315	1.135	0.0315	1.078	0.0315	0.919	0.0315	0.704	0.0315
ScSPELQQK-P16152-C2zsw-TMT	0.941	0.738	0.0315	0.0315	0.887	0.758	0.0315	0.0315	0.622	0.466	0.0315	0.0315	0.682	0.577	0.0315	0.0315	0.643	0.622	0.0315	0.0315
AVLFcLSEDK-G3V1A4-C5zsw-TMT	0.0315	0.0315	0.901	1.042	0.0315	0.0315	0.794	0.741	0.0315	0.0315	0.774	0.803	0.0315	0.0315	0.931	1.087	0.0315	0.0315	0.768	0.864
VFIMDNcEELIPEYLNFIR-P07900-C7zsw-TMT	0.908	0.753	0.715	0.819	1.523	1.608	1.312	1.171	0.797	0.827	0.671	0.654	1.273	1.084	1.151	1.004	1.353	1.368	1.176	0.971
VTVAGGVhISGLHTESAPR-A0A0U1RQF0-H8zsw-TMT	1.116	0.986	0.0315	0.0315	0.897	0.771	0.0315	0.0315	1.111	0.752	0.0315	0.0315	1.512	1.501	0.0315	0.0315	1.193	0.892	0.0315	0.0315
FDhILYTGSTGVGK-C9JMC5-H3zsw-TMT	1.234	1.153	0.0315	0.0315	0.989	0.751	0.0315	0.0315	0.92	0.82	0.0315	0.0315	0.848	0.463	0.0315	0.0315	0.967	0.765	0.0315	0.0315
SQETEcTYFSTPLLLGK-Q75MT9-C6zsw-TMT	1.059	1.004	1.084	0.0315	1.213	1.01	0.933	0.0315	0.981	0.857	0.708	0.0315	1.06	0.864	0.955	0.0315	0.734	0.71	0.62	0.0315
MVLAAAGGVEhQQLLDLAQK-P31930-H11zsw-TMT	0.974	0.87	0.855	0.932	0.952	0.812	0.897	1.062	1.155	1.051	1.014	1.42	1.075	0.72	0.741	1.151	0.956	0.544	0.773	0.968
hHGPQTLYLPVTLSSIPVFQR-Q14697-H1zsw-TMT	1.108	1.141	1.018	1.012	0.975	1.241	0.834	0.869	0.907	0.988	0.984	0.977	1.028	1.091	1.002	0.999	0.908	1.123	0.738	0.826
TVEEVLGhFGVNESTGLSLEQVK-P16615-H8zsw-TMT	1.079	0.943	0.96	0.878	0.827	0.844	0.798	0.808	0.888	0.944	0.937	0.82	0.963	0.943	0.875	0.912	0.916	0.666	0.933	0.81
hTDNVIQWLNAMDEIGLPK-A4QPB0-H1zsw-TMT	0.0315	0.0315	1.007	1.04	0.0315	0.0315	0.959	0.899	0.0315	0.0315	0.84	0.939	0.0315	0.0315	0.813	1.019	0.0315	0.0315	0.978	1.235
LDALVAEEhLTVDAR-Q9UKK9-H9zsw-TMT	0.979	0.799	0.959	1.095	0.929	0.856	1.008	1	0.992	0.996	1.173	1.246	0.962	0.973	0.961	1.165	1.556	1.249	1.436	1.358
VAPEEhPVLLTEAPLNPK-Q8WVW5-H6zsw-TMT	0.0315	0.0315	0.825	0.788	0.0315	0.0315	1.703	1.543	0.0315	0.0315	1.231	1.121	0.0315	0.0315	1.099	1.174	0.0315	0.0315	1.551	1.434
YVEPIEDVPcGNIVGLVGVDQFLVK-P13639-C10zsw-TMT	1.459	1.242	1.291	1.2	0.878	0.817	0.985	0.826	0.598	0.44	0.554	0.596	1.005	0.977	0.891	1.1	1.079	1.061	0.878	1.027
EhALTSGTIK-R4GMY8-H2zsw-TMT	0.882	0.841	0.562	0.657	1.459	1.124	1.296	1.535	1.273	0.962	1.058	1.389	1.019	0.889	0.786	0.991	1.264	0.927	1.05	1.308
NFYVEhPEVAR-A0A1X7SBZ2-H6zsw-TMT	1.006	0.965	0.0315	0.786	1.344	1.155	0.0315	1.255	1.181	1.171	0.0315	1.213	0.905	0.771	0.0315	1.055	1.06	0.919	0.0315	0.966
IDFEDVIAEPEGThSFDGIWK-C9JKI3-H14zsw-TMT	0.444	0.0315	0.623	0.0315	0.272	0.0315	0.373	0.0315	0.222	0.0315	0.352	0.0315	0.766	0.0315	0.388	0.0315	0.59	0.0315	0.332	0.0315
QVQSLTcEVDALK-P08670-C7zsw-TMT	1.022	1.017	0.906	0.707	1.802	1.457	1.409	1.257	0.994	0.955	1.094	0.763	1.72	1.11	1.257	1.485	2.235	1.037	1.237	1.477
AVVIcTEWDMFK-O60701-C5zsw-TMT	0.0315	0.0315	1.45	1.167	0.0315	0.0315	0.732	0.626	0.0315	0.0315	0.915	0.788	0.0315	0.0315	0.842	0.833	0.0315	0.0315	0.666	0.705
ALSDhhIYLEGTLLKPN-P04075-H5zsw-TMT H6zsw-TMT	1.036	0.98	1.081	1.028	0.62	0.543	0.589	0.621	0.86	0.67	0.776	0.811	1.148	1.07	0.987	1.003	0.751	0.759	0.733	0.795
VQhQDALQISDVVMASLLR-B2RBR9-H3zsw-TMT	0.944	1.201	0.996	1.163	0.925	1.233	0.934	1.097	0.883	1.303	0.944	1.151	1.019	1.336	1.124	1.053	1.008	1.232	0.861	1.083
GcAVVEFK-P52272-C2zsw-TMT	0.0315	1.059	1.121	0.0315	0.0315	1.022	1.166	0.0315	0.0315	0.97	1.184	0.0315	0.0315	1.067	1.257	0.0315	0.0315	0.915	1.121	0.0315
GFcFITYTDEEPVKK-B4DTA2-C3zsw-TMT	0.924	0.941	0.923	0.894	0.989	1.104	0.965	0.795	1.059	1.236	1.017	0.859	1.03	1.12	1.05	1.007	0.981	0.775	0.945	0.797
FVINYDYPNSSEDYVhR-A0A1X7SBZ2-H16zsw-TMT	0.826	0.917	0.981	0.933	1.599	1.34	1.433	1.465	1.064	1.234	1.155	1.174	0.862	1.009	0.926	1.044	0.881	1.123	1.033	1.102
YVEcSALTQK-P60953-C4zsw-TMT	0.0315	1.046	0.997	0.0315	0.0315	1.115	1.182	0.0315	0.0315	1.075	1.011	0.0315	0.0315	0.811	0.974	0.0315	0.0315	0.83	0.962	0.0315
WcEYGLTFTEK-A0A0A0MR02-C2zsw-TMT	1.245	0.0315	0.0315	0.687	0.679	0.0315	0.0315	0.591	0.844	0.0315	0.0315	0.669	1.325	0.0315	0.0315	0.968	1.536	0.0315	0.0315	1.045
IKPhLMSQELPEDWDK-P07237-H4zsw-TMT	1.054	0.845	0.0315	0.932	1.387	1.451	0.0315	1.402	1.673	1.69	0.0315	1.86	0.995	0.783	0.0315	1.032	1.073	1.179	0.0315	1.459
FQSShhPTDITSLDQYVER-Q5CAQ5-H5zsw-TMT H6zsw-TMT	1.054	1.036	0.816	0.853	1.602	1.517	1.723	1.561	2.016	1.982	2.115	1.877	1.226	1.387	1.519	1.311	0.864	1.226	1.198	1.173
TVIGDhGDELFSVFGAPF-P23141-H6zsw-TMT	0.806	0.777	0.797	0.551	0.775	0.522	0.592	0.435	0.837	0.692	0.758	0.389	0.607	0.424	0.433	0.271	0.889	0.479	0.614	0.341
GDQENVhPDVMLVQPR-B2RBR9-H7zsw-TMT	0.757	0.956	0.0315	0.803	1.436	1.514	0.0315	1.306	2.134	2.169	0.0315	1.472	0.967	1.185	0.0315	1.012	1.526	1.569	0.0315	1.402
DhQYQFLEDAVR-B2R8R5-H2zsw-TMT	1.001	1.065	1.029	0.0315	1.721	1.808	2.228	0.0315	1.452	1.064	1.586	0.0315	1.112	0.999	1.216	0.0315	1.104	0.873	1.057	0.0315
EQAGGDATENFEDVGhSTDAR-Q59F44-H16zsw-TMT	1.079	0.951	1.158	1.174	1.686	1.287	1.685	1.698	2.059	1.805	2.658	1.894	1.001	0.668	1.259	1.513	1.432	0.807	1.357	1.329
DcVGPEVEK-P00558-C2zsw-TMT	1.169	1.206	0.806	0.885	0.814	0.855	0.455	0.577	0.889	0.842	0.35	0.345	0.929	0.974	0.424	0.506	0.984	1.045	1.23	0.256
LESGMQNMSIhTK-P05787-H11zsw-TMT	0.737	0.825	0.774	0.644	1.007	1.039	1.082	1.099	1.022	0.923	0.988	1.107	0.745	0.729	0.901	0.736	1.146	1.011	1.235	1.336
EAVcEVALDYK-D6W5C0-C4zsw-TMT	1.079	0.886	0.969	1.075	1.133	1.067	1.127	1.042	0.918	1.055	1.108	1.339	1.028	0.845	1.08	0.955	0.751	0.885	1.029	0.814
FVDGLMIhSGDPVNYYVDTAVR-P23396-H8zsw-TMT	0.9	1.055	0.966	0.961	1.032	0.937	1.087	1.038	0.991	0.931	0.782	1.09	1.29	1.343	1.276	0.969	1.102	1.124	0.994	1.092
hLIPAANTGESK-P62258-H1zsw-TMT	1.037	0.755	0.0315	0.746	1.159	1.093	0.0315	1.124	1.047	0.966	0.0315	0.925	0.848	0.622	0.0315	0.813	1.157	0.941	0.0315	0.976
NIELIcQENEGENDPVLQR-B4DM33-C6zsw-TMT	0.0315	0.0315	1.072	1.227	0.0315	0.0315	0.956	1.077	0.0315	0.0315	1.079	1.291	0.0315	0.0315	1.123	1.222	0.0315	0.0315	1.083	1.265
DNhLLGTFDLTGIPPAPR-P11021-H3zsw-TMT	1.147	0.0315	1	0.859	0.724	0.0315	0.708	0.858	0.882	0.0315	0.737	0.916	0.837	0.0315	0.821	0.716	0.777	0.0315	0.965	0.851
DhAVVVGVYRPPPK-Q96BS4-H2zsw-TMT	0.883	0.971	1.117	0.773	1.463	1.435	1.387	1.542	1.669	1.649	1.698	1.478	0.976	0.887	1.123	1.021	1.182	1.199	1.185	1.126
SEhPGLSIGDTAK-Q5U071-H3zsw-TMT	1	1.039	0.0315	0.0315	1.397	1.538	0.0315	0.0315	1.316	1.436	0.0315	0.0315	0.866	0.705	0.0315	0.0315	1.124	1.108	0.0315	0.0315
hTAMVSWGGVSIPNSPFR-Q5HY54-H1zsw-TMT	0.806	0.98	0.872	0.924	0.667	0.79	0.78	0.86	1.036	1.182	0.948	0.955	0.972	1.205	0.912	0.958	0.912	0.935	0.782	0.883
hMLPSGFR-D3YTB1-H1zsw-TMT	0.0315	0.881	0.922	0.794	0.0315	0.724	0.867	0.743	0.0315	0.679	0.67	0.614	0.0315	0.765	0.868	0.79	0.0315	0.61	0.757	0.648
hLNEIDLFHcIDPNDSK-Q15185-H1zsw-TMT C10zsw-TMT	1.536	1.375	1.289	1.212	0.472	0.559	0.42	0.45	0.602	0.651	0.546	0.719	0.898	1.014	0.75	0.692	0.555	0.518	0.464	0.58
TFYGLhQDFPSVVLVGLGK-P28838-H6zsw-TMT	1.129	1.037	1.167	1.378	0.985	0.698	0.785	0.873	1.017	0.865	1.009	1.083	0.94	1.097	1.097	1.017	0.631	0.744	0.765	0.858
EALNScNK-P19338-C6zsw-TMT	0.961	0.0315	0.0315	0.851	1.341	0.0315	0.0315	1.258	1.897	0.0315	0.0315	1.803	1.153	0.0315	0.0315	1.198	1.386	0.0315	0.0315	1.473
NADMSEEMQQDSVEcATQALEK-F8VXL2-C15zsw-TMT	1.253	0.0315	0.0315	1.139	0.928	0.0315	0.0315	0.927	0.984	0.0315	0.0315	0.988	1.159	0.0315	0.0315	0.876	1.225	0.0315	0.0315	1.232
AWSTGDcDNGGDEWEQEIR-Q9BRF8-C7zsw-TMT	1.144	1.161	0.0315	0.946	1.139	1.323	0.0315	1.031	1.157	1.09	0.0315	1.094	0.826	0.683	0.0315	0.826	0.883	0.927	0.0315	1.046
hIADLAGNSEVILPVPAFN-P06733-H1zsw-TMT	0.0315	1.118	0.0315	0.956	0.0315	0.995	0.0315	0.676	0.0315	0.862	0.0315	0.91	0.0315	1.424	0.0315	1.254	0.0315	1.006	0.0315	0.939
STYNhLSSWLTDAR-P61106-H5zsw-TMT	0.974	0.819	0.986	0.0315	0.908	0.856	0.832	0.0315	1.376	0.894	1.202	0.0315	1.018	0.76	1.054	0.0315	1.172	0.875	0.961	0.0315
SLVEASSSGVSVLSLcEK-Q9UQ80-C16zsw-TMT	0.0315	0.0315	1.115	0.877	0.0315	0.0315	0.737	0.767	0.0315	0.0315	0.782	0.757	0.0315	0.0315	0.895	0.834	0.0315	0.0315	0.894	0.822
MGVVEcAK-Q9UQ80-C6zsw-TMT	0.0315	0.0315	1.02	0.956	0.0315	0.0315	0.972	1.047	0.0315	0.0315	0.981	1.009	0.0315	0.0315	1.078	1.083	0.0315	0.0315	0.949	1.19
SGDAAIVDMVPGKPMcVESFSDYPPLGR-P68104-C16zsw-TMT	0.0315	1.145	1.354	0.0315	0.0315	0.745	0.905	0.0315	0.0315	0.799	0.845	0.0315	0.0315	1.136	0.967	0.0315	0.0315	0.918	0.961	0.0315
TANVSVVDLTcR-P04406-C11zsw-TMT	1.447	1.401	1.45	1.496	0.583	0.687	0.586	0.61	0.416	0.548	0.423	0.451	0.387	0.532	0.481	0.507	0.409	0.595	0.461	0.488
hVSPAGAAVGIPLSEDEAK-B2R7P8-H1zsw-TMT	1.224	0.887	1.115	0.994	1.338	1.21	1.294	1.226	1.633	1.466	1.706	1.465	1.027	0.91	1.111	0.911	1.385	1.208	1.355	1.417
NQSFcPTVNLDK-Q9BQQ5-C5zsw-TMT	0.933	0.883	0.875	0.981	0.889	0.98	0.874	1.115	0.87	0.896	1.123	1.157	0.777	1.053	1.161	1.083	0.753	0.997	1.157	0.986
TIAEcLADELINAAK-M0R0F0-C5zsw-TMT	1.276	1.194	1.082	1.183	0.997	1.051	0.934	0.926	0.859	0.792	0.789	0.887	1.096	0.951	1.027	0.964	0.929	1.071	1.023	1.126
EDSQRPGAhLTVK-F8W6I7-H9zsw-TMT	0.933	0.0315	0.838	0.0315	1.382	0.0315	1.127	0.0315	1.463	0.0315	1.465	0.0315	1.32	0.0315	0.945	0.0315	1.251	0.0315	1.374	0.0315
HALAEGLGVIAcIGEK-V9HWK1-C12zsw-TMT	1.118	0.0315	0.98	0.926	0.551	0.0315	0.597	0.634	0.727	0.0315	0.633	0.621	0.935	0.0315	1.006	0.978	0.577	0.0315	0.533	0.564
DELhIVEAEAMNYEGSPIK-A0A0S2Z4G7-H4zsw-TMT	1.108	0.988	0.0315	1.071	1.032	0.948	0.0315	0.907	1.057	1.242	0.0315	1.083	1.07	1.115	0.0315	0.911	0.995	0.963	0.0315	0.919
LSFQhDPETSVLVLR-Q14697-H5zsw-TMT	0.959	1.04	1.084	0.97	1.106	1.348	1.242	1.262	0.932	1.157	1.166	0.947	1.03	1.098	1.116	0.866	0.791	0.937	0.998	0.698
SYIEGYVPSQADVAVFEAVSSPPPADLchALR-P24534-C28zsw-TMT H29zsw-TMT	0.809	0.671	0.0315	0.0315	0.888	0.695	0.0315	0.0315	0.652	0.571	0.0315	0.0315	0.81	0.791	0.0315	0.0315	1.052	0.96	0.0315	0.0315
VLDGLhNELQTIGFQIETIGK-O60701-H6zsw-TMT	0.788	1.017	1.21	0.863	0.716	0.655	0.866	0.647	0.37	0.802	0.86	0.607	0.292	0.716	0.713	0.345	0.35	0.675	0.767	0.445
AITIAGIPQSIIEcVK-Q15366-C14zsw-TMT	1.089	0.947	1.11	1.214	0.814	0.835	0.718	0.687	0.718	0.669	0.71	0.682	0.967	0.985	1.055	0.992	0.695	0.691	0.838	0.703
LLNLDGTcADSYSFVFSR-Q5VY30-C8zsw-TMT	0.0315	0.0315	1.024	1.111	0.0315	0.0315	0.93	1.263	0.0315	0.0315	0.926	1.038	0.0315	0.0315	0.921	1.03	0.0315	0.0315	0.78	0.979
LMNESLMLVTALNPhIGYDK-P07954-H15zsw-TMT	1.095	1.115	1.106	1.102	0.958	0.849	0.808	0.837	0.939	1.049	1.066	1.04	1.03	1.176	0.989	0.865	1.097	1.158	1.073	1.037
YhVPVVVVPEGSASDTHEQAILR-P04844-H2zsw-TMT	0.986	1.071	1.247	1.18	1.382	1.659	1.904	1.677	1.341	1.573	1.741	1.771	1.069	1.255	1.198	1.149	1.254	1.529	1.487	1.377
TYGADLASVDFQhASEDAR-B4E3A8-H13zsw-TMT	0.816	0.882	0.811	0.756	0.954	0.895	0.999	0.776	1.047	1.069	1.102	0.873	0.77	0.865	0.828	0.742	1.129	0.907	0.723	0.652
SAVENcQDSWR-P52209-C6zsw-TMT	1.175	0.0315	1.296	1.149	0.697	0.0315	0.657	0.658	0.632	0.0315	0.611	0.522	0.745	0.0315	0.767	0.802	0.646	0.0315	0.808	0.575
VVDLMAhMAS-P04406-H7zsw-TMT	0.911	1.121	0.0315	0.987	0.771	0.887	0.0315	0.721	0.846	0.89	0.0315	0.784	1.014	0.958	0.0315	0.89	0.92	0.841	0.0315	0.794
LLGTMAGGAADcSFWER-H0YJM8-C12zsw-TMT	0.0315	0.0315	0.964	1.343	0.0315	0.0315	0.77	0.963	0.0315	0.0315	0.854	0.94	0.0315	0.0315	0.97	1.029	0.0315	0.0315	0.782	1.028
LWNTLGVcK-P63244-C8zsw-TMT	1.068	1.031	1.154	1.029	0.847	0.841	0.827	0.76	0.874	0.853	0.83	0.801	1.213	1.082	1.145	1.142	0.821	0.793	0.833	0.851
TVIGDhGDELFSVFGAPFL-P23141-H6zsw-TMT	0.656	0.838	0.768	0.685	0.795	0.576	0.361	0.638	0.894	1.013	0.59	0.665	0.725	0.589	0.311	0.52	0.9	0.539	0.455	0.559
VLGFSEPTVVTAALNcVGK-B4DM28-C16zsw-TMT	1.115	0.0315	1.404	0.0315	1.153	0.0315	1.059	0.0315	0.911	0.0315	0.894	0.0315	1.002	0.0315	0.813	0.0315	0.952	0.0315	0.833	0.0315
SFLTAEDcFELGK-P13674-C8zsw-TMT	0.0315	0.945	1.295	1.456	0.0315	0.787	0.871	1.08	0.0315	0.899	1.009	1.157	0.0315	0.979	1.108	1.221	0.0315	1.012	1.143	1.427
DIAAhIK-F8VXL2-H5zsw-TMT	0.936	0.0315	0.0315	0.879	1.146	0.0315	0.0315	1.131	1.367	0.0315	0.0315	1.386	0.98	0.0315	0.0315	1.048	1.188	0.0315	0.0315	1.365
LRPLSYPDTDVILMcF-P61586-C15zsw-TMT	1.546	1.296	0.0315	0.0315	0.981	0.691	0.0315	0.0315	0.749	0.626	0.0315	0.0315	1.006	0.91	0.0315	0.0315	1.014	1.195	0.0315	0.0315
SLEYcSTASIDSENPPDLNK-P78527-C5zsw-TMT	1.408	0.0315	0.0315	1.166	0.596	0.0315	0.0315	0.589	0.51	0.0315	0.0315	0.601	0.744	0.0315	0.0315	0.71	0.818	0.0315	0.0315	0.79
FATDGEGYKPcDPQVIR-D6W5C0-C11zsw-TMT	0.934	1.311	1.058	1.001	1.346	1.507	1.2	1.58	1.474	1.27	1.306	1.383	0.937	0.98	1.05	0.975	1.174	1.156	1.088	1.137
DhIMEIFSTYGK-H3BV80-H2zsw-TMT	1.053	1.05	1.059	0.95	0.871	1.138	0.915	0.885	1.092	1.143	1.205	0.975	1.098	1.165	1.169	0.96	0.715	0.871	0.88	0.652
McQGGDFTR-A8K486-C2zsw-TMT	0.947	0.905	0.0315	1.021	0.934	0.94	0.0315	1.119	0.57	0.911	0.0315	0.734	0.593	0.985	0.0315	1.161	0.617	0.858	0.0315	1.08
IhVLPIDDTVEGITGNLFEVY-P55072-H2zsw-TMT	0.717	1.177	1.04	0.824	1.814	1.867	0.976	1.192	0.887	1.138	1.324	0.824	0.661	0.939	0.96	0.829	1.245	1.662	0.724	0.948
TIVITShPGQIVK-P31689-H7zsw-TMT	0.9	1.013	0.922	0.0315	1.108	1.203	1.063	0.0315	1.448	1.312	1.183	0.0315	0.976	0.956	0.942	0.0315	0.97	1.101	1.048	0.0315
hPhDIIDDINSGAVEcPAS-P30050-H1zsw-TMT H3zsw-TMT C16zsw-TMT	0.967	0.945	1.798	0.793	0.799	0.869	0.0315	0.749	0.994	1.091	0.0315	1.026	1.473	1.62	0.0315	1.279	0.995	0.894	0.0315	0.796
QLIYNYPEQLFGAAGVMAIEhADFAGVER-P78371-H21zsw-TMT	0.929	0.641	0.862	0.649	1.026	0.852	1.189	0.847	0.664	0.642	0.664	0.503	0.951	1.238	1.255	0.627	0.98	0.992	1.006	0.951
SNFAEALAAhK-P07237-H10zsw-TMT	0.942	0.944	0.968	0.874	1.092	1.084	1.083	1.147	1.204	1.328	1.232	1.202	0.976	1.053	0.941	0.926	0.897	0.913	0.951	0.886
cLELFTELAEDKENYK-P07900-C1zsw-TMT	1.095	0.944	0.999	0.838	0.939	0.79	0.951	0.781	1.069	0.892	0.937	0.957	1.299	1.089	1.04	0.961	1.058	0.954	0.927	0.887
FSGDLDDQTcR-B5BUB5-C10zsw-TMT	1.016	0.875	0.954	0.0315	0.999	1.055	0.991	0.0315	0.964	0.934	0.897	0.0315	0.937	0.65	0.682	0.0315	0.935	0.768	0.815	0.0315
STAGDThLGGEDFDNR-P11142-H7zsw-TMT	0.756	0.925	0.726	0.759	1.218	1.581	1.294	1.519	1.334	1.547	1.309	1.458	1.459	1.71	1.443	1.742	1.829	2.744	1.951	2.025
IYGADDIELLPEAQhK-A0A024R652-H15zsw-TMT	1.074	0.98	0.0315	1.032	1.437	1.156	0.0315	1.297	1.476	1.592	0.0315	1.64	1.189	1.344	0.0315	1.352	1.283	1.469	0.0315	1.605
NAIDDGcVVPGAGAVEVAMAEALIK-B4DPJ8-C7zsw-TMT	1.107	0.837	1.081	1.014	0.941	1.085	1.067	1.017	0.583	0.782	0.767	0.579	1.047	0.948	0.984	1.015	1.098	1.081	1.182	1.086
hVGNQQYNVTYVVK-O75369-H1zsw-TMT	0.782	0.731	0.0315	0.704	0.8	1.016	0.0315	0.87	1.467	1.156	0.0315	1.48	0.974	0.789	0.0315	0.812	1.059	0.864	0.0315	1.029
AKPYEGSILEADcDILIPAASEK-B4DMF5-C13zsw-TMT	1.07	1.074	1.134	1.098	1.036	1.306	0.989	1.118	1.27	1.413	1.219	1.217	0.952	0.998	0.961	0.946	0.939	1.035	0.944	0.977
KPLPDhVSIVEPK-P23396-H6zsw-TMT	1.047	1.183	0.0315	0.0315	1.196	1.298	0.0315	0.0315	1.197	1.138	0.0315	0.0315	1.389	1.736	0.0315	0.0315	1.513	1.799	0.0315	0.0315
NALANPLYcPDYR-H3BRG4-C9zsw-TMT	1.029	0.0315	1.186	0.0315	0.7	0.0315	0.893	0.0315	1.182	0.0315	1.22	0.0315	0.915	0.0315	1.048	0.0315	0.889	0.0315	0.96	0.0315
ALQDEWDAVMLhSF-Q9UMS4-H12zsw-TMT	1.056	0.999	1.126	0.0315	1.383	1.377	1.387	0.0315	1.088	1.107	1.102	0.0315	0.95	1.072	0.968	0.0315	1.095	1.273	1.079	0.0315
IISNAScTTN-P04406-C7zsw-TMT	1.083	0.746	1.315	1.166	0.948	0.611	1.052	0.758	1.059	0.407	1.194	0.884	1.252	0.457	1.364	1.064	1.528	1.063	1.84	1.526
LYAVhQEGNK-P50990-H5zsw-TMT	0.861	0.797	0.73	0.931	1.369	1.124	1.535	1.272	1.193	1.092	1.064	1.14	1.299	1.039	1.426	1.14	1.101	1.02	1.236	1.163
YESGDhVAVYPANDSALVNQLGK-P16435-H6zsw-TMT	1.058	0.901	0.648	1.195	1.27	0.921	1.048	1.048	1.325	1.162	1.083	1.64	0.968	1.074	0.918	1.013	1.149	1.272	0.833	1.38
hGVIVAADSR-H0YJM8-H1zsw-TMT	0.848	0.0315	0.868	0.933	1.093	0.0315	1.082	1.1	0.838	0.0315	0.913	0.972	0.755	0.0315	0.919	1.029	0.928	0.0315	1.124	1.176
TGGAYGEDLGADYNLSQVcDGK-A0A0U1RQF0-C19zsw-TMT	1.297	0.998	1.145	1.274	0.788	0.761	0.619	0.811	0.947	0.972	0.625	0.89	1.202	1.191	1.36	1.324	1.099	0.984	1.022	1.07
GAPPSSNIEDFhGLLPK-P43243-H12zsw-TMT	0.816	0.0315	1.011	0.0315	0.817	0.0315	0.708	0.0315	1.016	0.0315	1.079	0.0315	0.797	0.0315	0.876	0.0315	0.747	0.0315	0.72	0.0315
AYhEQLTVAEITN-Q53GA7-H3zsw-TMT	0.0315	0.931	0.0315	0.819	0.0315	1.009	0.0315	1.202	0.0315	1.07	0.0315	1.144	0.0315	1.063	0.0315	1.181	0.0315	1.108	0.0315	1.143
DhADSNIVIMLVGNK-H3BMH2-H2zsw-TMT	0.926	0.975	0.923	1.046	0.847	0.893	1.034	0.944	1.054	1.076	1.075	1.107	0.869	1.003	1.004	1.087	0.822	0.76	0.935	0.877
NTGIIcTIGPASR-P14618-C6zsw-TMT	1.391	1.012	1.305	1.366	0.617	0.538	0.566	0.588	0.562	0.447	0.537	0.641	0.802	0.726	0.816	0.753	0.887	0.96	0.849	1.615
IEGDMIVcAAYAHELPK-B3KTM6-C8zsw-TMT	1.139	0.0315	0.0315	1.085	0.924	0.0315	0.0315	0.821	1.825	0.0315	0.0315	1.986	0.851	0.0315	0.0315	0.911	0.921	0.0315	0.0315	0.878
FEELcSDLFR-A0A1U9X7W4-C5zsw-TMT	1.05	1.076	1.067	1.106	0.562	0.712	0.636	0.605	0.67	0.764	0.652	0.59	0.893	1.037	0.961	1.035	1.141	0.976	0.88	1.092
LTLYDIAhTPGVAADLShIETK-Q75MT9-H8zsw-TMT H18zsw-TMT	0.768	0.773	0.952	0.0315	0.978	0.967	0.976	0.0315	0.796	0.889	1.066	0.0315	0.732	0.813	0.644	0.0315	0.63	0.648	0.598	0.0315
SPDGhLFQVEYAQEAVK-Q05DH1-H5zsw-TMT	0.869	0.935	0.816	0.764	1.234	1.128	1.109	1.28	1.216	1.206	1.096	1.139	1.134	1.1	1.123	0.993	1.149	1.191	1.086	1.039
hGIVEDWDLMER-B4DXW1-H1zsw-TMT	1.021	0.598	0.853	0.868	1.006	0.929	0.782	0.965	1.043	0.69	0.756	0.884	1.105	0.785	0.938	1.031	0.968	0.701	0.756	0.759
GNFGGSFAGSFGGAGGhAPGVAR-P52272-H17zsw-TMT	0.0315	0.933	0.662	0.0315	0.0315	1.345	1.168	0.0315	0.0315	1.591	1.131	0.0315	0.0315	1.017	0.539	0.0315	0.0315	1.102	1.08	0.0315
TDRPLPENPYhSR-P51970-H11zsw-TMT	0.0315	0.0315	0.851	0.873	0.0315	0.0315	1.181	1.218	0.0315	0.0315	1.867	1.726	0.0315	0.0315	1.088	1.04	0.0315	0.0315	1.277	1.45
WNTDNTLGTEIAIEDQIcQGLK-A0A0A0MR02-C18zsw-TMT	0.0315	1.103	0.0315	1	0.0315	0.658	0.0315	1.022	0.0315	0.655	0.0315	0.842	0.0315	0.863	0.0315	0.996	0.0315	1.532	0.0315	1.288
ITAFVPNDGcLNFIEENDEVLVAGFGR-D6RD47-C10zsw-TMT	0.742	0.0315	1.287	0.0315	0.813	0.0315	1.359	0.0315	0.642	0.0315	0.55	0.0315	0.659	0.0315	0.815	0.0315	0.876	0.0315	0.886	0.0315
NNEDISIIPPLFTVSVDhR-P51571-H18zsw-TMT	0.889	0.904	0.981	0.992	1.003	1.042	1.061	1.006	0.968	0.935	1.022	1.043	1.044	1.184	0.984	1.033	0.834	0.887	0.858	0.999
EIcNAYTELNDPMR-Q15046-C3zsw-TMT	1.103	0.968	1.167	0.0315	1.125	1.017	0.987	0.0315	1.24	1.057	1.469	0.0315	1.078	1.125	1.128	0.0315	0.95	0.969	1.033	0.0315
LhLSGIDANPNALFPPVEFPAPR-A0A0U1RQF0-H2zsw-TMT	1.041	1.359	0.864	1.069	0.819	1.053	0.739	0.843	1.195	1.156	0.993	1.093	0.956	1.155	0.98	0.8	0.86	0.825	0.744	0.819
hALIIYDDLSK-P25705-H1zsw-TMT	1.118	0.856	0.738	1.121	1.242	0.914	1.03	1.014	1.734	1.066	1.377	1.47	1.33	1.007	1.096	1.128	1.551	0.902	1.142	1.104
SLELhEEFGYNADTQK-Q8N8M9-H5zsw-TMT	0.0315	0.593	0.735	0.0315	0.0315	1.072	1.001	0.0315	0.0315	0.957	0.961	0.0315	0.0315	0.798	1.083	0.0315	0.0315	0.619	1	0.0315
WLhNEDQMAVEK-P37837-H3zsw-TMT	0.678	0.902	0.837	0.783	0.857	1.066	0.848	0.909	0.65	0.714	0.695	0.724	0.644	0.639	0.566	0.659	0.907	1.208	1.04	1.131
QVLGQMVIDEELLGDGhSYSPR-P28070-H17zsw-TMT	0.902	0.0315	0.838	0.0315	0.926	0.0315	0.88	0.0315	0.906	0.0315	0.829	0.0315	1.218	0.0315	0.97	0.0315	1.122	0.0315	1.046	0.0315
EYFSWEGAFQhVGK-P26641-H11zsw-TMT	0.0315	0.951	0.987	0.997	0.0315	0.943	0.939	0.798	0.0315	0.87	0.628	0.672	0.0315	1.118	0.872	0.903	0.0315	1.11	1.173	1.062
LVVPATQcGSLIGK-Q15365-C8zsw-TMT	1.06	1.078	0.955	0.876	1.03	0.89	0.918	0.869	1.079	0.806	0.946	0.859	1.044	0.964	0.989	0.981	0.966	0.765	1.017	0.954
IVLDNSVFSEhR-Q00610-H11zsw-TMT	0.972	0.929	0.662	0.0315	1.171	1.06	1.181	0.0315	1.178	1.2	0.876	0.0315	0.791	0.866	0.843	0.0315	0.845	0.878	0.815	0.0315
EEPFFPPPEEFVFIhAVPVEER-H3BQZ7-H15zsw-TMT	1.067	1.012	0.922	0.95	1.161	1.5	1.323	1.443	0.974	0.858	0.874	1.041	0.967	0.914	0.763	0.681	1.003	0.973	1.021	0.952
VQVQDNEGcPVEALVK-Q5HY54-C9zsw-TMT	1.024	0.958	0.994	0.895	0.86	0.952	0.881	0.901	0.933	1.017	1.075	1.242	0.932	1.066	1.088	1.358	1.015	1.133	1.157	1.243
TTGIVMDSGDGVThTVPIYEGYALPh-Q8WVW5-H14zsw-TMT H26zsw-TMT	0.0315	0.0315	1.074	0.863	0.0315	0.0315	1.536	1.232	0.0315	0.0315	1.289	1.102	0.0315	0.0315	1.364	1.182	0.0315	0.0315	1.273	1.045
MIVDPVEPhGEMK-B2R8R5-H9zsw-TMT	0.919	0.89	0.873	1.041	1.395	1.352	1.131	0.772	1.203	1.253	1.16	0.404	1.067	1.057	0.989	0.269	1.061	1.021	1.031	0.14
PWSQHYhQGYY-Q00839-H7zsw-TMT	0.603	0.857	0.0315	0.63	1.373	1.446	0.0315	1.459	1.305	1.139	0.0315	1.332	1.141	1.227	0.0315	1.162	0.747	0.822	0.0315	1.017
GPLLVQDVVFTDEMAhFDR-P04040-H16zsw-TMT	0.0315	0.0315	1.187	1.353	0.0315	0.0315	0.98	1.053	0.0315	0.0315	1.809	1.59	0.0315	0.0315	1.183	1.198	0.0315	0.0315	1.63	1.588
LMDLDVEQLGIPEQEYScVVK-P12004-C18zsw-TMT	0.972	0.831	1.08	1.003	0.862	1.141	1.18	0.964	0.738	0.907	0.564	0.781	1.165	1.176	1.068	0.848	1.09	1.004	0.968	0.999
IGAFGYMEcSAK-P61586-C9zsw-TMT	1.162	1.349	1.222	1.303	0.685	0.775	0.846	0.798	0.487	0.752	0.897	0.791	0.715	0.864	0.884	0.875	0.659	0.843	0.891	0.841
ThTQDAVPLTLGQEFSGYVQQVK-P07954-H2zsw-TMT	0.898	0.883	1.054	1.158	1.16	1.207	1.138	1.038	1.289	1.226	1.089	1.205	1.181	1.21	1.075	1.092	1.133	1.169	1.026	1.094
VLSAPPhFHFGQTNR-P26641-H7zsw-TMT	0.822	1.007	0.89	0.0315	1.027	1.116	0.967	0.0315	0.87	0.902	1.009	0.0315	0.94	1.01	1.083	0.0315	1.008	1.142	1.105	0.0315
GSITSVQAIYVPADDLTDPAPATTFAhLDATTVLSR-P06576-H27zsw-TMT	0.0315	0.0315	0.546	0.877	0.0315	0.0315	0.759	1.087	0.0315	0.0315	0.849	1.246	0.0315	0.0315	0.653	0.968	0.0315	0.0315	0.67	0.937
ALDVmVSTFhK-P26447-M5Oxidation H10zsw-TMT	0.0315	1.224	0.947	0.925	0.0315	0.868	0.792	0.803	0.0315	0.861	0.913	0.856	0.0315	0.812	0.747	0.745	0.0315	0.774	0.859	0.738
LcSLFYTNEEVAK-P43243-C2zsw-TMT	0.0315	0.0315	0.788	0.951	0.0315	0.0315	0.973	0.88	0.0315	0.0315	0.831	1.095	0.0315	0.0315	0.89	1.104	0.0315	0.0315	0.87	0.924
hVVQSISTQQEK-A8K4W2-H1zsw-TMT	0.999	0.973	0.879	0.831	1.937	1.835	2.075	1.911	1.982	2.032	2.034	1.955	0.889	0.875	0.896	0.988	1.116	1.21	1.553	1.277
IThNPFGPGQFFDLSIR-M0QZ93-H3zsw-TMT	1.115	0.756	0.98	1.052	0.652	0.524	0.591	0.681	0.879	0.666	0.665	0.79	1.023	0.735	0.69	0.837	0.706	0.577	0.601	0.64
SNIWVAGDAAcFYDIK-O95831-C11zsw-TMT	0.881	1.028	0.0315	0.0315	0.897	0.899	0.0315	0.0315	0.745	0.702	0.0315	0.0315	0.805	0.949	0.0315	0.0315	0.645	0.536	0.0315	0.0315
ALAPTWEQLALGLEhSETVK-Q86UY0-H15zsw-TMT	1.043	1.286	1.017	1.191	0.972	1.002	0.855	1.016	1.116	1.548	1.182	1.304	1.142	1.337	1.005	0.961	1.19	1.158	0.922	1.132
LYFhIGETEK-B2R8A2-H4zsw-TMT	0.887	1.023	0.0315	0.817	1.048	1.107	0.0315	1.051	1.236	1.049	0.0315	1.221	0.902	0.777	0.0315	1.042	1.023	1.036	0.0315	0.94
VcTLAIIDPGDSDIIR-P62888-C2zsw-TMT	1.12	0.0315	1.104	0.0315	0.912	0.0315	0.808	0.0315	0.904	0.0315	0.994	0.0315	0.966	0.0315	0.965	0.0315	0.778	0.0315	0.81	0.0315
TGYAFVDcPDESWALK-O00425-C8zsw-TMT	0.0315	1.039	1.016	1.008	0.0315	1.3	1.181	1.156	0.0315	1.186	1.252	1.231	0.0315	1.038	0.9	1.002	0.0315	1.036	0.965	1.111
NALANPLYcPDYR-P22695-C9zsw-TMT	0.0315	1.041	0.0315	0.957	0.0315	0.868	0.0315	0.72	0.0315	1.088	0.0315	0.996	0.0315	0.989	0.0315	0.915	0.0315	0.886	0.0315	0.868
hWPFMVVNDAGR-P11142-H1zsw-TMT	1.018	0.853	0.854	1.054	0.892	0.787	0.794	0.791	1.025	0.879	0.937	0.884	1.088	1.023	0.962	0.988	0.813	0.771	0.85	0.86
SYFSQYGEVVDcVIMK-K7EQ02-C12zsw-TMT	0.879	1.086	1.11	1.114	1.078	1.026	1.077	0.968	0.91	1.015	0.967	0.966	0.925	1.023	1.003	0.862	0.644	0.833	0.72	0.774
FhNWFDDR-A0A024R3J7-H2zsw-TMT	0.0315	1.097	0.76	0.929	0.0315	1.236	0.911	1.159	0.0315	1.001	0.904	0.981	0.0315	1.018	1.089	1.034	0.0315	1.034	0.737	1.042
ShFEQWGTLTDcVVMR-F8W6I7-H2zsw-TMT C12zsw-TMT	0.0315	0.888	0.717	0.887	0.0315	0.812	0.862	0.88	0.0315	1.403	1.67	1.435	0.0315	1.292	1.193	1.083	0.0315	0.766	0.927	0.668
FQSShHPTDITSLDQYVER-Q5CAQ5-H5zsw-TMT	0.838	0.897	0.829	0.886	1.425	1.572	1.448	1.604	1.557	1.491	1.778	1.768	1.405	1.109	1.17	1.293	1.171	1.106	1.173	1.365
ETIEDVEEMLNNLPGVTSVhSR-B4DJ66-H20zsw-TMT	0.998	0.0315	0.889	0.0315	0.789	0.0315	0.807	0.0315	0.883	0.0315	0.814	0.0315	1.015	0.0315	0.844	0.0315	0.782	0.0315	1.062	0.0315
AEIScTDNQDGTcSVSYLPVLPGDYSILVK-Q5HY54-C5zsw-TMT C13zsw-TMT	0.0315	1.127	0.0315	0.606	0.0315	0.581	0.0315	0.634	0.0315	0.501	0.0315	0.582	0.0315	0.712	0.0315	0.67	0.0315	0.753	0.0315	0.87
TDEFQLhTNVNDGTEFGGSIYQK-P21796-H7zsw-TMT	0.889	0.77	0.0315	1.073	0.946	1.151	0.0315	1.171	1.603	1.6	0.0315	1.853	0.91	0.855	0.0315	1.163	1.001	1.03	0.0315	1.605
SSGEIVYcGQVFEK-M0R3D6-C8zsw-TMT	1.155	1.259	0.0315	0.0315	0.77	0.805	0.0315	0.0315	0.928	0.845	0.0315	0.0315	1.184	1.047	0.0315	0.0315	1.336	0.649	0.0315	0.0315
AEGSDVANAVLDGADcImLSGETAK-P14618-C16zsw-TMT M18Oxidation	1.301	1.145	0.0315	1.435	0.642	0.669	0.0315	0.81	0.724	0.642	0.0315	0.957	1.025	0.86	0.0315	0.927	1.371	1.308	0.0315	1.223
LVIWGTDVNVAAcK-B4DLA6-C13zsw-TMT	0.898	0.0315	1.083	0.0315	0.877	0.0315	0.816	0.0315	0.593	0.0315	0.897	0.0315	0.99	0.0315	1.059	0.0315	0.701	0.0315	0.717	0.0315
MYGISLcQAILDETK-P04083-C7zsw-TMT	1.019	0.955	0.0315	1.048	0.595	0.627	0.0315	0.562	0.503	0.658	0.0315	0.67	0.588	0.758	0.0315	0.702	0.95	0.729	0.0315	0.698
QAAPcVLFFDELDSIAK-P55072-C5zsw-TMT	1.079	1.084	1.146	1.069	1.082	1.234	0.935	1.027	0.736	0.681	0.768	0.659	1.101	1.1	0.879	0.978	1.083	1.047	1.252	0.925
hEILLSK-Q9NRJ5-H1zsw-TMT	0.677	0.745	0.835	0.95	0.665	0.903	1.321	1.395	0.72	0.67	1.725	1.71	0.652	0.644	0.909	1.126	0.569	0.565	1.073	1.063
SIEIPRPVDGVEVPGcGK-B5BU25-C16zsw-TMT	0.0315	0.0315	0.598	1.019	0.0315	0.0315	0.452	1.161	0.0315	0.0315	0.0315	1.208	0.0315	0.0315	0.0315	1.137	0.0315	0.0315	0.0315	0.99
GVGTDEAcLIEILASR-B4DPJ2-C8zsw-TMT	1.145	0.0315	1.026	1.088	0.995	0.0315	0.828	0.973	0.95	0.0315	0.802	1.13	1.098	0.0315	0.892	1.038	1.109	0.0315	1.139	1.082
GTDImYTGTLDcWR-P05141-M5Oxidation C12zsw-TMT	1.048	0.994	0.0315	0.805	0.8	0.696	0.0315	0.791	0.987	0.874	0.0315	0.655	1.068	1.018	0.0315	0.827	1.04	0.886	0.0315	0.564
ILDILGETcK-A0PJ47-C9zsw-TMT	0.0315	0.892	0.0315	1.011	0.0315	0.489	0.0315	1.033	0.0315	0.173	0.0315	1.009	0.0315	0.19	0.0315	1.114	0.0315	0.0315	0.0315	1.077
KYPYWPhQPIENL-O75947-H7zsw-TMT	0.844	0.968	0.924	0.888	1.214	1.2	0.972	1.069	1.395	1.523	1.473	1.647	0.821	0.873	0.972	0.911	0.859	0.805	1.016	0.874
hLVYESDK-Q15293-H1zsw-TMT	0.0315	0.874	0.849	0.0315	0.0315	1.642	2.003	0.0315	0.0315	1.391	1.627	0.0315	0.0315	1.333	1.326	0.0315	0.0315	1.308	1.365	0.0315
REhFEKWGTLTDCVVMR-B4E3E6-H3zsw-TMT	0.0315	0.98	0.0315	1.023	0.0315	0.808	0.0315	0.801	0.0315	1.044	0.0315	0.963	0.0315	1.154	0.0315	1.013	0.0315	0.767	0.0315	0.748
GQGVYLGMPGcLPVYDALAGEFIR-P30040-C11zsw-TMT	0.901	0.926	0.967	1.123	1.643	1.368	1.642	1.935	0.947	1.211	1.018	1.145	0.826	0.984	0.801	0.611	1.188	1.088	1.01	1.035
LPVVIGGLLDVDcSEDVIK-Q00610-C13zsw-TMT	1.304	1.327	1.346	1.777	1.193	1.155	1.001	1.161	0.878	1.004	0.816	0.876	1.22	1.238	0.857	0.97	1.108	1.168	1.04	1.098
ALSVGNIDDALQcYSEAIK-A8K690-C13zsw-TMT	1.223	0.938	0.906	0.908	1.055	1.087	0.726	0.848	0.799	0.78	0.602	0.74	0.865	0.896	0.674	0.767	0.995	1.076	0.875	0.792
DGSDYEGWcWPGSAGYPDFTNPTMR-Q14697-C9zsw-TMT	1.275	1.225	1.298	0.844	1.78	2.003	1.695	1.416	0.856	0.832	0.747	0.806	0.863	0.887	0.914	0.844	1.272	1.255	1.241	0.984
SLEDPQThSNR-P08238-H8zsw-TMT	0.0315	0.799	0.0315	1.062	0.0315	1.072	0.0315	1.152	0.0315	1.104	0.0315	1.154	0.0315	1.054	0.0315	1.253	0.0315	0.863	0.0315	1.052
hAYDLR-H0Y786-H1zsw-TMT	0.975	0.0315	0.866	0.958	1.169	0.0315	1.233	1.269	0.954	0.0315	1.013	1.033	1.1	0.0315	1.17	1.269	0.901	0.0315	0.943	0.94
PGHLQEGFGcVVTNR-Q5VU21-C10zsw-TMT	0.72	0.98	1.057	1.012	1.253	1.154	1.187	1.233	1.094	0.945	1.005	0.987	1.064	1.142	1.2	1.215	0.973	1.184	1.281	1.311
HGLEVIYmIEPIDEYcVQQLK-P07900-M8Oxidation C16zsw-TMT	1.01	1.136	1.031	1.121	1.048	0.969	0.841	0.796	0.905	0.988	0.923	0.864	1.121	1.245	1.119	1.099	0.975	1.11	0.888	0.97
GILLhLESELAQTR-B2RA03-H5zsw-TMT	0.962	0.918	0.957	0.0315	0.915	0.798	0.845	0.0315	0.964	0.884	0.913	0.0315	1.107	1.092	1.093	0.0315	0.866	0.809	0.914	0.0315
hSQFIGYPITLF-P07900-H1zsw-TMT	1.195	1.245	1.062	1.203	0.966	0.869	0.867	0.921	0.997	0.781	0.962	0.979	1.44	1.155	1.223	1.114	0.978	0.964	1.071	1.126
GFcFITFK-H0Y8G5-C3zsw-TMT	0.0315	1.078	0.0315	1.051	0.0315	1.036	0.0315	1.035	0.0315	0.958	0.0315	0.959	0.0315	1.079	0.0315	1.045	0.0315	0.895	0.0315	1.026
hQPTAIIAK-B4E022-H1zsw-TMT	1.057	0.974	0.798	0.879	0.922	0.799	0.779	0.979	1.046	0.856	0.797	0.997	0.815	0.675	0.721	0.909	0.905	0.737	0.854	0.894
VDVEcPDVNIEGPEGK-Q09666-C5zsw-TMT	0.846	0.965	0.911	0.775	0.828	0.825	0.837	0.806	0.869	0.848	0.909	0.74	0.859	0.916	0.835	0.669	1.035	1.097	1.074	1.065
SVLDAAQIVGLNcLR-B4DF68-C13zsw-TMT	1.118	0.99	0.94	0.0315	0.88	0.819	0.741	0.0315	0.956	0.938	0.882	0.0315	1.535	1.466	1.205	0.0315	0.809	0.933	0.806	0.0315
IQPGSQQADFLDALIVSMDVIQhETIGK-P13010-H23zsw-TMT	0.0315	0.0315	0.0315	0.0315	0.0315	2.211	3.634	1.676	0.0315	1.262	1.55	0.731	0.0315	0.773	1.783	0.0315	0.0315	1.853	0.0315	1.251
LVNhFVEEFK-A0A1U9X7W4-H4zsw-TMT	0.689	0.889	0.847	0.673	1.015	0.853	0.893	0.857	1.153	0.983	0.95	1.039	1.098	1.249	0.997	1.248	1.042	1.235	0.923	1.082
GAGTGGLGLTVEGPcEAK-O75369-C15zsw-TMT	0.804	0.908	0.908	0.817	0.818	0.941	0.941	0.902	0.889	1.121	1.103	0.922	0.719	0.776	0.868	0.615	0.793	1.007	0.958	0.837
EDKLEcSEELGDLVK-Q00610-C6zsw-TMT	0.0315	1.113	1.157	0.969	0.0315	0.989	1.16	1.033	0.0315	0.794	1.028	1.012	0.0315	1.473	1.069	1.024	0.0315	0.74	0.931	0.921
DALSDLALhFLNK-B7Z9L0-H9zsw-TMT	1.11	1.097	0.994	1.109	0.813	0.786	0.714	0.832	0.584	0.699	0.581	0.592	1.78	1.501	1.305	1.32	0.888	1.047	0.928	0.84
LQLQEQLQAETELcAEAEELR-P35579-C14zsw-TMT	1.184	1.19	1.154	1.1	0.538	0.679	0.381	0.399	0.503	0.855	0.518	0.531	1.07	1.098	0.779	0.992	0.901	0.935	0.766	0.776
AVDIPhMDIEALK-P62906-H6zsw-TMT	0.889	0.0315	1.082	0.91	0.983	0.0315	0.957	0.92	0.882	0.0315	0.885	0.986	0.776	0.0315	1.121	0.977	0.892	0.0315	0.944	0.906
DDQVTVIGAGVTLhEALAAAELLK-B4E022-H14zsw-TMT	0.0315	1.069	0.5	0.707	0.0315	1.013	0.792	0.889	0.0315	0.624	0.713	0.735	0.0315	0.919	0.858	0.742	0.0315	0.965	1.165	1.083
GSLLGcSIDITSAADSEAITFQK-B2RCM3-C6zsw-TMT	1.101	1.282	1.265	0.989	0.823	0.919	1.009	0.745	0.81	0.75	0.861	0.616	0.933	1.063	0.799	0.747	1.021	1.022	0.846	0.928
GITNLcVIGGDGSLTGANIFR-Q01813-C6zsw-TMT	0.0315	0.0315	1.137	1.293	0.0315	0.0315	0.692	0.655	0.0315	0.0315	0.659	0.756	0.0315	0.0315	0.956	0.956	0.0315	0.0315	0.839	0.931
DSLVDIIGIcK-P27694-C10zsw-TMT	1.002	1.185	0.0315	0.0315	0.952	1.108	0.0315	0.0315	0.622	0.775	0.0315	0.0315	0.947	1.149	0.0315	0.0315	0.884	0.921	0.0315	0.0315
DVIIADcGK-V9HWC6-C7zsw-TMT	1.157	1.129	0.552	1.007	1.313	1.331	0.665	1.197	1.151	1.249	1.098	1.056	1.195	1.333	1.269	1.074	1.173	1.259	1.248	1.175
VThAVVTVPAYFNDAQR-P11021-H3zsw-TMT	0.705	1.009	0.979	1.553	0.938	1.007	1.117	1.159	0.778	1.07	1.273	1.698	0.802	0.858	1.224	1.277	0.839	1.08	1.186	1.365
SYDVPPPPMEPDhPFYSNISK-P18669-H13zsw-TMT	1.282	0.943	0.768	0.857	1.186	1.086	1.026	1.173	1.284	1.476	1.201	1.377	1.481	1.334	1.233	1.348	1.474	2.15	1.306	1.592
GVEIEGPLSTETNWDIAhMISGFE-P28070-H18zsw-TMT	0.652	0.574	0.901	0.732	1.276	1.348	1.534	1.361	0.632	0.963	0.646	0.819	0.585	1.019	0.767	0.548	1.334	1.724	1.754	1.562
SLVEASSSGVSVLSLcEK-A8K6Y1-C16zsw-TMT	1.09	1.012	0.0315	0.0315	0.724	0.747	0.0315	0.0315	0.959	0.801	0.0315	0.0315	1.181	0.981	0.0315	0.0315	0.941	0.848	0.0315	0.0315
ESTLhLVLR-F5H265-H5zsw-TMT	0.881	0.797	0.474	0.593	1.027	0.903	0.91	0.487	0.799	0.902	1.001	0.351	0.854	0.851	1.057	0.346	0.815	1.203	1.787	0.918
VNNVVWDLDrPLEEDCTLELLK-Q5M7Z9-R10zsw-TMT	0.0315	0.695	0.0315	1	0.0315	0.663	0.0315	0.842	0.0315	0.795	0.0315	0.903	0.0315	1.504	0.0315	1.302	0.0315	1.044	0.0315	1.435
HISQISVAEDDDESLLGhLMIVGK-P49773-H18zsw-TMT	0.0315	0.965	0.989	1.074	0.0315	0.743	0.784	0.916	0.0315	0.649	0.781	0.9	0.0315	1.195	1.039	1.036	0.0315	0.897	0.91	0.902
KhLEINPDhPIVETLR-P08238-H2zsw-TMT H9zsw-TMT	0.905	0.849	0.0315	0.0315	1.039	1.1	0.0315	0.0315	1.652	1.986	0.0315	0.0315	1.322	1.258	0.0315	0.0315	0.833	0.865	0.0315	0.0315
VNIVFNYDMPEDSDTYLhR-O00148-H18zsw-TMT	0.862	1.093	0.969	0.883	1.274	1.337	1.141	1.451	0.883	0.965	0.94	0.864	1.023	1.208	1.02	1.086	0.888	1.124	0.878	0.941
FSFSGNTLVSSSADPEGhFETPIWIER-Q14697-H18zsw-TMT	0.0315	0.79	0.887	0.925	0.0315	1.131	1.04	1.097	0.0315	1.005	0.668	0.954	0.0315	0.82	0.539	0.737	0.0315	0.943	0.549	0.773
EGNDLYhEMIESGVINLK-P06576-H7zsw-TMT	1.035	0.0315	0.617	1.257	0.994	0.0315	1.093	1.185	1.115	0.0315	0.68	1.194	1.017	0.0315	0.47	1.19	0.898	0.0315	1.164	1.071
YhTSQSGDEMTSLSEY-P08238-H2zsw-TMT	1.196	1.302	0.0315	0.0315	1.472	1.254	0.0315	0.0315	1.556	1.627	0.0315	0.0315	1.235	1.351	0.0315	0.0315	1.577	1.643	0.0315	0.0315
DLVILLYETALLSSGFSLEDPQThANR-P07900-H24zsw-TMT	1.779	1.68	0.0315	0.0315	1.518	1.577	0.0315	0.0315	1.816	2.586	0.0315	0.0315	1.157	1.063	0.0315	0.0315	1.92	1.844	0.0315	0.0315
IhNFGLIQEK-P49748-H2zsw-TMT	0.0315	0.801	0.868	0.0315	0.0315	1.232	1.256	0.0315	0.0315	1.001	1.174	0.0315	0.0315	0.965	1.082	0.0315	0.0315	0.967	1.033	0.0315
IVLTNPVcTEVGEK-P41091-C8zsw-TMT	0.0315	1.006	0.99	1.019	0.0315	0.869	1.07	1.113	0.0315	0.869	0.827	0.893	0.0315	0.819	0.895	0.94	0.0315	1.032	0.941	0.901
MTEEEVEMLVAGhEDSNGcINYEELVR-G8JLA2-H13zsw-TMT C19zsw-TMT	0.685	0.875	0.913	0.879	1.082	0.546	0.606	0.561	0.806	0.641	0.627	0.502	1.431	0.881	1.02	1.008	1.792	1.282	1.183	1.173
ADATNVNNWhWTER-O95433-H10zsw-TMT	0.0315	0.852	1.018	0.0315	0.0315	1.033	1.427	0.0315	0.0315	1.182	1.401	0.0315	0.0315	1.133	1.494	0.0315	0.0315	1.373	1.486	0.0315
NDSFTTcIELGK-D6W5C0-C7zsw-TMT	0.981	1.044	0.0315	0.696	1.013	1.07	0.0315	0.884	1.091	1.109	0.0315	1.002	0.892	0.938	0.0315	0.684	0.768	0.853	0.0315	0.623
EYcIQAFESFVR-A8K8U1-C3zsw-TMT	1.182	1.082	1.364	1.236	0.87	0.808	0.848	0.922	0.946	0.809	0.993	0.942	1.168	1.1	1.159	1.172	0.983	0.89	0.986	0.895
ITIADcGQLE-A8K486-C6zsw-TMT	1.129	0.0315	0.88	0.0315	1.054	0.0315	0.523	0.0315	0.948	0.0315	0.347	0.0315	1.259	0.0315	0.0315	0.0315	1.177	0.0315	0.0315	0.0315
DGNASGTTLLEALDcILPPTRPTDKPLR-P68104-C15zsw-TMT	0.0315	1.53	1.61	1.665	0.0315	0.727	0.628	0.554	0.0315	0.64	0.524	0.661	0.0315	1.063	0.866	0.871	0.0315	0.854	0.742	0.778
STLINSLFLTDLYSPEYPGPShR-Q59EY4-H22zsw-TMT	0.0315	0.0315	0.96	1.059	0.0315	0.0315	1.145	0.909	0.0315	0.0315	0.877	0.81	0.0315	0.0315	1.106	0.863	0.0315	0.0315	1.133	0.991
AFQYVEThGEVcPANWTPDSPTIKPSPAASK-P30048-H8zsw-TMT C12Carboxymethyl	0.0315	1.425	1.333	0.0315	0.0315	1.781	1.354	0.0315	0.0315	2.18	1.742	0.0315	0.0315	1.449	1.049	0.0315	0.0315	1.253	0.985	0.0315
QIcLVMLETLSQSPQGR-Q15365-C3zsw-TMT	1.17	1.104	1.129	1.064	0.833	0.965	0.787	0.745	0.953	1.195	1.01	1.084	1.062	1.388	0.929	1.017	0.846	1.213	1.085	0.874
FDENDVITcF-Q00839-C9zsw-TMT	1.067	1.076	1.202	1.113	1.082	1.063	1.172	1.137	1.061	0.988	1.124	1.129	1.165	1.018	1.067	0.954	1.185	1.126	1.232	1.142
EGILSDEIYcPPETAVLLGSYAVQAK-E7EQR4-C10zsw-TMT	0.0315	0.987	1.016	0.0315	0.0315	0.817	0.694	0.0315	0.0315	0.578	0.523	0.0315	0.0315	0.937	0.892	0.0315	0.0315	1.049	1.155	0.0315
WMEAcLGEDLPPTTELEEGLR-A0A0J9YXZ5-C5zsw-TMT	0.915	1.038	0.0315	0.0315	0.754	0.942	0.0315	0.0315	0.959	0.787	0.0315	0.0315	1.048	1.027	0.0315	0.0315	1.163	1.139	0.0315	0.0315
DASIVGFFDDSFSEAhSEFLK-P30101-H16zsw-TMT	0.72	0.912	1.07	0.84	2.027	1.555	1.491	1.377	0.987	1.07	1.124	1.019	0.641	0.9	0.698	0.832	0.912	1.218	1.031	1.642
VIFDIVDLcTTWEAMEK-A0A0A0MSS8-C9zsw-TMT	0.0315	1.448	0.0315	1.885	0.0315	0.718	0.0315	0.709	0.0315	1.008	0.0315	0.911	0.0315	0.487	0.0315	0.802	0.0315	1.242	0.0315	1.469
AVSELAGhQTSAESWGTGR-P36578-H8zsw-TMT	0.0315	0.0315	0.937	0.97	0.0315	0.0315	1.495	1.695	0.0315	0.0315	1.174	1.436	0.0315	0.0315	1.57	1.245	0.0315	0.0315	1.479	1.019
TIAPcQK-B7Z4V2-C5zsw-TMT	0.903	0.918	0.0315	1.109	1.237	1.169	0.0315	1.229	1.376	1.231	0.0315	1.445	1.009	1.025	0.0315	1.048	0.907	1.058	0.0315	1.023
TVEAEAAhGTVTR-Q0QER2-H8zsw-TMT	0.705	0.0315	0.84	0.561	1.184	0.0315	1.453	0.689	1.247	0.0315	1.905	0.406	0.676	0.0315	0.746	0.251	1.324	0.0315	1.559	1.382
VSQPIEGhAASFAQFK-Q00610-H8zsw-TMT	0.838	0.787	0.0315	0.985	1.234	1.381	0.0315	1.191	1.461	1.363	0.0315	1.374	1.006	1.08	0.0315	1.337	0.822	1.122	0.0315	1.169
hSFGPLDYESLQQELALK-B8ZZC5-H1zsw-TMT	0.0315	0.0315	1.093	1.001	0.0315	0.0315	0.989	0.922	0.0315	0.0315	0.971	1.132	0.0315	0.0315	1.263	0.98	0.0315	0.0315	1.226	0.935
hDADGQATLLNLLLR-B3KNN7-H1zsw-TMT	1.133	1.19	0.0315	0.0315	0.901	0.71	0.0315	0.0315	0.89	0.875	0.0315	0.0315	1.003	1.161	0.0315	0.0315	0.996	0.934	0.0315	0.0315
YVATLGVEVHPLVFhTNR-F5H018-H15zsw-TMT	0.97	1.136	0.0315	0.0315	1.017	0.874	0.0315	0.0315	1.229	1.11	0.0315	0.0315	1.238	1.018	0.0315	0.0315	1.061	0.866	0.0315	0.0315
YYVTIIDAPGhR-P68104-H11zsw-TMT	1.019	0.0315	1.081	1.072	0.951	0.0315	0.944	0.91	1.17	0.0315	1.17	1.204	1.293	0.0315	1.305	1.439	1.168	0.0315	0.973	0.954
DGVADVSIEDSVISLSGDHcIIGR-P00441-C20zsw-TMT	0.0315	0.0315	0.815	1.093	0.0315	0.0315	0.707	0.815	0.0315	0.0315	0.828	0.883	0.0315	0.0315	0.75	0.829	0.0315	0.0315	0.999	0.985
YDLLcLEGLVR-Q9BR63-C5zsw-TMT	1.37	0.0315	0.0315	1.04	0.916	0.0315	0.0315	0.861	0.933	0.0315	0.0315	0.775	1.292	0.0315	0.0315	1.204	1.115	0.0315	0.0315	0.85
hIVLSGGSTMYPGLPSR-B4DWQ5-H1zsw-TMT	0.905	0.961	0.937	1.044	0.965	0.787	0.881	0.946	0.882	0.89	0.879	1.012	0.91	0.786	0.963	1.057	1.014	0.873	0.793	0.909
LEcGGGPWGNK-P00352-C3zsw-TMT	1.097	0.981	1.112	1.021	1.11	0.97	0.989	1.026	1.08	0.941	0.842	0.868	0.818	0.676	0.815	0.691	0.908	0.736	0.699	0.756
TTGIVMDSGDGVThTVPIYEGYALPhAILR-Q8WVW5-H14zsw-TMT H26zsw-TMT	0.0315	0.0315	0.7	0.702	0.0315	0.0315	0.93	0.892	0.0315	0.0315	0.831	0.702	0.0315	0.0315	1.044	0.883	0.0315	0.0315	0.827	0.85
ALAGcDFLTISPK-P37837-C5zsw-TMT	0.997	1.187	1.042	1.119	0.59	0.621	0.533	0.627	0.589	0.786	0.687	0.662	0.557	0.704	0.713	0.609	0.701	0.789	0.746	0.759
GTVVYGEPITASLGTDGShYWSK-Q16555-H19zsw-TMT	0.0315	0.831	1.139	0.0315	0.0315	1.121	1.462	0.0315	0.0315	1.163	1.362	0.0315	0.0315	0.983	1.085	0.0315	0.0315	1.201	1.363	0.0315
hAVSEGTK-A8K9J7-H1zsw-TMT	0.556	0.951	0.871	0.79	0.851	1.838	1.91	1.561	0.336	1.687	3.008	2.138	0.0315	0.839	1.134	0.92	0.0315	1.315	1.431	0.989
GAGTDDhTLIR-P08758-H7zsw-TMT	0.0315	0.0315	1.009	0.957	0.0315	0.0315	1.155	1.019	0.0315	0.0315	0.903	1.017	0.0315	0.0315	0.926	1.146	0.0315	0.0315	1.162	0.945
ILFDTVDLcATWEAMEK-P52895-C9zsw-TMT	1.51	1.099	1.275	1.13	1.21	1.041	0.789	1.032	1.193	0.929	1.046	1.008	0.739	0.621	0.598	0.72	2.245	1.427	1.773	2.109
ILFDTVDLcATWEAVEK-Q04828-C9zsw-TMT	1.425	1.383	1.38	1.362	0.562	0.532	0.425	0.506	0.861	0.791	0.793	0.781	0.485	0.464	0.479	0.468	0.556	0.472	0.533	0.584
EAGDVcYADVYR-Q07955-C6zsw-TMT	1.001	0.913	0.917	0.925	1.307	1.094	1.249	1.102	1.153	1.167	1.21	1.04	0.956	0.965	1.079	0.909	1.288	0.833	0.974	0.83
hLEINPDHPIVETLR-P08238-H1zsw-TMT	0.829	0.829	0.925	0.842	1.009	1	1.12	0.824	1.416	1.217	1.418	1.166	1.433	1.4	1.406	1.23	1.098	1.077	1.068	0.764
EDFATFDYILcMDESNLR-P24666-C11zsw-TMT	1.658	1.321	1.619	1.258	0.79	1.176	0.943	0.998	0.839	0.741	0.997	0.938	0.892	1.19	1.101	1.079	1.434	1.678	1.735	1.699
FcIWTESAFR-B4DMJ6-C2zsw-TMT	1.011	1.114	0.0315	0.0315	0.675	0.761	0.0315	0.0315	0.856	0.747	0.0315	0.0315	0.886	0.969	0.0315	0.0315	0.783	0.775	0.0315	0.0315
hQAQIDHYLGLANK-F8W914-H1zsw-TMT	0.99	0.861	0.858	0.828	1.244	1.193	1.276	1.162	1.088	0.99	0.964	0.831	1.016	0.906	0.988	0.843	1.03	1.173	0.981	0.824
LIAEQLLYEhWK-F5GWH6-H10zsw-TMT	0.866	0.0315	0.0315	0.814	1.62	0.0315	0.0315	1.413	2.434	0.0315	0.0315	1.735	0.987	0.0315	0.0315	0.978	1.231	0.0315	0.0315	1.246
LNDGhFMPVLGFGTYAPPEVPR-A0A0A0MSS8-H5zsw-TMT	0.0315	1.258	0.0315	1.636	0.0315	0.845	0.0315	0.742	0.0315	1.057	0.0315	0.87	0.0315	1.206	0.0315	0.841	0.0315	1.021	0.0315	0.993
hYTEAIK-A8K690-H1zsw-TMT	0.0315	0.0315	0.876	0.81	0.0315	0.0315	1.421	1.261	0.0315	0.0315	1.045	1.184	0.0315	0.0315	1.067	1.036	0.0315	0.0315	1.283	1.459
DThDQLSEPSEVR-Q15149-H3zsw-TMT	0.676	0.75	0.65	0.609	0.9	0.982	1.028	0.972	0.832	0.77	0.785	0.716	0.823	0.813	0.942	0.827	1.023	0.886	1.036	0.96
MEEFKDQLPADEcNK-B7Z4V2-C13zsw-TMT	0.914	0.932	0.823	1.173	1.309	1.564	1.478	1.464	1.572	1.538	1.295	1.574	0.978	1.053	1.106	1.321	1.002	1.137	1.191	1.226
LLDLVQQScNYK-P55769-C9zsw-TMT	0.0315	1.009	0.902	0.952	0.0315	0.836	0.924	0.855	0.0315	1.14	1.15	1.012	0.0315	1.002	1.004	1.127	0.0315	0.967	0.938	0.89
GFAFVTFDDhDTVDK-B4E3E6-H10zsw-TMT	0.866	1.035	0.909	0.836	0.865	0.901	1.077	0.939	0.871	0.935	1.066	0.969	0.792	0.831	0.939	1.111	0.67	0.622	0.823	0.777
HGEVcPAGWKPGSETIIPDPAGK-Q13162-C5zsw-TMT	0.904	0.984	0.854	0.0315	0.966	0.854	0.852	0.0315	1.199	1.426	1.16	0.0315	1.167	1.456	1.096	0.0315	1.229	1.245	1.159	0.0315
hLEINPDhSIIETLR-P07900-H1zsw-TMT H8zsw-TMT	0.883	0.807	0.0315	0.857	0.76	0.89	0.0315	0.82	0.96	1.03	0.0315	0.955	1.835	1.657	0.0315	1.666	0.934	0.889	0.0315	0.872
SLAGSSGPGASSGTSGDhGELVVR-E9PK01-H18zsw-TMT	0.741	0.563	0.0315	0.0315	1.074	1.123	0.0315	0.0315	1.347	1.028	0.0315	0.0315	1.038	0.843	0.0315	0.0315	1.396	1.135	0.0315	0.0315
EYLPIGGLAEFcK-A0A024R6W0-C12zsw-TMT	1.056	1.138	1.118	1.205	0.88	0.903	0.997	0.966	0.874	0.978	1.017	1.01	1.111	1.244	1.094	1.176	0.777	0.975	0.96	1.033
EPWLLPSQhNDIIR-Q14697-H9zsw-TMT	0.0315	0.975	0.981	1.023	0.0315	0.938	1.204	1.069	0.0315	1.173	1.29	1.062	0.0315	1.036	1.054	1.1	0.0315	0.87	1.097	1.14
GIDQcIPLFVEAALER-O95373-C5zsw-TMT	1.003	0.895	1.171	1.163	0.806	0.856	0.908	0.984	0.601	0.648	0.681	0.804	0.915	1.225	1.204	1.018	1.07	0.859	1.293	1.08
GLLDVTcK-E5RJR5-C7zsw-TMT	1.152	1.19	1.05	0.952	0.958	0.955	1.057	1.078	1.005	1.048	0.958	1.02	1.18	1.154	1.224	1.259	1.034	1.068	1.193	1.249
SAEFLLhMLK-A0A087WXM6-H7zsw-TMT	0.783	1.082	1.129	1.014	0.939	0.963	0.767	0.878	0.829	0.936	1.028	0.967	0.867	0.973	1.427	1.21	0.576	0.697	0.836	0.744
IcHQIEYYFGDFNLPR-B5BUB5-C2zsw-TMT	1.008	0.974	0.985	1.089	0.868	0.759	0.707	0.678	0.962	0.903	1.008	0.899	1.023	1.022	1.017	0.968	0.742	0.669	0.801	0.689
ILFIFIDSDhTDNQR-P07237-H10zsw-TMT	0.979	0.829	1.082	0.907	1.054	1.024	0.941	0.958	1.276	1.4	1.401	1.163	0.993	0.84	0.801	0.832	0.897	0.909	0.859	0.7
ShSAHFFEFLTK-P30046-H2zsw-TMT	1.022	0.0315	1.008	1.075	0.911	0.0315	0.902	0.989	0.77	0.0315	0.895	1.01	1.022	0.0315	1.075	1.278	0.783	0.0315	0.754	1.01
FLGVAEQLhNEGFK-A8K134-H9zsw-TMT	0.0315	1.024	1.028	0.755	0.0315	0.969	0.911	0.774	0.0315	1.068	1.136	1.053	0.0315	1.225	1.364	1.344	0.0315	1.93	1.698	1.431
EGILNDDIYcPPETAVLLASYAVQSK-P26038-C10zsw-TMT	1.009	1.153	1.195	1.327	0.616	0.491	0.362	0.444	0.581	0.331	0.466	0.45	0.475	0.531	0.539	0.412	0.823	0.799	0.69	0.704
NVNAGGhK-P21796-H7zsw-TMT	0.776	0.796	0.0315	0.777	1.408	1.557	0.0315	1.361	2.086	2.222	0.0315	1.636	1.129	1.243	0.0315	0.823	1.164	1.344	0.0315	1.031
VWYVSNIDGThLAK-B4DE36-H11zsw-TMT	1.109	0.0315	0.0315	1.064	0.925	0.0315	0.0315	0.963	0.94	0.0315	0.0315	0.976	0.956	0.0315	0.0315	1.009	1.041	0.0315	0.0315	0.924
DDVFLSVPcILGQNGISDLVK-P00338-C9zsw-TMT	1.869	1.871	1.626	1.88	1.158	0.958	0.816	0.887	0.983	0.793	0.75	0.843	1.037	0.899	0.681	0.772	1.779	2.025	1.549	2.071
SHFEQWGTLTDcVVmR-F8W6I7-C12zsw-TMT M15Oxidation	0.966	0.0315	0.0315	0.976	0.866	0.0315	0.0315	0.783	1.001	0.0315	0.0315	1.012	0.777	0.0315	0.0315	0.87	0.648	0.0315	0.0315	0.78
LLLAGYDDFNcNVWDALK-B2R6K4-C11zsw-TMT	0.0315	1.092	1.047	0.0315	0.0315	1.244	1.326	0.0315	0.0315	0.949	0.793	0.0315	0.0315	0.869	0.865	0.0315	0.0315	1.207	1.118	0.0315
AYHEQLTVAEITNAcFEPANQMVK-Q53GA7-C15zsw-TMT	0.0315	1.051	1.117	1.209	0.0315	0.633	0.884	0.828	0.0315	0.678	0.9	0.795	0.0315	0.975	0.985	0.879	0.0315	0.641	1.011	0.856
IMLFTNEDNPhGNDSAK-P12956-H11zsw-TMT	1.04	0.935	0.978	0.908	1.137	1.454	1.15	1.241	1.19	1.401	1.137	1.204	1.032	1.094	0.987	1.016	0.994	1.226	0.949	1.052
APIRPDIVNFVhTNLR-B4DMJ6-H12zsw-TMT	0.943	0.998	0.0315	0.0315	0.942	0.774	0.0315	0.0315	0.96	0.958	0.0315	0.0315	1.802	2.045	0.0315	0.0315	1.155	1.025	0.0315	0.0315
GLDVDSLVIEhIQVNK-A0A087WXM6-H11zsw-TMT	1.066	1.041	1.055	1.027	0.845	0.874	0.805	0.879	0.937	0.986	1.011	0.853	0.946	1.062	0.999	0.952	0.914	0.93	0.84	0.78
DAGYEFDIcF-P18669-C9zsw-TMT	0.0315	0.0315	0.996	0.84	0.0315	0.0315	1.088	0.771	0.0315	0.0315	0.742	0.688	0.0315	0.0315	0.711	0.666	0.0315	0.0315	1.327	1.386
AVEEYScEFGSAK-F8VVM2-C7zsw-TMT	0.973	1.022	0.0315	0.991	1.147	1.068	0.0315	1.153	1.04	1.046	0.0315	1.003	0.863	0.968	0.0315	0.932	1.062	1.151	0.0315	1.005
TIQFVDWcPTGFK-Q53GA7-C8zsw-TMT	0.0315	0.0315	1.066	1.075	0.0315	0.0315	0.67	0.758	0.0315	0.0315	0.707	0.935	0.0315	0.0315	0.977	1.029	0.0315	0.0315	0.785	0.89
NAINTEMYhEIMR-B4DLL3-H9zsw-TMT	0.887	1.037	0.995	0.0315	0.953	1.31	1.238	0.0315	1.409	1.939	1.716	0.0315	1.1	1.424	1.262	0.0315	1.185	1.295	1.284	0.0315
hIDcAYVYQNEHEVGEAIQEK-O60218-H1zsw-TMT C4Carboxymethyl	1.052	0.0315	0.706	0.991	0.571	0.0315	0.543	0.858	0.438	0.0315	0.45	0.693	0.491	0.0315	0.303	0.578	0.357	0.0315	0.387	0.62
DGQWFTDWDAVPhSR-Q08J23-H13zsw-TMT	0.81	0.0315	0.0315	0.94	1.046	0.0315	0.0315	1.225	1.169	0.0315	0.0315	1.316	1.269	0.0315	0.0315	1.258	1.094	0.0315	0.0315	1.348
IYSALILhDDEVTVTEDK-Q6FG99-H8zsw-TMT	0.77	0.774	0.0315	0.0315	1.077	0.894	0.0315	0.0315	1.068	0.997	0.0315	0.0315	0.678	0.711	0.0315	0.0315	0.925	0.828	0.0315	0.0315
FYVhNDIFR-Q13283-H4zsw-TMT	1.094	0.0315	1.014	1.062	1.055	0.0315	1.058	1.016	1.001	0.0315	1.063	0.933	1.182	0.0315	1.257	1.252	1.103	0.0315	1.13	1.108
IhVSDQELQSANASVDDSR-P22314-H2zsw-TMT	0.979	0.624	0.443	0.801	1.045	0.974	1.231	1.13	1.318	1.099	1.07	1.179	1.096	1.37	1.618	1.37	1.205	1.289	1.294	1.435
LIDFLEcGK-B4DN41-C7zsw-TMT	1.076	0.0315	0.0315	1.09	0.816	0.0315	0.0315	0.807	0.791	0.0315	0.0315	0.734	1.093	0.0315	0.0315	1.34	0.963	0.0315	0.0315	1.074
ELEQVcNPIISGLYQGAGGPGPGGFGAQGPK-A0A1U9X7W4-C6zsw-TMT	1.199	1.346	1.044	1.181	0.958	0.726	0.636	0.832	0.942	0.99	0.853	1.064	1.376	1.29	1.001	1.113	1.145	1.024	0.866	1.11
SELhIENLNMEADPGQYR-A0A087X2B5-H4zsw-TMT	0.839	0.0315	0.907	0.0315	1.035	0.0315	1.219	0.0315	1.673	0.0315	1.603	0.0315	0.971	0.0315	1.065	0.0315	0.948	0.0315	1.239	0.0315
SLDQTDMHGDSEYNIMFGPDIcGPGTK-P27797-C22zsw-TMT	1.1	0.0315	0.964	1.021	1.37	0.0315	1.524	1.338	1.188	0.0315	1.077	1.194	1.044	0.0315	0.946	0.972	1.14	0.0315	0.991	1.053
YALQmEQLNGILLhLESELAQTR-B2RA03-M5Oxidation H14zsw-TMT	1.073	1.001	1.045	1.41	0.831	0.982	0.89	1.048	0.982	0.849	1.216	1.065	1.195	0.828	1.165	1.157	1.315	1.38	1.465	1.428
YQLLQLVEPFGVISNhLILNK-P43243-H16zsw-TMT	1.179	0.993	1.032	0.895	1.185	1.726	1.044	1.261	1.245	1.39	1.359	1.377	1.039	0.975	0.828	0.668	1.156	1.285	1.208	0.969
NcSETQYESK-P61981-C2zsw-TMT	1.006	1.086	1.016	1.427	1.024	1.032	1.005	1.333	0.755	0.997	0.766	0.939	0.829	0.977	0.916	0.921	0.933	1.008	1.009	1.15
KGYEVIYLTEPVDEYcIQALPEFDGK-Q5CAQ5-C16zsw-TMT	1.174	1.001	1.123	0.861	1.377	1.147	1.229	0.988	0.983	0.781	0.899	0.513	0.955	0.82	0.97	0.942	1.177	1.108	1.373	0.687
YTcGEAPDYDR-A4UJ43-C3zsw-TMT	1.037	0.948	0.0315	0.991	0.982	0.95	0.0315	1.028	0.946	0.944	0.0315	0.995	1.027	0.969	0.0315	1.116	0.931	0.884	0.0315	0.961
FShEEIAMATVTALR-P04075-H3zsw-TMT	0.896	1.072	1.055	1.013	0.759	0.846	0.865	0.816	0.762	0.811	0.887	0.833	0.674	0.844	0.896	0.835	0.897	1.23	1.29	0.904
GYLGPEQLPDcLK-Q75MT9-C11zsw-TMT	0.997	1.063	1.061	0.0315	0.865	0.88	0.939	0.0315	1.17	0.959	1.008	0.0315	0.875	0.824	0.906	0.0315	0.616	0.815	0.735	0.0315
hEQEYMEVR-F5GX39-H1zsw-TMT	0.888	1.144	0.943	1.097	1.571	1.395	1.221	1.402	1.517	1.352	1.156	1.24	0.903	0.886	0.872	1.04	1.3	1.143	1.19	1.835
AGAIAPcEVTVPAQNTGLGPEK-P05388-C7zsw-TMT	0.994	0.986	1.007	0.86	0.718	0.985	1.017	0.969	0.58	0.84	1.061	0.872	0.39	0.662	0.927	0.829	0.25	0.489	0.861	0.893
VMEhFIK-P11021-H4zsw-TMT	0.0315	0.0315	0.0315	0.674	0.0315	1.026	0.0315	1.244	0.0315	0.0315	0.0315	1.766	0.0315	0.0315	0.0315	1.414	0.0315	0.0315	0.0315	1.352
GVLFGVPGAFTPGcSK-V9HW35-C14zsw-TMT	0.991	1.141	0.993	1.031	0.911	0.888	0.893	1.045	1.102	1.042	0.93	1.04	1.277	1.155	1.136	0.975	0.981	0.999	0.986	0.993
AQDIEAGDGTTSVVIIAGSLLDScTK-B7Z9L0-C24zsw-TMT	1.218	1.014	1.096	1.1	1.181	1.125	1.165	1.081	0.805	0.685	0.799	0.691	1.068	1.063	1.044	0.983	1.341	1.103	0.94	0.964
DIVhSGLAYTMER-B4DMF5-H4zsw-TMT	0.805	0.879	0.917	0.776	1.176	1.236	1.168	1.186	1.486	1.331	1.397	1.672	0.942	0.921	1.019	0.87	0.684	0.818	0.802	0.596
IYPhGLVLLDLQSYDGDAQGK-H7C2R7-H4zsw-TMT	1.186	0.0315	0.0315	1.222	0.873	0.0315	0.0315	0.93	1.063	0.0315	0.0315	1.09	1.04	0.0315	0.0315	1.242	1.151	0.0315	0.0315	0.918
IDDIVSGhK-B3KX11-H8zsw-TMT	1.16	0.0315	1.006	0.891	1.031	0.0315	0.985	0.87	0.857	0.0315	1.023	0.885	0.758	0.0315	1.047	0.931	0.918	0.0315	0.917	0.916
ADLTEYLSThYK-P31930-H10zsw-TMT	0.864	0.883	0.994	0.811	0.984	0.955	1.097	1.134	1.531	1.337	1.55	1.119	1.085	1.026	0.852	0.875	0.999	0.948	0.924	0.748
SVVLMShLGRPDGVPMPDK-P00558-H7zsw-TMT	1.348	0.0315	0.908	0.656	0.988	0.0315	0.96	0.706	1.235	0.0315	0.867	0.498	0.866	0.0315	0.672	0.408	1.024	0.0315	0.539	0.244
HGLEVIYMIEPIDEYcVQQLK-P07900-C16zsw-TMT	1.25	1.039	1.271	1.144	0.965	0.873	0.868	0.878	0.813	0.65	0.827	0.76	1.508	1.183	1.271	1.397	1.046	1.031	0.954	1.026
ALYDTFSAFGNILScK-A0A087WTT1-C15zsw-TMT	1.155	0.0315	0.0315	1.301	1.113	0.0315	0.0315	1.018	0.876	0.0315	0.0315	0.78	1.13	0.0315	0.0315	1.05	0.98	0.0315	0.0315	0.843
EhINLGcDMDFDIAGPSIR-P21796-H2zsw-TMT C7zsw-TMT	1.073	0.974	1.16	1	0.775	0.769	0.728	0.782	0.934	0.955	0.979	1.01	1.311	1.229	1.041	1.036	0.828	0.803	0.778	0.834
EDGVFNISVDNTcSLFR-P49915-C13zsw-TMT	0.0315	0.971	1.059	0.0315	0.0315	0.722	0.711	0.0315	0.0315	0.607	0.657	0.0315	0.0315	0.823	0.78	0.0315	0.0315	0.815	0.796	0.0315
DNIAcVILTFK-Q2VF42-C5zsw-TMT	1.177	0.0315	1.146	0.0315	0.629	0.0315	0.594	0.0315	0.667	0.0315	0.607	0.0315	0.778	0.0315	0.788	0.0315	0.828	0.0315	0.852	0.0315
ShYEEGPGK-D6R9Z7-H2zsw-TMT	0.0315	1.08	0.936	0.0315	0.0315	0.921	1.063	0.0315	0.0315	1.343	1.958	0.0315	0.0315	0.658	0.683	0.0315	0.0315	0.741	1.008	0.0315
ETAENYLGhTAK-B7Z4V2-H9zsw-TMT	1.096	0.656	0.984	0.0315	1.51	1.213	1.528	0.0315	1.753	1.193	1.747	0.0315	1.394	1.035	1.249	0.0315	1.499	1.004	1.271	0.0315
LWcTYHEK-P15121-C3zsw-TMT	0.0315	0.0315	1.342	1.309	0.0315	0.0315	0.82	0.776	0.0315	0.0315	0.687	0.724	0.0315	0.0315	0.789	0.673	0.0315	0.0315	0.978	1.019
FWEVISDEhGIDPTGTYhGDSDLQLDR-P07437-H9zsw-TMT H18zsw-TMT	0.702	0.528	0.666	0.837	1.325	1.024	1.077	1.423	1.393	1.078	1.042	1.528	1.22	0.953	1.014	1.469	1.086	0.791	0.659	1.615
AhQVVEDGYEFFAK-Q9UPN1-H2zsw-TMT	0.0315	1.051	0.948	1.044	0.0315	1.112	1.056	1.04	0.0315	1.173	1.002	1.262	0.0315	1.013	0.944	1.144	0.0315	1.101	1.07	1.116
hVGMAVAGLLADAR-P25788-H1zsw-TMT	0.0315	0.0315	1.015	0.9	0.0315	0.0315	0.807	0.867	0.0315	0.0315	1.039	0.898	0.0315	0.0315	0.962	0.828	0.0315	0.0315	0.984	0.793
AELFTQScADLDK-D6W5C0-C8zsw-TMT	0.956	0.0315	0.0315	0.85	1.709	0.0315	0.0315	1.363	1.216	0.0315	0.0315	1.13	0.821	0.0315	0.0315	0.822	1.24	0.0315	0.0315	1.112
GYGFcEYQDQETALSAMR-B4DUD5-C5zsw-TMT	0.0315	1.306	1.12	0.0315	0.0315	1.137	1.127	0.0315	0.0315	1.199	1.181	0.0315	0.0315	1.117	1.115	0.0315	0.0315	0.941	1.256	0.0315
LGDVISIQPcPDVK-P55072-C10zsw-TMT	1.204	1.165	0.0315	1.018	0.849	0.73	0.0315	0.835	0.85	0.694	0.0315	0.779	0.875	0.786	0.0315	0.776	0.929	0.71	0.0315	0.754
QADLYISEGLhPR-B4DPJ8-H11zsw-TMT	0.823	0.921	0.603	0.433	0.979	1.384	0.812	0.893	0.906	1.02	0.834	0.772	1.229	1.274	1.121	0.897	1.062	1.301	0.956	0.676
SAGWNIPIGLLYcDLPEPR-A0A0K0K1H8-C13zsw-TMT	1.241	1.262	0.0315	0.0315	2.675	3.083	0.0315	0.0315	1.12	1.273	0.0315	0.0315	0.909	1.205	0.0315	0.0315	0.969	0.98	0.0315	0.0315
NVIIWGNhSSTQYPDVNHAK-P40925-H8zsw-TMT	0.0315	0.0315	0.983	1.168	0.0315	0.0315	1.181	1.309	0.0315	0.0315	1.416	1.409	0.0315	0.0315	1.206	1.014	0.0315	0.0315	1.319	1.436
VFANPEDcVAFGK-F5H7F6-C8zsw-TMT	0.712	0.0315	0.0315	0.851	0.712	0.0315	0.0315	0.773	1.236	0.0315	0.0315	1.206	0.621	0.0315	0.0315	0.784	0.566	0.0315	0.0315	0.854
DALLSALSIQNYHLEcNETK-D6W5C0-C16zsw-TMT	1.109	1.044	1.029	0.975	1.28	0.931	0.821	0.906	0.977	0.992	0.914	0.852	0.756	0.806	0.723	0.79	0.844	0.809	1.067	0.714
ILGPGAGEMVNEAALALEYGAScEDIAR-B4DFL1-C23zsw-TMT	0.0315	0.0315	1.128	1.048	0.0315	0.0315	0.941	0.748	0.0315	0.0315	0.646	0.739	0.0315	0.0315	0.657	0.333	0.0315	0.0315	0.885	0.672
YhQIGSGK-B4DTA2-H2zsw-TMT	0.842	0.845	0.974	0.799	1.941	1.904	1.967	1.73	2.053	1.693	1.671	1.59	0.951	0.896	1.05	0.967	1.441	1.306	1.386	1.191
AILQENGcLSDSDMFSQAGLR-P42704-C8zsw-TMT	0.0315	1.018	0.0315	1.016	0.0315	0.894	0.0315	0.801	0.0315	1.2	0.0315	0.982	0.0315	1.126	0.0315	0.932	0.0315	1.096	0.0315	0.855
IcDQWDNLGALTQK-B7Z565-C2zsw-TMT	0.0315	1.109	0.0315	0.994	0.0315	0.861	0.0315	0.996	0.0315	0.948	0.0315	0.772	0.0315	0.89	0.0315	0.75	0.0315	0.864	0.0315	0.684
EETVLATVQALQTAShLSQQADLR-P04844-H16zsw-TMT	0.0315	0.901	0.0315	1.092	0.0315	1.023	0.0315	0.952	0.0315	0.844	0.0315	0.925	0.0315	0.827	0.0315	0.946	0.0315	0.966	0.0315	0.976
FDhIFYTGNTAVGK-I3L1M4-H3zsw-TMT	0.934	0.813	0.0315	0.0315	1.181	1.125	0.0315	0.0315	1.09	1.08	0.0315	0.0315	0.811	0.815	0.0315	0.0315	0.959	0.828	0.0315	0.0315
hLAGLGLTEAIDK-P50454-H1zsw-TMT	0.982	1.002	0.973	0.816	1.026	1.011	1.124	1.454	1.115	0.924	1.067	0.911	0.982	0.796	1.088	0.761	1.013	0.923	1.19	1.022
HGEVcPAGWKPGSDTIKPDVQK-Q06830-C5zsw-TMT	1.237	1.269	1.2	1.323	0.981	0.955	0.96	0.958	1.446	1.324	1.513	1.276	1.047	1.073	1.149	1.171	1.931	1.868	1.954	1.828
ALANVNIGSLIcDVGAGGPAPAAGAAPAGGPAPSTAAAPAEEK-Q6FG99-C12zsw-TMT	0.798	0.805	1.103	0.0315	0.778	0.909	0.818	0.0315	0.56	0.918	0.774	0.0315	1.132	0.801	0.77	0.0315	0.867	1.01	0.826	0.0315
hTLADNFNPVSEER-H0YGT2-H1zsw-TMT	0.726	0.857	0.976	0.0315	1.353	1.265	1.345	0.0315	1.482	1.312	1.251	0.0315	1.097	0.867	1.116	0.0315	1.135	1.053	1.147	0.0315
GFcYVEFDEVDSLK-Q15056-C3zsw-TMT	1.028	0.667	0.0315	0.0315	0.769	0.454	0.0315	0.0315	0.781	0.954	0.0315	0.0315	1.009	1.126	0.0315	0.0315	1.017	0.919	0.0315	0.0315
MITAAYVPLPTYhNLFPDSMTATQLLVPSR-Q6N037-H13zsw-TMT	0.962	1.292	1.478	0.0315	0.832	0.973	0.785	0.0315	1.131	0.927	1.084	0.464	1.084	0.896	0.783	0.0315	0.605	0.705	0.829	0.0315
NIDDGTSDRPYShALVAGIDR-E4W6B6-H13zsw-TMT	0.799	1.041	0.989	0.933	1.083	1.143	1.272	1.318	0.794	1.151	0.878	1.186	1.404	1.334	1.334	1.541	1.209	1.177	1.15	1.206
TFPTVNPTTGEVIGhVAEGDR-P30837-H15zsw-TMT	0.0315	0.0315	0.779	0.849	0.0315	0.0315	1.162	1.21	0.0315	0.0315	2.112	1.808	0.0315	0.0315	1.126	0.953	0.0315	0.0315	0.783	0.867
NKPPEIDITcWDADPVPEEEEGFEGGD-Q16643-C10zsw-TMT	0.811	0.843	0.0315	1.093	1.269	1.14	0.0315	1.487	0.719	0.678	0.0315	0.664	0.694	0.74	0.0315	1.094	1.107	0.944	0.0315	0.953
SHFEQWGTLTDcVVM-F8W6I7-C12zsw-TMT	1.207	1.062	1.144	1.126	0.832	0.743	0.644	0.738	1.057	0.934	0.768	0.943	1.176	0.892	0.75	0.878	0.915	0.92	0.776	0.791
LTFScLGGSDNFK-Q15185-C5zsw-TMT	1.125	1.195	1.09	1.136	0.669	0.679	0.728	0.742	0.751	0.842	0.942	0.873	0.867	0.924	0.992	0.867	0.643	0.814	0.764	0.736
hYLFDVQR-A8K4W2-H1zsw-TMT	0.0315	0.895	0.567	0.974	0.0315	1.173	0.0315	1.039	0.0315	0.948	0.672	1.406	0.0315	0.872	0.536	0.795	0.0315	0.728	0.538	0.825
IIhDFPQFYPLGIVQHD-B5MC59-H3zsw-TMT	1.089	1.03	0.0315	0.0315	0.898	0.965	0.0315	0.0315	0.939	1.003	0.0315	0.0315	1.185	1.091	0.0315	0.0315	1.069	0.955	0.0315	0.0315
LNIISNLDcVNEVIGIR-B4DQY1-C9zsw-TMT	0.0315	1.22	1.235	1.437	0.0315	0.883	0.898	0.945	0.0315	0.839	0.991	1.076	0.0315	1.208	1.195	1.218	0.0315	0.901	1.099	0.958
EGSGIGAIDSNLDWShNFTN-A0A0C4DGI3-H16zsw-TMT	1.152	0.881	0.0315	0.0315	1.066	1.386	0.0315	0.0315	0.946	0.82	0.0315	0.0315	0.903	0.948	0.0315	0.0315	0.888	0.936	0.0315	0.0315
NLLESYhVPELIK-P42704-H7zsw-TMT	0.771	0.0315	0.0315	1.057	0.698	0.0315	0.0315	0.912	0.762	0.0315	0.0315	0.901	0.687	0.0315	0.0315	1.045	0.595	0.0315	0.0315	0.818
NFESLSEAFSVASAAAVLSh-P04844-H20zsw-TMT	0.0315	0.864	1.092	0.93	0.0315	1.111	1.496	0.992	0.0315	1.007	1.159	0.849	0.0315	0.855	0.802	0.976	0.0315	1.174	1.089	0.961
QQYEQcMDLQLFYR-Q13813-C6zsw-TMT	0.876	0.0315	0.932	1.055	1.156	0.0315	1.321	1.353	0.786	0.0315	0.816	0.878	0.713	0.0315	0.802	0.874	0.841	0.0315	0.95	0.849
DhENIVIAK-P07237-H2zsw-TMT	0.989	0.852	0.881	1.009	1.51	1.527	1.709	1.814	1.362	1.765	1.888	2.091	0.922	0.693	0.792	0.932	1.195	1.158	1.121	1.116
LLVVPMDGShWF-A9UKF4-H10zsw-TMT	0.912	0.902	0.0315	0.0315	0.713	0.696	0.0315	0.0315	0.738	0.786	0.0315	0.0315	0.671	0.891	0.0315	0.0315	0.811	1.007	0.0315	0.0315
ATcAPQHGAPGPGPADASK-Q5HY54-C3zsw-TMT	0.843	0.945	0.822	0.755	0.793	0.732	0.956	0.745	0.548	0.666	0.695	0.666	0.639	0.624	0.71	0.758	1.035	1.068	1.256	1.033
NIHEScMSQIGWNR-Q2VF42-C6zsw-TMT	1.437	0.0315	1.343	0.0315	0.882	0.0315	0.639	0.0315	0.853	0.0315	0.605	0.0315	0.928	0.0315	0.653	0.0315	0.878	0.0315	0.687	0.0315
ADTEVVcAPPTAYIDFAR-V9HWK1-C7zsw-TMT	0.995	0.0315	1.064	0.984	1.001	0.0315	0.96	1.133	0.578	0.0315	0.781	0.658	0.77	0.0315	0.719	0.754	0.474	0.0315	0.661	0.616
GGDISVcEWYQR-P14854-C7zsw-TMT	0.976	1.105	0.949	1.13	0.941	1.012	1.012	1.156	1.02	1.12	1.121	1.099	0.773	0.747	0.879	0.968	0.765	0.881	0.868	0.896
SIEDFAhSSFQMAL-Q0QER2-H7zsw-TMT	1.165	1.194	1.107	1.118	1.035	0.993	0.991	0.88	0.952	1.136	1.035	1.135	1.068	1.058	0.978	1.019	0.977	1.457	1.317	1.19
LSSLIILMPhHVEPLER-P50454-H10zsw-TMT	1.055	0.875	0.756	1.092	0.954	0.925	0.6	0.893	1.136	1.084	0.568	1.031	1.336	1.386	0.6	1.231	1.075	0.943	0.994	1.084
LIALSIDSVEDhLAWSK-P30041-H12zsw-TMT	1.113	1.033	1.066	0.974	0.838	0.929	0.839	0.894	1.027	1.029	1.022	0.827	1.098	1.19	1.111	1.091	1.084	1.084	1.074	1.074
TTGIVmDSGDGVThTVPIYEGYALPH-Q8WVW5-M6Oxidation H14zsw-TMT	0.0315	0.0315	1.003	0.891	0.0315	0.0315	1.319	0.929	0.0315	0.0315	1.097	1.109	0.0315	0.0315	1.303	0.891	0.0315	0.0315	1.361	0.681
TVPIYEGYALPhAILR-Q8WVW5-H12zsw-TMT	0.0315	0.0315	0.938	0.905	0.0315	0.0315	1.066	0.902	0.0315	0.0315	1.076	0.809	0.0315	0.0315	1.057	0.91	0.0315	0.0315	1.022	0.807
VIhDNFGIVEGL-P04406-H3zsw-TMT	1.057	1.093	0.85	0.0315	0.64	0.728	0.711	0.0315	0.95	0.868	0.801	0.0315	1.03	0.995	0.864	0.0315	1.099	0.621	0.657	0.0315
DLPEhAVLK-Q00839-H5zsw-TMT	0.614	0.879	0.787	0.927	1.08	1.423	1.326	1.489	1.543	1.852	1.598	1.922	0.883	0.878	0.869	0.908	0.987	1.122	1.091	1.144
YKPVTNQVEcHPYLTQEK-O60218-C10zsw-TMT	1.906	2.045	1.406	1.98	0.436	0.346	0.842	0.333	0.456	0.436	0.815	0.426	0.425	0.384	0.694	0.416	0.472	0.362	0.773	0.513
MThNLLLNYGLYR-Q5TEE2-H3zsw-TMT	0.998	0.0315	0.96	0.0315	1.002	0.0315	0.875	0.0315	0.922	0.0315	0.82	0.0315	0.953	0.0315	0.899	0.0315	0.893	0.0315	0.612	0.0315
HLVGVcYTEDEAK-Q8TBT6-C6zsw-TMT	1.023	0.991	1.035	0.0315	1.104	1.214	1.311	0.0315	1.02	1.139	1.252	0.0315	1.06	1.084	1.166	0.0315	0.982	1.053	1.277	0.0315
SDALETLGFLNhYQMK-Q6NTA2-H12zsw-TMT	1.106	1.117	1.165	0.98	1.125	1.156	1.089	1.117	1.116	1.103	1.106	1.085	1.13	1.007	0.967	1.026	0.975	0.877	0.957	0.963
AVEKPPQTEhIEL-P23141-H10zsw-TMT	0.297	0.0315	0.624	0.472	0.27	0.0315	0.727	0.616	0.0315	0.0315	1.108	0.34	0.0315	0.0315	0.707	0.305	0.0315	0.0315	0.636	0.0315
VEFEELcADLFER-B7Z766-C7zsw-TMT	0.0315	1.139	0.0315	0.913	0.0315	1.236	0.0315	1.261	0.0315	0.895	0.0315	0.862	0.0315	1.156	0.0315	1.066	0.0315	1.111	0.0315	1
FMDQhPEMDFSK-Q9Y266-H5zsw-TMT	0.0315	0.846	0.941	0.876	0.0315	0.855	1.057	0.839	0.0315	1.195	1.063	1.047	0.0315	0.863	1.176	0.875	0.0315	1.134	1.053	1.171
LQEALDAEMLEDEAGGGGAGPGGAcK-H3BQZ7-C25zsw-TMT	0.0315	0.0315	0.957	1.052	0.0315	0.0315	1.152	1.315	0.0315	0.0315	1.045	0.987	0.0315	0.0315	1.117	1.096	0.0315	0.0315	0.946	1.104
LTAIDILTTcAADIQR-O75643-C10zsw-TMT	1.302	1.257	0.0315	1.237	1.014	0.942	0.0315	1.042	0.7	0.812	0.0315	0.89	1.222	0.914	0.0315	1.168	1.133	1.227	0.0315	1.174
ScHGWVLGEHGDSSVPVWSGMNVAGVSLK-P00338-C2zsw-TMT	1.228	1.037	0.0315	0.0315	0.86	0.654	0.0315	0.0315	0.933	0.946	0.0315	0.0315	1.101	0.888	0.0315	0.0315	0.838	0.819	0.0315	0.0315
AFVAIGDYNGhVGLGVK-P15880-H11zsw-TMT	1.086	0.0315	1.35	1.159	0.886	0.0315	0.908	0.867	0.822	0.0315	0.951	1.051	1.044	0.0315	1.554	1.361	1.028	0.0315	1.418	1.01
ELVTQQLPhLLK-Q99584-H9zsw-TMT	0.738	0.891	0.902	0.0315	1.21	1.123	1.187	0.0315	0.978	1.025	1.117	0.0315	0.935	0.985	1.116	0.0315	0.854	1.041	1.25	0.0315
VQNESFQYNEDQVVSSDIVNNThGSIFDATLTK-Q9NZ23-H23zsw-TMT	0.801	1.017	1.315	1.222	1.699	1.814	1.929	1.91	0.774	1.011	0.825	0.767	1.209	1.446	1.008	1.145	1.164	1.409	1.149	0.906
VDIQTEDLEDGTcK-O75369-C13zsw-TMT	0.0315	1.002	0.787	0.702	0.0315	0.931	0.859	0.839	0.0315	0.684	0.866	0.791	0.0315	0.684	0.731	0.793	0.0315	0.809	1.218	1.061
VGSSGDIALhINPR-M0QZ93-H10zsw-TMT	0.815	0.0315	0.0315	1.111	0.624	0.0315	0.0315	0.784	0.599	0.0315	0.0315	0.82	0.64	0.0315	0.0315	0.926	0.63	0.0315	0.0315	0.92
VYNYNhLMPTR-E4W6B6-H6zsw-TMT	1.381	0.0315	0.938	0.0315	1.472	0.0315	1.17	0.0315	1.47	0.0315	1.229	0.0315	1.467	0.0315	1.295	0.0315	1.323	0.0315	1.139	0.0315
YQShDYAFSSVEK-C9JGT6-H4zsw-TMT	1.032	0.0315	0.0315	0.828	1.561	0.0315	0.0315	1.477	1.556	0.0315	0.0315	1.458	1.123	0.0315	0.0315	1.027	1.386	0.0315	0.0315	1.392
YGDGGSTFQSTTGHcVH-P31943-C15zsw-TMT	1.182	0.88	0.0315	0.0315	1.38	1.351	0.0315	0.0315	1.403	1.189	0.0315	0.0315	1.068	0.85	0.0315	0.0315	1.233	1.206	0.0315	0.0315
DASIVGFFDDSFSEAhSEFL-P30101-H16zsw-TMT	0.789	1.117	0.0315	1.066	2.362	1.792	0.0315	1.511	1.854	1.53	0.0315	1.487	0.68	0.423	0.0315	0.579	1.587	0.888	0.0315	1.452
IQGEYMIPcEK-H7C469-C9zsw-TMT	1.065	1.167	0.0315	0.0315	0.939	0.922	0.0315	0.0315	1.027	1.017	0.0315	0.0315	1.029	0.903	0.0315	0.0315	1.033	1.037	0.0315	0.0315
AFQYVETHGEVcPANWTPDSPTIKPSPAASK-P30048-C12zsw-TMT	1.67	1.168	0.785	1.18	1.879	1.725	1.317	1.391	1.869	2.023	1.632	1.645	0.81	1.126	0.759	0.779	0.779	1.244	1.222	1.2
YLPPATQVVLISATLPhEILEMTNK-P38919-H17zsw-TMT	0.79	0.782	1.245	0.892	1.443	1.264	1.203	1.529	1.088	1.007	1.135	1.126	0.736	0.672	0.826	1.352	1.088	0.833	0.896	0.974
TLTAVhDAILEDLVFPSEIVGK-P62081-H6zsw-TMT	0.921	0.961	0.98	1.143	0.914	0.943	0.754	0.897	0.971	0.921	0.884	0.739	1.024	1.098	0.929	0.771	1.076	0.833	0.847	0.719
DDVcFFLSQSGETADTLMGLR-Q06210-C4zsw-TMT	0.906	0.799	0.81	1.107	1.158	0.912	0.823	1.176	0.811	0.669	0.666	0.725	1.292	1.02	0.87	0.766	1.598	1.06	0.895	1.133
hTDPVPDPR-P16615-H1zsw-TMT	1.005	0.902	0.886	0.0315	0.952	0.979	0.809	0.0315	0.948	1.138	0.905	0.0315	0.745	0.874	0.827	0.0315	0.743	0.829	0.892	0.0315
EGcEAIVDTGTSLMVGPVDEVR-A0A1B0GW44-C3zsw-TMT	0.0315	0.0315	1.035	1.056	0.0315	0.0315	1.067	1.049	0.0315	0.0315	1.136	1.093	0.0315	0.0315	1.124	1.054	0.0315	0.0315	0.808	0.955
GIEELFLDLcK-Q96GX3-C10zsw-TMT	1.316	1.185	1.017	0.776	1.008	0.926	0.994	0.856	0.644	0.722	0.717	0.649	1.169	1.023	0.824	0.911	1	1.06	1.097	1.077
hWPFQVINDGDKPK-A0A1U9X7W4-H1zsw-TMT	0.861	0.954	1.039	0.985	0.865	0.756	0.89	0.949	1.099	1.076	1.288	1.275	0.948	0.892	1.013	0.924	0.846	0.758	0.952	0.771
NTNDANScQIIIPQNQVNR-Q5SX91-C8zsw-TMT	1.106	0.729	0.0315	0.0315	0.998	0.939	0.0315	0.0315	1.345	1.204	0.0315	0.0315	1.233	0.931	0.0315	0.0315	1.172	0.951	0.0315	0.0315
GAhSVGLMWWMLAR-C9J9K3-H3zsw-TMT	1.322	0.924	0.989	1.181	1.063	1.103	1.039	1.049	1.214	1.185	1.061	1.156	1.172	1.171	0.985	0.908	0.941	0.892	0.92	0.952
DLPVTEAVFSALVTGhAR-P42704-H16zsw-TMT	1.116	0.92	0.0315	1.259	0.915	0.898	0.0315	1.241	0.962	0.79	0.0315	1.178	0.952	0.808	0.0315	1.045	0.932	0.913	0.0315	1.196
VTYLVhNFEEGGGVAMGMYNQDK-Q0QER2-H6zsw-TMT	1	0.669	0.0315	0.0315	1.035	0.677	0.0315	0.0315	1.542	1.048	0.0315	0.0315	1.202	0.761	0.0315	0.0315	1.355	1.288	0.0315	0.0315
GYEVIYLTEPVDEYcIQALPEFDGK-Q5CAQ5-C15zsw-TMT	0.901	1.084	1.152	0.997	1.432	1.109	1.385	1.386	1.123	0.853	0.77	0.87	1.219	1.149	0.645	1.145	1.346	1.272	1.316	1.237
NLhYFNSDSFAShPNYPYSDEY-A0A0A0MSS8-H3zsw-TMT H13zsw-TMT	0.0315	1.415	0.0315	1.604	0.0315	0.214	0.0315	0.297	0.0315	0.601	0.0315	1.071	0.0315	0.359	0.0315	0.483	0.0315	0.308	0.0315	1.134
hDDYLVMLK-Q5RLJ0-H1zsw-TMT	0.966	0.0315	0.957	0.0315	1.118	0.0315	0.878	0.0315	0.955	0.0315	0.817	0.0315	0.853	0.0315	0.878	0.0315	0.682	0.0315	0.774	0.0315
SGVYQHVTGEMMGGhAIR-B4DMY4-H15zsw-TMT	0.95	0.94	0.0315	0.0315	0.827	0.793	0.0315	0.0315	2.006	1.493	0.0315	0.0315	0.7	0.566	0.0315	0.0315	1.113	0.847	0.0315	0.0315
TVLSANADhMAQIEGLMDDVDFK-B7Z766-H9zsw-TMT	0.0315	0.959	0.0315	0.869	0.0315	1.14	0.0315	1.156	0.0315	1.29	0.0315	1.194	0.0315	1.178	0.0315	0.924	0.0315	1.09	0.0315	0.859
TALIhDGLAR-P25398-H5zsw-TMT	0.799	0.839	0.972	0.874	1.038	1.154	1.149	1.092	1.017	1.181	1.224	1.174	0.922	1.057	0.902	0.943	0.927	1.011	1.057	0.903
GLGTDEDSLIEIIcSR-P07355-C14zsw-TMT	0.966	1.012	0.975	1.039	0.336	0.474	0.296	0.383	0.302	0.273	0.235	0.318	0.493	0.535	0.403	0.508	0.841	0.987	0.876	0.931
NADMSEEMQQDSVEcATQALEK-F8VXI7-C15zsw-TMT	0.0315	1.247	0.843	0.0315	0.0315	1.119	0.785	0.0315	0.0315	1.101	0.667	0.0315	0.0315	1.125	0.745	0.0315	0.0315	1.326	0.692	0.0315
EEGFPIRPhYFWPLLVGR-P42704-H9zsw-TMT	0.883	0.0315	0.693	0.903	0.626	0.0315	0.888	0.762	1.05	0.0315	1.311	1.091	1.05	0.0315	0.852	0.934	0.862	0.0315	0.624	0.825
GFEVVYmTEPIDEYcVQQLK-P08238-M7Oxidation C15zsw-TMT	1.097	0.0315	0.931	0.605	1.049	0.0315	0.734	0.504	0.939	0.0315	0.504	0.207	1.245	0.0315	0.856	0.313	1.303	0.0315	1.179	0.0315
hVINFDLPSDIEEYVHR-A0A0D9SFB3-H1zsw-TMT	1.08	1.262	1.36	1.213	0.557	0.752	0.635	0.567	0.709	0.938	0.767	0.747	0.892	0.991	0.879	0.843	0.66	0.762	0.575	0.654
VTGEADVEFAThEDAVAAMSK-P31943-H12zsw-TMT	0.97	1.053	1.057	1.078	1.267	1.106	0.931	1.097	1.362	1.295	1.226	1.343	0.982	1.039	1.309	1.179	1.041	0.957	1.109	1.078
TcDISFSDPDDLLNFK-P61081-C2zsw-TMT	1.119	1.053	1.054	1.163	0.829	0.859	0.931	0.825	0.907	1.07	0.893	0.926	1.112	0.955	1.131	0.927	1.003	1.148	1.023	1.135
EILGTAQSVGcNVDGR-P30050-C11zsw-TMT	0.913	0.87	0.917	0.941	0.958	0.999	0.94	1.025	1.013	0.81	0.926	0.923	1.197	1.038	1.131	1.164	1.218	1.089	1.034	1.033
LIGGLAMAcHDSFLK-P31949-C9zsw-TMT	1.064	0.0315	0.0315	1.183	0.56	0.0315	0.0315	0.51	0.487	0.0315	0.0315	0.569	0.622	0.0315	0.0315	0.67	0.418	0.0315	0.0315	0.516
MFLGDNAhLSIINEYLSQSYQK-A4QPB0-H8zsw-TMT	0.0315	0.0315	1.129	1.18	0.0315	0.0315	0.861	0.683	0.0315	0.0315	0.642	0.663	0.0315	0.0315	1.209	0.77	0.0315	0.0315	0.75	0.732
KhLEINPDhSIIETLR-P07900-H2zsw-TMT H9zsw-TMT	1.024	1.134	0.833	0.0315	0.968	0.866	1.084	0.0315	1.097	1.496	1.12	0.0315	1.188	1.507	1.216	0.0315	0.869	1.114	0.951	0.0315
DLLNcSFK-P43490-C5zsw-TMT	0.0315	1.095	1.215	0.0315	0.0315	0.725	0.691	0.0315	0.0315	0.652	0.684	0.0315	0.0315	0.818	0.777	0.0315	0.0315	0.768	0.574	0.0315
EIADGLcLEVEGK-P13693-C7zsw-TMT	0.0315	0.692	0.916	0.72	0.0315	0.58	0.819	0.645	0.0315	0.665	0.905	0.609	0.0315	1.189	1.469	1.027	0.0315	1.643	1.316	0.756
MIEAVQNhIGSLNWGYR-E9PIR7-H8zsw-TMT	0.871	0.962	0.0315	0.774	0.499	0.595	0.0315	0.489	0.5	0.711	0.0315	0.581	0.735	0.961	0.0315	0.784	0.568	0.743	0.0315	0.675
LEPhEGLLLR-B4E2Z3-H4zsw-TMT	0.897	0.899	0.998	0.0315	0.802	0.771	0.867	0.0315	0.814	1.034	0.939	0.0315	0.845	0.994	1.14	0.0315	0.838	1.038	1.149	0.0315
hGVVPLATYMR-P46778-H1zsw-TMT	0.0315	0.0315	0.867	1.138	0.0315	0.0315	0.853	1.042	0.0315	0.0315	0.686	0.824	0.0315	0.0315	0.774	0.991	0.0315	0.0315	0.442	0.651
SLDLFNcEITNLEDYR-Q53F20-C7zsw-TMT	1.072	1.033	0.915	0.976	1.333	1.345	1.181	1.171	0.882	0.851	0.761	0.82	0.981	0.9	0.696	0.881	1.597	1.525	1.239	1.422
IMDPNIVGSEhYDVAR-P06576-H11zsw-TMT	0.833	0.873	0.849	0.876	1.424	1.563	2.821	2.836	1.611	1.889	3.104	2.856	0.794	1.005	0.984	0.506	0.93	1.066	1.232	1.423
GFTDADNTWEPEENLDcPELIEAFLNSQK-Q13185-C17zsw-TMT	1.136	0.721	0.963	1.056	2.042	1.906	1.927	1.916	1.003	0.781	0.767	1.016	1.163	0.998	0.718	0.771	1.82	2.528	1.571	1.828
SSEHINEGETAMLVcK-B4DY23-C15zsw-TMT	0.0315	0.954	0.0315	0.786	0.0315	1.341	0.0315	1.26	0.0315	1.392	0.0315	1.317	0.0315	1.325	0.0315	1.248	0.0315	1.527	0.0315	1.361
ELhSEFSEVMNEIWASDQIR-P40939-H3zsw-TMT	0.888	1.224	0.0315	0.511	1.079	1.173	0.0315	0.565	0.881	1.005	0.0315	0.437	1.061	1.075	0.0315	0.776	1.06	1.231	0.0315	0.796
STLTDSLVcK-P13639-C9zsw-TMT	1.043	1.121	1.198	1.221	0.844	0.748	0.776	0.852	0.948	0.764	0.759	0.837	0.965	0.87	0.943	1.064	0.885	0.815	0.913	0.979
SVGLDFSLPGMEhVYGIPEHADNLR-Q14697-H13zsw-TMT	0.0315	0.0315	1.293	1.126	0.0315	0.0315	1.148	0.761	0.0315	0.0315	0.876	0.845	0.0315	0.0315	0.923	1.021	0.0315	0.0315	0.956	1.031
hSQFLGYPITLY-P08238-H1zsw-TMT	0.0315	1.12	0.0315	1.229	0.0315	0.787	0.0315	1.021	0.0315	0.877	0.0315	1.094	0.0315	0.836	0.0315	1.057	0.0315	0.875	0.0315	1.088
IDNLMADGTcQDAAIVGYK-P07737-C10zsw-TMT	1.048	1.095	1.126	1.128	1.047	1.034	1.054	1.075	1.089	1.039	0.864	1.102	1.29	1.302	1.311	1.251	1.038	1.183	1.223	1.203
AIGAVPLIQGEYMIPcEK-H7C469-C16zsw-TMT	0.901	1.159	0.0315	0.0315	1.091	1.005	0.0315	0.0315	0.929	0.753	0.0315	0.0315	0.785	0.799	0.0315	0.0315	0.776	0.824	0.0315	0.0315
YKPVTNQVEcHPY-O60218-C10zsw-TMT	1.511	1.448	0.0315	1.621	0.623	0.997	0.0315	0.558	0.74	1.322	0.0315	0.843	0.588	0.815	0.0315	0.5	0.668	0.96	0.0315	0.693
DQLPADEcNK-B7Z4V2-C8zsw-TMT	1.224	0.754	0.935	0.836	1.537	1.319	1.284	1.36	1.72	1.44	1.602	1.604	1.468	1.202	1.171	1.114	1.502	1.193	1.302	1.435
EcADLWPR-Q9BTQ7-C2zsw-TMT	1.029	1.089	1.138	1.03	1.044	1.044	1.05	1.046	0.858	0.805	0.879	0.91	1.015	1.002	1.231	1.133	0.87	0.742	0.904	0.921
NcNDFQYESK-Q04917-C2zsw-TMT	0.0315	1.008	0.0315	1.054	0.0315	1.141	0.0315	1.243	0.0315	1.089	0.0315	1.2	0.0315	0.877	0.0315	1.021	0.0315	1.031	0.0315	1.155
GYSFGhPSSVAGEVVFNTGLGGYPEAITDPAYK-A8K134-H6zsw-TMT	0.0315	1.213	0.977	0.631	0.0315	1.006	0.817	0.705	0.0315	0.966	0.962	0.898	0.0315	1.585	1.159	0.978	0.0315	1.955	1.405	1.079
GhLENNPALEK-P05388-H2zsw-TMT	0.987	0.752	0.695	0.804	1.167	1.934	1.486	1.592	1.168	1.646	1.668	1.51	0.896	1.255	1.03	1.112	0.959	1.887	1.318	1.334
DGTVLcELINALYPEGQAPVK-X6RJP6-C6zsw-TMT	0.0315	2.053	1.178	1.123	0.0315	1.758	0.837	0.858	0.0315	0.731	0.545	0.643	0.0315	1.661	0.838	1.293	0.0315	2.095	1.459	1.081
SFANTLVDVcAYAGSGNVLK-Q13200-C10zsw-TMT	1.114	1.023	1.314	1.054	0.897	0.955	0.95	0.957	0.826	0.804	0.758	0.761	0.979	0.976	1.021	0.736	0.838	0.69	0.95	0.757
LEGDLTGPSVDVEVPDVELEcPDAK-Q09666-C21zsw-TMT	0.836	1.082	0.886	0.913	0.685	0.773	0.648	0.657	0.785	0.937	0.682	0.947	0.952	1.03	0.688	0.829	1.492	1.279	1.311	1.185
TAASGIPYhSEVPVSLK-D6W5C0-H9zsw-TMT	0.772	0.784	0.687	0.877	1.562	1.745	1.468	1.622	1.539	1.519	1.669	1.749	0.911	0.881	1.076	0.993	1.414	1.307	1.326	1.45
YQVSWSLDhK-P51571-H9zsw-TMT	0.929	0.835	0.974	1.006	1.019	0.969	1.039	0.869	0.888	0.794	0.899	0.884	0.804	0.725	0.822	0.993	0.722	0.63	0.865	0.713
VTEGLTDVILYhQPDDK-Q05CK9-H12zsw-TMT	0.953	1.134	0.834	0.0315	1.043	1.08	0.966	0.0315	1.101	1.191	0.961	0.0315	0.944	1.185	0.975	0.0315	1.052	1.005	0.966	0.0315
VIGIEcSSISDYAVK-E9PKG1-C6zsw-TMT	0.943	0.954	0.907	0.0315	1.092	1.1	1.001	0.0315	0.97	1.087	0.859	0.0315	0.898	1.173	0.93	0.0315	0.711	0.771	0.749	0.0315
TLMELLNQMDGFDTLhR-P62333-H16zsw-TMT	1.398	0.0315	1.032	0.0315	0.862	0.0315	0.914	0.0315	1.053	0.0315	0.954	0.0315	1.089	0.0315	1.036	0.0315	0.992	0.0315	1.152	0.0315
FhVEEEGK-P00558-H2zsw-TMT	0.873	0.0315	1.034	1.134	0.549	0.0315	0.557	0.482	0.615	0.0315	0.651	0.669	0.732	0.0315	0.745	0.871	0.797	0.0315	1.087	1.07
hVAEVLEYTK-P05198-H1zsw-TMT	0.0315	0.958	0.839	1.09	0.0315	1.684	1.195	1.363	0.0315	1.529	1.38	1.283	0.0315	1.454	1.261	1.416	0.0315	1.877	1.466	1.574
ELDQWIEQLNEcK-P67775-C12zsw-TMT	1.222	0.0315	1.095	1.18	0.758	0.0315	0.793	0.779	1.138	0.0315	1.136	1.326	1.064	0.0315	0.831	0.901	0.853	0.0315	0.93	0.975
FIQENIFGIcPH-P30101-C10zsw-TMT	1.077	1.04	1.006	1.136	1.175	1.137	1.187	1.247	1.024	0.955	1.074	1.037	1.075	0.87	1.075	0.996	1.016	0.909	1.035	1.055
DPVPGYSVPAAEhSTITAWGK-P43490-H13zsw-TMT	0.0315	0.96	1.212	0.0315	0.0315	0.667	0.773	0.0315	0.0315	0.714	1.16	0.0315	0.0315	0.573	0.692	0.0315	0.0315	0.616	0.707	0.0315
VIHLSNLPhSGYSDSAVLK-P43243-H9zsw-TMT	1.05	0.804	1.072	0.0315	1.116	1.12	1.245	0.0315	1.279	1.371	1.539	0.0315	0.921	1.101	1.258	0.0315	0.793	1.257	1.123	0.0315
GVLFYGPPGcGK-P55072-C10zsw-TMT	0.901	0.0315	1.058	0.799	0.899	0.0315	0.934	0.858	0.681	0.0315	0.875	0.589	0.565	0.0315	1.058	0.813	0.586	0.0315	0.88	0.53
hIYYITGETK-P07900-H1zsw-TMT	0.832	0.707	0.818	0.869	1.165	0.988	1.119	1.245	1.139	0.884	1.281	1.422	1.647	1.118	1.59	1.719	1.4	0.941	1.346	1.418
IFVGNVSAAcTSQELR-Q96PK6-C10zsw-TMT	1.032	0.957	1.118	0.0315	1.07	0.988	0.979	0.0315	1.22	1.196	1.195	0.0315	1.165	1.162	1.078	0.0315	1.102	1.021	1.194	0.0315
QLYhLGVVEAYSGLTK-Q08211-H4zsw-TMT	0.817	1.133	0.991	0.0315	1.201	1.104	0.924	0.0315	1.193	1.336	1.122	0.0315	0.959	1.175	0.887	0.0315	0.965	1.079	0.719	0.0315
DSLDPSFThAMQLLTAEIEK-B4E043-H9zsw-TMT	0.0315	0.0315	0.906	2.787	0.0315	0.0315	1.163	1.995	0.0315	0.0315	1.183	0.0315	0.0315	0.0315	0.812	0.0315	0.0315	0.0315	0.888	0.0315
ETVSEESNVLcLSK-P13639-C11zsw-TMT	1.04	0.828	0.914	0.811	0.895	0.843	0.966	0.967	0.927	0.943	0.956	0.938	1.009	1.074	0.972	1.1	0.699	0.915	0.971	1.019
SSGEIVYcGQVFEK-M0R0P7-C8zsw-TMT	0.0315	0.0315	0.838	1.141	0.0315	0.0315	0.955	0.966	0.0315	0.0315	0.889	0.885	0.0315	0.0315	1.059	1.086	0.0315	0.0315	0.794	0.876
VFIWTcDDASSNTWSPK-A8MXL6-C6zsw-TMT	0.0315	1.083	0.0315	1.109	0.0315	0.897	0.0315	0.813	0.0315	1.062	0.0315	1.125	0.0315	1.207	0.0315	1.148	0.0315	1.11	0.0315	1.078
YVAVMPPhIGDQPLTGAYTVTLDGR-P30043-H8zsw-TMT	0.848	0.855	0.631	0.0315	0.668	0.671	0.76	0.0315	0.914	0.67	0.725	0.0315	0.752	0.79	0.757	0.0315	1.237	1.2	0.981	0.0315
FhMVDGNVSGEFTDLVPEK-O95433-H2zsw-TMT	0.0315	0.839	0.988	0.0315	0.0315	0.796	1.014	0.0315	0.0315	1.144	1.262	0.0315	0.0315	1.098	1.336	0.0315	0.0315	1.183	1.172	0.0315
PTANVSVVDLTcR-P04406-C12zsw-TMT	0.576	0.629	0.0315	0.0315	0.489	0.417	0.0315	0.0315	0.592	0.551	0.0315	0.0315	0.43	0.45	0.0315	0.0315	0.406	0.416	0.0315	0.0315
SSILLDVKPWDDETDMAQLEAcVR-P29692-C22zsw-TMT	0.0315	0.0315	0.793	0.87	0.0315	0.0315	0.838	0.811	0.0315	0.0315	0.573	0.586	0.0315	0.0315	0.779	0.845	0.0315	0.0315	0.99	0.883
SLAGSSGPGASSGTSGDhGELVVR-P29692-H18zsw-TMT	0.0315	0.0315	0.668	0.585	0.0315	0.0315	0.914	1.141	0.0315	0.0315	0.942	1.003	0.0315	0.0315	0.879	1.134	0.0315	0.0315	1.381	1.279
QLSSSVTGLTNIEEENcQR-A4QPB0-C17zsw-TMT	0.0315	0.0315	0.772	1.089	0.0315	0.0315	0.745	0.907	0.0315	0.0315	0.765	0.897	0.0315	0.0315	1.35	1.662	0.0315	0.0315	1.07	1.517
GEETPVIVGSALcALEGR-P49411-C13zsw-TMT	0.866	0.911	0.822	0.831	1.047	0.975	1.001	0.829	0.984	0.928	0.895	0.883	0.892	0.997	0.835	0.635	0.761	0.804	0.845	0.627
YGDGGSTFQSTTGh-P31943-H14zsw-TMT	1.032	1.041	0.94	0.0315	1.538	1.416	1.27	0.0315	1.482	1.406	1.164	0.0315	1.068	1.291	1.038	0.0315	1.141	1.15	0.949	0.0315
DAVTYTEhA-P62805-H8zsw-TMT	0.921	0.879	0.88	0.902	1.418	1.519	1.411	1.413	1.709	1.665	1.557	1.51	0.91	0.888	0.99	0.938	1.066	1.079	1.223	1.086
DhASIQMNVAEVDK-Q8WVC2-H2zsw-TMT	0.944	0.862	0.918	0.849	1.138	1.406	0.967	1.417	1.628	2.13	1.183	1.179	0.963	1.022	1.039	1.271	0.965	1.249	1.045	1.09
FShEEIAmATVTALR-P04075-H3zsw-TMT M8Oxidation	0.893	0.961	0.0315	0.0315	1.056	0.957	0.0315	0.0315	0.956	1.038	0.0315	0.0315	1.317	1.516	0.0315	0.0315	1.126	1.163	0.0315	0.0315
VELAQLQEEWNEhNAK-A8K964-H13zsw-TMT	0.885	0.997	0.0315	0.0315	1.372	1.261	0.0315	0.0315	1.472	1.282	0.0315	0.0315	1.113	0.781	0.0315	0.0315	1.269	0.859	0.0315	0.0315
WLScETQLPVSFR-O75643-C4zsw-TMT	1.264	1.156	1.116	1.024	0.924	0.889	0.926	0.907	1.212	1.223	1.128	1.513	0.942	1.008	0.924	0.916	0.863	0.802	0.855	1.017
GEVPcTVTSASPLEEATLSELK-P48047-C5zsw-TMT	1.1	0.911	0.0315	0.0315	0.834	0.966	0.0315	0.0315	1.046	1.028	0.0315	0.0315	0.993	0.952	0.0315	0.0315	1.027	1.074	0.0315	0.0315
ATIAGGGVIPhIHK-P0C0S5-H11zsw-TMT	0.781	0.621	0.824	0.681	1.051	0.917	1.269	1.022	0.891	0.787	0.845	0.739	0.97	0.831	1.037	0.955	0.845	0.899	1.091	0.742
SYIEGYVPSQADVAVFEAVSSPPPADLcHALR-P24534-C28zsw-TMT	1.326	1.159	0.821	1.669	1.331	1.163	0.783	1.053	0.709	0.81	0.514	0.299	1.143	0.951	0.608	0.0315	1.205	1.248	1.224	0.0315
SLLEGQEDhYNNLSASK-P08727-H9zsw-TMT	0.726	0.657	0.722	0.577	1.453	1.173	1.712	1.247	1.129	0.674	1.055	0.763	0.704	0.549	0.539	0.592	0.744	0.693	0.851	0.76
hYGGLTGLNK-P18669-H1zsw-TMT	0.855	1.025	1.035	0.898	1.094	1.166	1.052	0.912	0.976	1.324	1.232	0.781	1.053	1.344	1.183	1.02	1.251	1.683	1.549	1.026
QVEDLQATFSSIhSFQDLSSSILAQSR-K7ERZ3-H13zsw-TMT	0.0315	0.781	0.703	1.09	0.0315	0.801	0.742	1.196	0.0315	0.769	0.956	0.793	0.0315	0.917	0.831	0.839	0.0315	0.828	0.618	1.138
FGhEFLEFEFRPDGK-F5H6N1-H3zsw-TMT	0.0315	1.197	1.005	0.0315	0.0315	1	1.004	0.0315	0.0315	1.046	1.043	0.0315	0.0315	1.122	1.241	0.0315	0.0315	1.128	0.943	0.0315
VTDDLVcLVYK-P49458-C7zsw-TMT	0.869	1.029	1.01	0.947	1.15	1.164	1.172	1.268	0.782	0.91	0.917	0.974	1.042	1.024	0.923	0.959	0.845	0.911	0.997	0.977
GAVVGIDLGTTNScVAVMEGK-B7Z4V2-C14zsw-TMT	1.028	1.161	0.98	0.792	0.932	0.885	0.762	0.744	1.016	0.886	0.753	0.822	1.062	1.089	0.843	0.835	0.958	0.922	0.782	0.809
ELFSPLhALNFGIGGDTTR-P68402-H7zsw-TMT	1.133	1.055	1.352	1.239	0.862	0.67	0.753	0.866	0.946	0.808	0.935	1.009	1.133	1.066	1.149	1.126	1.055	0.897	0.969	0.943
YQILPLhSQIPR-Q08211-H7zsw-TMT	0.869	0.0315	1.046	0.869	0.887	0.0315	1.1	1.137	0.903	0.0315	1.01	1.229	0.81	0.0315	1.019	1.048	0.799	0.0315	1.071	1.037
LVLEVAQhLGESTVR-P06576-H8zsw-TMT	0.763	0.825	0.643	0.776	1.21	0.85	0.931	1.004	1.23	0.842	0.985	0.844	0.916	0.714	0.86	0.764	0.86	0.649	0.963	0.72
EANFTVSSMhGDMPQK-P38919-H10zsw-TMT	0.83	0.0315	1.026	0.0315	1.262	0.0315	1.469	0.0315	2.228	0.0315	2.427	0.0315	0.817	0.0315	1.093	0.0315	1.178	0.0315	1.219	0.0315
TLVSSSADPEGhFETPIWIER-Q14697-H12zsw-TMT	1.102	0.981	1.208	1.079	1.305	0.991	1.335	1.28	1.22	0.889	1.049	1.048	1.679	0.865	1.295	1.059	1.08	0.907	1.01	1.134
TQIDhYVGIAR-B7Z361-H5zsw-TMT	0.763	0.808	0.809	0.715	1.751	1.714	1.686	1.72	1.008	1.101	0.965	0.965	1.006	0.802	1.074	0.949	1.066	1.006	1.035	1.136
VIhDNFGIVEGLmTTVHAITATQK-P04406-H3zsw-TMT M13Oxidation	1.273	1.048	1.391	1.321	0.914	0.853	0.767	0.722	0.811	0.917	0.827	0.896	1.144	1.097	0.987	0.955	0.897	0.812	0.788	0.669
IFPVLcK-P14618-C6zsw-TMT	1.115	1.072	0.0315	0.0315	0.799	0.705	0.0315	0.0315	0.712	0.601	0.0315	0.0315	0.798	0.79	0.0315	0.0315	0.648	0.692	0.0315	0.0315
YShLQPGDHLTDITLK-Q15046-H3zsw-TMT	0.0315	1.058	1.111	0.0315	0.0315	1.151	1.272	0.0315	0.0315	1.536	1.398	0.0315	0.0315	1.139	1.144	0.0315	0.0315	1.276	1.201	0.0315
YTPSGQAGAAASESLFVSNhAY-P04075-H20zsw-TMT	0.941	1.16	1.097	0.941	0.735	0.935	0.816	0.621	0.875	0.855	0.71	0.804	0.977	0.963	0.959	1.162	1.395	1.722	1.222	1.305
NNTQVLINcR-K7ERG4-C9zsw-TMT	0.876	1.05	1.173	0.0315	0.941	0.916	0.976	0.0315	0.711	0.831	0.782	0.0315	0.823	0.803	1.085	0.0315	0.787	0.804	0.904	0.0315
VIQcFAETGQVQK-Q00610-C4zsw-TMT	0.96	0.91	0.904	0.0315	1.089	0.97	0.981	0.0315	0.958	0.943	0.96	0.0315	0.794	0.815	0.913	0.0315	0.908	0.688	0.858	0.0315
YWLcAATGPSIK-P63244-C4zsw-TMT	0.977	1.161	1.047	0.977	0.977	0.879	0.726	0.746	0.864	0.93	0.843	0.798	1.031	1.035	1.001	1.043	0.754	0.869	0.789	0.7
KENQWcEEK-E5RJR5-C6zsw-TMT	0.848	0.961	0.852	0.896	1.344	1.397	1.303	1.436	0.998	1.157	1.118	1.003	0.932	0.889	1.003	1.134	0.801	1.011	1.226	1.284
ILDWhVANTDK-P37837-H5zsw-TMT	0.877	1.096	0.949	0.912	0.89	0.987	1.042	0.734	0.743	0.945	1.042	0.729	0.543	0.613	0.881	0.651	0.837	1.22	1.155	0.946
SSNPIIVScGWDK-P63244-C9zsw-TMT	0.872	1.075	0.895	0.945	0.805	0.971	0.814	0.884	0.929	1.3	0.997	1.085	0.915	1.097	0.981	1.071	0.589	0.834	0.782	0.821
IQQESGcK-B4E0X8-C7zsw-TMT	0.943	0.872	0.912	0.0315	1.096	1.046	0.972	0.0315	1.012	0.94	0.949	0.0315	0.918	0.944	1.12	0.0315	1.065	1.181	1.264	0.0315
HSDGNLcVK-P49458-C7zsw-TMT	0.0315	0.674	0.827	1.09	0.0315	0.897	1.168	1.013	0.0315	0.593	0.826	0.672	0.0315	0.534	0.916	0.989	0.0315	0.36	0.848	1.001
AEPPQcTSLAWSADGQTLFAGYTDNLVR-P63244-C6zsw-TMT	1.284	0.922	1.36	1.137	0.883	0.661	1.242	0.872	0.683	0.492	1	0.693	0.987	0.72	0.833	0.703	1.042	0.753	1.422	0.909
SSSSVTTSETQPcTPSSSDYSDLQR-K7EM16-C13zsw-TMT	0.0315	1.539	0.0315	1.238	0.0315	0.779	0.0315	0.588	0.0315	0.737	0.0315	0.429	0.0315	0.619	0.0315	0.52	0.0315	1.114	0.0315	0.841
HDDSSDNFcEADDIQSPEAEYVDLLLNPER-Q96HE7-C9zsw-TMT	0.662	0.911	0.0315	1.095	1.796	1.574	0.0315	1.575	0.964	0.748	0.0315	0.935	0.424	0.655	0.0315	0.879	1.003	1.395	0.0315	1.848
VVSQYhELVVQAR-B4DQY2-H6zsw-TMT	0.0315	0.0315	0.904	0.8	0.0315	0.0315	1.054	1.234	0.0315	0.0315	1.335	1.78	0.0315	0.0315	1.114	0.974	0.0315	0.0315	1.21	1.172
VTEGLVDVILYhQPDDK-Q0VGD6-H12zsw-TMT	0.981	1.025	1.031	0.0315	0.903	0.946	0.901	0.0315	0.89	1.049	0.798	0.0315	1	1.064	0.911	0.0315	1.099	0.902	0.967	0.0315
TTQIPQWcVEYMR-B4E0S6-C8zsw-TMT	1.157	1.274	0.0315	1.158	1.123	0.939	0.0315	1.08	1.023	1.06	0.0315	1.211	1.047	1.387	0.0315	1.412	0.993	1.076	0.0315	1.126
LQQVLQMEShIQSTSDR-B2RBR9-H10zsw-TMT	1.004	0.957	1.087	0.947	1.252	1.195	1.349	1.182	0.985	1.049	1.184	0.998	1.05	1.147	1.226	1.155	1.223	1.152	1.305	1.072
IcDDELILIK-P17987-C2zsw-TMT	0.0315	0.986	0.935	0.975	0.0315	0.867	0.94	0.956	0.0315	0.811	0.834	0.818	0.0315	0.884	1.153	0.992	0.0315	0.861	0.881	0.852
SQETEcTYF-Q75MT9-C6zsw-TMT	1.307	1.196	0.0315	0.0315	0.991	0.974	0.0315	0.0315	0.905	0.83	0.0315	0.0315	0.993	1.033	0.0315	0.0315	0.88	0.819	0.0315	0.0315
DLPVTEAVFSALVTGh-P42704-H16zsw-TMT	0.887	1.242	0.969	0.943	1.426	1.148	1.268	1.14	1.067	1.122	0.964	0.752	0.893	0.81	1.217	0.989	0.987	1.158	1.194	0.953
TLGEcGFTSQTAR-B8ZZU8-C5zsw-TMT	0.752	0.814	0.776	0.89	0.875	0.945	0.884	0.801	1.047	0.975	1.015	0.968	0.827	0.811	0.795	0.85	0.925	0.851	0.766	0.812
VNPcIGGVILFHETLYQK-P04075-C4zsw-TMT	1.287	1.311	1.286	1.237	0.713	0.612	0.719	0.666	0.725	0.76	0.755	0.74	0.848	0.838	0.906	0.8	0.709	0.874	0.779	0.784
TSGNVEDDLIIFPDDcEFK-Q68E00-C16zsw-TMT	0.96	0.901	0.843	0.0315	0.996	1.216	1.196	0.0315	1.228	0.916	1.408	0.0315	1.161	0.917	1.245	0.0315	1.375	1.309	0.844	0.0315
LSEDcLYLNIYTPADLTK-P23141-C5zsw-TMT	0.886	0.892	0.934	0.948	0.356	0.354	0.525	0.62	0.556	0.474	0.605	0.533	0.427	0.382	0.65	0.614	0.41	0.383	0.592	0.627
LTDQLPLIIVcDR-Q00610-C11zsw-TMT	1.103	1.212	1.141	1.139	0.829	0.918	0.816	0.825	1.023	0.952	1.004	0.992	0.991	1.058	1.058	0.872	0.82	0.903	0.848	0.908
DLDANGDAQVDFSEFIVFVAAITSAChK-P25815-H27zsw-TMT	0.0315	1.808	0.0315	0.0315	0.0315	3.457	2.326	0.0315	0.0315	1.505	1.24	0.0315	0.0315	1.434	0.0315	0.0315	0.0315	1.472	0.0315	0.0315
TYADYESVNEcMEGVcK-G3V279-C11zsw-TMT C16zsw-TMT	0.0315	1.237	1.237	0.875	0.0315	1.11	0.936	1.257	0.0315	1.147	1.177	1.433	0.0315	1.088	1.207	1.061	0.0315	1.033	0.958	1.201
TFShELSDFGLESTAGEIPVVAI-P30101-H4zsw-TMT	0.713	0.533	0.845	0.687	1.42	1.154	1.067	1.264	0.603	0.528	0.549	0.553	0.609	0.419	0.502	0.41	0.679	0.608	0.669	0.605
NAPLEVTEENFFEIcDELGVK-Q6NTA2-C15zsw-TMT	0.0315	0.996	0.839	0.0315	0.0315	1.682	2.27	0.0315	0.0315	0.801	0.859	0.0315	0.0315	0.885	0.805	0.0315	0.0315	1.099	1.573	0.0315
NGNPNGEGLPhWPEYNQK-P23141-H11zsw-TMT	0.0315	1.236	0.0315	0.919	0.0315	0.843	0.0315	0.856	0.0315	1.327	0.0315	1.199	0.0315	0.843	0.0315	0.82	0.0315	0.871	0.0315	0.874
ELDLSNNcLGDAGILQLVESVR-A0A024RC87-C8zsw-TMT	1.078	2.14	0.0315	1.244	1.148	1.456	0.0315	0.893	0.569	0.852	0.0315	0.707	0.746	0.801	0.0315	0.738	1.294	1.104	0.0315	1.279
McNEFFEGFPDK-P26447-C2zsw-TMT	1.034	1.036	1.175	1.107	0.453	0.427	0.565	0.456	0.491	0.527	0.483	0.475	0.524	0.568	0.607	0.609	0.515	0.683	0.665	0.627
EGILSDEIYcPPETAVLLGSYAVQAK-P15311-C10zsw-TMT	0.92	0.0315	0.0315	1.106	0.92	0.0315	0.0315	0.874	0.661	0.0315	0.0315	0.622	0.737	0.0315	0.0315	0.817	0.89	0.0315	0.0315	1.073
EGVVEcSFVK-Q75MT9-C6zsw-TMT	1.046	1.18	1.174	0.0315	1.303	1.463	1.223	0.0315	1.288	1.227	0.97	0.0315	1.078	1.041	0.811	0.0315	1.139	1.216	0.61	0.0315
LNFShGThEYHAETIK-P14618-H5zsw-TMT H8zsw-TMT	1.074	1.139	1.055	1.003	0.614	0.488	0.547	0.655	0.796	0.639	0.603	0.639	0.796	0.888	0.964	0.922	1.036	0.941	0.885	0.897
DVAWAPSIGLPTSTIAScSQDGR-A8MXL6-C18zsw-TMT	1.029	1.105	1.058	0.841	0.853	0.882	0.863	0.669	0.857	0.99	0.985	0.901	0.838	1.035	0.763	0.815	0.931	1.097	0.864	0.941
MLQPcGPPADKPEEN-Q9BWJ5-C5zsw-TMT	1.065	0.914	1.027	0.883	1.447	1.28	1.359	1.104	1.474	1.436	1.614	1.336	1.143	0.977	1.248	1.023	1.2	1.156	1.231	1.261
GYIWNYGAIPQTWEDPGhNDK-Q15181-H18zsw-TMT	1.029	1.208	1.06	0.0315	1.34	1.053	1.098	0.0315	1.241	1.283	1.063	0.0315	1.62	1.192	1.232	0.0315	1.627	1.485	1.739	0.0315
PEALFQPSFLGMEScGIHETTFNSIMK-Q8WVW5-C15zsw-TMT	0.697	0.0315	0.605	0.605	0.574	0.0315	0.463	0.46	0.54	0.0315	0.727	0.744	0.425	0.0315	0.397	0.452	0.354	0.0315	0.458	0.516
IFINNEWhDSVSGK-P00352-H8zsw-TMT	1.078	0.0315	1.097	0.966	0.906	0.0315	0.805	0.856	0.844	0.0315	0.815	0.795	0.764	0.0315	0.738	0.713	0.874	0.0315	0.874	0.749
KhSQFIGYPITLYLEK-P08238-H2zsw-TMT	1.083	0.847	1.137	1.164	0.862	0.872	0.86	0.855	1.06	0.895	1.1	0.997	1.243	1.198	1.297	1.192	0.764	0.73	0.844	0.766
VFhAGFGVVLGEDK-P54136-H3zsw-TMT	0.0315	0.964	0.0315	1.13	0.0315	0.959	0.0315	1.179	0.0315	1.108	0.0315	0.974	0.0315	1.171	0.0315	1.065	0.0315	0.803	0.0315	0.979
EIGLWFHPEELVDYTScAQN-P15531-C17zsw-TMT	0.0315	2.003	1.136	0.0315	0.0315	1.368	0.92	0.0315	0.0315	1.03	0.839	0.0315	0.0315	1.815	1.49	0.0315	0.0315	1.842	1.358	0.0315
VhLVGIDIFTGK-P63241-H2zsw-TMT	0.955	0.909	0.0315	0.964	0.898	0.806	0.0315	0.964	0.97	0.955	0.0315	1.036	1.463	1.435	0.0315	1.566	0.963	0.9	0.0315	1.176
ALEhFTDLYDIK-Q00610-H4zsw-TMT	0.755	0.918	0.747	0.0315	1.322	1.149	1.022	0.0315	0.721	1.427	0.823	0.0315	0.885	1.071	0.813	0.0315	0.839	1.31	0.697	0.0315
QFVVFEGNhYFYSPYPTK-P04843-H9zsw-TMT	1.003	0.0315	0.0315	0.844	1.01	0.0315	0.0315	0.965	0.87	0.0315	0.0315	1.067	1.033	0.0315	0.0315	0.786	0.931	0.0315	0.0315	0.854
GQELcADYSENTFTEYK-P02774-C5zsw-TMT	1.188	1.166	0.0315	0.0315	1.684	1.941	0.0315	0.0315	1.27	1.048	0.0315	0.0315	1.117	0.821	0.0315	0.0315	0.934	0.87	0.0315	0.0315
IYGFYDEcK-Q9UPN1-C8zsw-TMT	0.0315	1.129	1.095	1.183	0.0315	0.799	0.958	0.911	0.0315	0.712	0.836	0.822	0.0315	0.835	1.107	1.016	0.0315	0.712	1.007	0.845
GTDIMYTGTLDcWR-P05141-C12zsw-TMT	0.892	0.897	1.091	0.961	0.647	0.515	0.662	0.595	0.641	0.609	0.725	0.638	0.731	0.732	0.776	0.755	0.619	0.485	0.623	0.6
NELMYQLEQDhDLQAILQER-Q08211-H11zsw-TMT	1.198	1.144	1.013	1.143	1.234	1.113	1.079	1.097	1.104	1.031	1.022	1.042	1.201	1.247	1.053	0.926	1.206	1.029	0.885	0.843
ScSGVEFSTSGSSNTDTGK-A0A0A0MR02-C2zsw-TMT	1.028	0.785	0.0315	0.883	1.618	1.4	0.0315	1.2	1.311	0.965	0.0315	1.05	1.074	0.807	0.0315	1.021	1.162	1.06	0.0315	1.128
SMAASGNLGhTPFVDEL-P22695-H10zsw-TMT	0.0315	0.802	0.0315	0.957	0.0315	0.654	0.0315	0.738	0.0315	0.909	0.0315	1.006	0.0315	0.784	0.0315	0.795	0.0315	0.804	0.0315	0.844
LTIhGDLYYEGK-Q13435-H4zsw-TMT	0.0315	0.821	0.959	0.0315	0.0315	1.018	1.528	0.0315	0.0315	1.179	1.184	0.0315	0.0315	0.873	0.764	0.0315	0.0315	1.082	1.457	0.0315
EVWYFGLhYVDNK-E7EQR4-H8zsw-TMT	0.0315	0.892	1.149	0.0315	0.0315	0.779	0.95	0.0315	0.0315	1.156	0.859	0.0315	0.0315	0.878	1.271	0.0315	0.0315	0.83	1.07	0.0315
LQhGSILGFPK-B4DMF5-H3zsw-TMT	0.957	0.864	0.961	0.808	1.176	1.42	1.281	1.274	1.485	1.445	1.269	1.351	0.918	0.727	0.911	0.923	0.978	0.801	0.972	0.831
MTEEEVEMLVAGHEDSNGcINYEELVR-G8JLA2-C19zsw-TMT	0.0315	0.725	0.0315	1.101	0.0315	0.938	0.0315	0.867	0.0315	1.012	0.0315	0.967	0.0315	0.902	0.0315	1.011	0.0315	0.989	0.0315	1.146
HGSYEDAVhSGALND-P17987-H9zsw-TMT	0.0315	0.923	0.935	0.801	0.0315	1.372	1.327	1.173	0.0315	1.51	1.458	1.344	0.0315	1.233	1.362	1.179	0.0315	1.292	1.201	1.307
GFEVVYMTEPIDEYcVQQLK-P08238-C15zsw-TMT	0.952	1.123	1.093	1.054	0.833	0.951	0.8	0.826	0.699	0.741	0.746	0.823	1.395	1.388	1.107	1.291	0.891	0.915	0.947	0.821
NIcFTVWDVGGQDR-C9JPM4-C3zsw-TMT	0.0315	1.043	1.108	1.038	0.0315	0.855	0.864	0.695	0.0315	0.931	1.005	0.949	0.0315	1.012	0.842	0.89	0.0315	0.705	0.745	0.707
FhTVSGSK-D6R9P3-H2zsw-TMT	0.659	0.0315	0.706	0.874	1.056	0.0315	0.98	1.306	1.557	0.0315	1.274	1.373	0.989	0.0315	0.94	1.125	1.227	0.0315	0.768	1.145
NFYQEhPDLAR-B4DN41-H6zsw-TMT	0.854	0.856	0.949	0.935	1.13	1.155	0.963	1.327	1.438	1.467	1.324	1.52	1.032	1.038	1.022	1.349	1.032	0.873	0.976	1.151
AGEGTYALDSEScMEK-B3KXD6-C13zsw-TMT	0.957	0.792	0.0315	0.815	1.147	1.377	0.0315	1.316	0.878	0.762	0.0315	0.912	0.734	0.733	0.0315	0.761	0.944	0.721	0.0315	0.887
TDDYLDQPcYETINR-Q5SX91-C9zsw-TMT	1.118	1.203	0.0315	0.0315	0.89	0.816	0.0315	0.0315	0.964	1.036	0.0315	0.0315	1.277	1.195	0.0315	0.0315	0.914	0.818	0.0315	0.0315
FcTGLTQIETLFK-P12277-C2zsw-TMT	1.264	0.995	1.005	1.269	0.987	0.741	0.84	1.09	0.909	0.928	0.898	1.177	1.844	1.484	1.254	1.829	0.86	0.966	0.786	0.877
hPHDIIDDINSGAVEcPAS-P30050-H1zsw-TMT C16zsw-TMT	0.0315	1.066	1.14	0.0315	0.0315	0.937	1.015	0.0315	0.0315	1.069	0.894	0.0315	0.0315	1.626	1.193	0.0315	0.0315	1.198	0.957	0.0315
ALLLLcGEDD-P08758-C6zsw-TMT	1.032	1.07	1.03	1.3	0.782	0.766	0.837	0.838	0.794	0.613	0.56	0.74	0.687	0.634	0.711	0.953	0.91	0.933	0.84	1.142
VYADGSIcLDILQNR-Q8WXB3-C8zsw-TMT	1.009	0.948	0.0315	0.0315	0.831	0.853	0.0315	0.0315	0.792	0.796	0.0315	0.0315	1.192	1.018	0.0315	0.0315	1.041	0.891	0.0315	0.0315
hELQANcYEEVK-G3V1A4-H1zsw-TMT C7zsw-TMT	0.893	0.895	0.0315	0.0315	0.94	0.76	0.0315	0.0315	0.583	0.579	0.0315	0.0315	0.91	0.752	0.0315	0.0315	0.894	0.764	0.0315	0.0315
ILTEAEIDAhLVALAERD-P60900-H10zsw-TMT	1.102	1.271	0.922	0.0315	0.807	0.851	0.816	0.0315	0.92	0.92	0.779	0.0315	1.14	1.435	0.991	0.0315	1.196	0.947	0.814	0.0315
VShVSTGGGASLELLEGK-P00558-H3zsw-TMT	0.92	0.972	1.044	1.121	0.968	0.799	0.849	1.015	1.087	0.879	0.788	0.924	0.848	0.869	1.016	0.913	1.219	0.928	1.203	1.093
AVTEQGhELSNEER-P31946-H7zsw-TMT	0.0315	0.692	0.689	0.936	0.0315	1.184	0.938	1.301	0.0315	1.223	1.189	1.208	0.0315	0.84	1.028	0.92	0.0315	0.987	1.232	1.436
NAGNcLSPAVIVGLLK-A0A286YF22-C5zsw-TMT	1.157	1.17	1.291	1.236	1.027	1.103	1.065	1.051	0.969	0.969	1.035	1.069	1.108	1.249	1.374	1.408	1.296	1.177	1.368	1.232
ASVGFGGScFQK-O60701-C9zsw-TMT	0.0315	0.0315	1.072	1.106	0.0315	0.0315	0.758	0.815	0.0315	0.0315	0.949	0.912	0.0315	0.0315	0.747	0.874	0.0315	0.0315	0.756	0.654
IGDEYFTFITDcK-B3KX11-C12zsw-TMT	1.243	1.11	1.08	1.156	0.754	0.803	0.685	0.589	0.544	0.748	0.754	0.705	1.084	1.203	0.931	0.955	0.768	1.033	0.835	0.774
NINDAWVcTNDMFR-P61970-C8zsw-TMT	1.064	0.928	1.247	1.244	0.83	0.816	0.923	0.96	1.075	0.784	1.034	0.943	1.151	0.98	1.206	1.206	0.9	0.852	0.949	0.947
ASNGDAWVEAhGK-B7Z4V2-H11zsw-TMT	0.937	0.884	0.948	0.832	1.238	1.207	1.31	1.508	1.33	1.266	1.251	1.478	1.082	1.052	1.233	1.26	1.097	0.956	1.095	1.157
TTGIVMDSGDGVTHTVPIYEGYALPhAILR-Q8WVW5-H26zsw-TMT	0.0315	0.0315	0.962	1.1	0.0315	0.0315	1.004	1.059	0.0315	0.0315	0.419	0.652	0.0315	0.0315	1.004	1.035	0.0315	0.0315	0.838	0.958
KHLEINPDhPIVETLR-P08238-H9zsw-TMT	0.9	0.0315	1.043	0.0315	0.972	0.0315	1.162	0.0315	1.78	0.0315	1.72	0.0315	1.121	0.0315	1.005	0.0315	0.764	0.0315	1.05	0.0315
KFDVNTSAVQVLIEhIGNLDR-Q00610-H15zsw-TMT	1.124	0.0315	1.141	0.902	1.032	0.0315	1.015	0.895	1.027	0.0315	0.935	0.821	0.988	0.0315	1.077	0.811	0.987	0.0315	0.823	0.619
YKPAVNQIEcHPYLTQEK-P15121-C10zsw-TMT	1.277	1.178	0.0315	1.13	0.662	0.586	0.0315	0.683	0.725	0.707	0.0315	0.631	0.65	0.629	0.0315	0.673	1.067	1.199	0.0315	0.954
DQVTAQEIFQDNhEDGPTAK-P13010-H13zsw-TMT	0.736	1.562	0.761	0.854	1.997	2.069	2.182	2.47	2.233	2.252	1.82	1.991	1.274	1.76	1.356	1.745	1.681	1.853	1.891	1.651
LASTLVhLGEYQAAVDGAR-Q00610-H7zsw-TMT	0.91	0.873	0.928	1.028	0.957	1.057	1.242	1.239	1.247	1.044	1.149	1.351	1.024	1.116	1.272	1.163	1.458	1.029	1.235	1.176
TGTITTFEHAhNMR-P13639-H11zsw-TMT	0.995	0.874	1.077	0.878	1.415	1.008	1.163	1.092	1.293	0.973	1.123	1.113	1.17	1.321	1.339	1.155	1.117	1.018	1.13	1.031
EAEETQSTLQAEcDQYR-A7BI36-C13zsw-TMT	0.0315	0.741	1.049	0.0315	0.0315	1.502	1.595	0.0315	0.0315	1.461	1.729	0.0315	0.0315	0.856	1.2	0.0315	0.0315	1.013	1.295	0.0315
EQIVVDLShPGVSEDDQVSR-O60701-H9zsw-TMT	0.99	1.076	0.951	0.908	0.749	0.813	0.751	0.791	0.868	0.954	0.981	0.975	0.479	0.596	0.612	0.616	0.508	0.665	0.655	0.642
hYGPGWVSMANAGK-V9HWC6-H1zsw-TMT	0.865	0.866	0.849	1.024	0.98	1.058	1.022	1.124	0.922	0.875	0.955	1.006	0.96	0.936	1.073	1.064	0.772	0.84	0.843	1.007
TGDFQLhTNVNDGTEFGGSIYQK-A0A0A0MR02-H7zsw-TMT	0.982	1.073	0.0315	0.655	1.353	1.414	0.0315	1.528	1.873	1.498	0.0315	1.207	0.879	0.968	0.0315	1.078	1.76	1.613	0.0315	1.385
LAELEEFINGPNNAhIQQVGDR-Q00610-H15zsw-TMT	0.852	0.0315	0.781	0.917	0.947	0.0315	1.014	1.238	1.161	0.0315	1.333	1.475	0.809	0.0315	1.061	1.099	1.117	0.0315	1.189	1.129
NVDLLSDMVQEhDEPILK-F8VY35-H12zsw-TMT	1.176	1.073	0.933	0.999	0.908	0.686	0.898	0.926	0.877	0.717	1.062	0.975	1.07	0.838	0.913	0.941	1.2	0.824	1.205	1.018
DEEVhAGLGELLR-P50454-H5zsw-TMT	0.774	0.874	0.696	0.817	1.359	1.343	1.172	1.161	1.269	1.196	1.22	1.18	0.889	0.975	0.946	0.987	0.991	1.069	0.89	0.895
hTDNVIQWLNAMDEIGLPK-A0A0J9YXZ5-H1zsw-TMT	1.085	0.999	0.0315	0.0315	0.892	1.032	0.0315	0.0315	0.864	0.838	0.0315	0.0315	1.242	1.135	0.0315	0.0315	1.197	1.127	0.0315	0.0315
NLDcPELISEFMK-P45973-C4zsw-TMT	0.866	0.0315	0.0315	1.059	1.064	0.0315	0.0315	1.172	0.814	0.0315	0.0315	0.894	0.999	0.0315	0.0315	0.998	0.962	0.0315	0.0315	1.001
YPIEhGIVTNWDDMEK-Q8WVW5-H5zsw-TMT	0.874	0.0315	0.0315	1.12	1.945	0.0315	0.0315	2.011	1.15	0.0315	0.0315	1.236	1.357	0.0315	0.0315	1.716	1.294	0.0315	0.0315	1.335
VShLLGINVTDFTR-P35579-H3zsw-TMT	0.788	1.023	0.893	0.862	0.65	0.749	0.709	0.881	0.682	0.735	0.697	0.775	0.898	0.976	0.83	0.949	0.557	0.797	0.603	0.727
DLLLTSSYLSDSGSTGEhTK-B4E2Z3-H18zsw-TMT	1.062	0.95	0.947	0.948	1.013	0.99	0.951	1.195	1.339	1.435	1.218	1.509	1.187	1.162	1.082	1.4	1.89	1.647	1.266	1.609
YDDMAAcMK-P63104-C7zsw-TMT	0.769	0.915	0.918	1	0.756	0.808	0.81	0.822	0.536	0.706	0.646	0.74	0.735	0.921	0.848	0.884	0.629	0.898	0.88	1.052
EEFASTcPDDEEIELAYEQVAK-A0A1U9X8Y4-C7zsw-TMT	0.0315	1.104	0.703	1.091	0.0315	1.443	1	1.278	0.0315	0.904	0.491	0.786	0.0315	0.968	0.615	0.814	0.0315	1.223	0.452	1.186
LVILANNcPALR-P62888-C8zsw-TMT	1.09	0.98	1.045	0.0315	0.925	0.863	0.905	0.0315	0.947	0.834	0.946	0.0315	1.061	1.03	1.117	0.0315	1.018	0.779	1.021	0.0315
MTNGFSGADLTEIcQR-P55072-C14zsw-TMT	0.0315	1.062	0.0315	1.127	0.0315	0.986	0.0315	1.034	0.0315	0.955	0.0315	0.843	0.0315	0.9	0.0315	1.02	0.0315	0.916	0.0315	0.902
ENVIMSQILPcIK-B4DQY1-C11zsw-TMT	0.0315	1.006	1.149	0.0315	0.0315	0.786	0.983	0.0315	0.0315	0.91	1.016	0.0315	0.0315	1.033	1.086	0.0315	0.0315	0.733	0.864	0.0315
cPEALFQPSFLGMEScGIHETTFNSIMK-Q8WVW5-C1Carboxymethyl C16zsw-TMT	0.892	0.0315	0.978	0.0315	1.04	0.0315	0.923	0.0315	0.259	0.0315	0.584	0.0315	0.696	0.0315	0.676	0.0315	0.734	0.0315	0.967	0.0315
DDMIFEDcGDVPSEPK-B7Z9S8-C8zsw-TMT	0.0315	0.0315	0.957	0.848	0.0315	0.0315	0.86	0.821	0.0315	0.0315	1.171	0.969	0.0315	0.0315	0.834	0.858	0.0315	0.0315	0.951	0.732
LDYLDLYLIhWPTGFKPGK-P15121-H10zsw-TMT	1.208	0.915	1.175	0.932	0.629	0.676	0.583	0.543	0.595	0.588	0.615	0.606	0.611	0.607	0.616	0.57	0.937	0.984	0.942	0.973
NFQNIFPPSATLhLSNIPPSVSEEDLK-A6NLN1-H13zsw-TMT	1.14	1.227	1.108	1.03	0.945	1.047	1.091	0.957	0.947	1.009	0.933	0.934	1.043	0.997	0.983	0.919	0.811	0.864	0.831	0.852
DDPSKPVhLTAF-P39023-H8zsw-TMT	1.061	0.0315	0.939	0.0315	1.157	0.0315	1.325	0.0315	1.072	0.0315	1.147	0.0315	0.882	0.0315	0.998	0.0315	1.076	0.0315	1.036	0.0315
ETVYcLNDDDETEVLKEDIIQGFR-P13010-C5zsw-TMT	1.125	1.013	0.86	0.0315	1.394	1.324	1.22	0.0315	1.123	0.983	0.973	0.0315	0.956	0.957	0.558	0.0315	1.028	1.03	0.672	0.0315
TSDIFFDNFIIcADR-P27824-C12zsw-TMT	1.029	0.946	0.979	1.093	1.17	1.127	1.226	1.146	0.853	0.806	0.892	1.023	0.979	0.966	0.949	1.06	1.122	1.097	1.227	1.128
FVDhVFDEQVIDSLTVK-P04843-H4zsw-TMT	1.121	1.058	1.047	1.017	0.916	1.02	1.07	1.213	0.908	1.05	0.913	0.979	0.969	1.038	0.818	1.03	0.79	1.042	0.877	1.038
FFQTAcDVPELQDK-A4QPB0-C6zsw-TMT	0.0315	0.0315	1.003	1.057	0.0315	0.0315	1.176	0.905	0.0315	0.0315	0.965	0.97	0.0315	0.0315	1.15	1.16	0.0315	0.0315	1.004	0.911
LFYADhPFIFLVR-P50454-H6zsw-TMT	1.201	0.0315	0.0315	1.208	0.844	0.0315	0.0315	1.034	0.728	0.0315	0.0315	0.935	1.098	0.0315	0.0315	1.387	0.903	0.0315	0.0315	1.121
YSDESGNMDFDNFIScLVR-P04632-C16zsw-TMT	1.591	1.464	1.409	1.151	0.714	0.728	0.925	0.632	0.471	0.457	0.543	0.676	0.791	0.688	0.625	0.813	1.287	1.027	1.108	1.034
DIDDDLEGEVTEEcGK-A0A0J9YYL3-C14zsw-TMT	0.969	1.149	1.089	1.167	0.971	1.012	1.037	1.02	0.912	0.968	1.098	1.146	0.849	1.133	1.034	1.047	0.616	0.785	0.862	1.142
SIAFhSAVSLDPIK-B0AZV0-H5zsw-TMT	0.0315	1.008	0.914	0.996	0.0315	0.937	0.895	0.856	0.0315	1.088	0.908	1.023	0.0315	1.148	1.1	1.153	0.0315	0.791	1.009	0.763
TLhPDLGTDK-P00338-H3zsw-TMT	1.061	0.848	1.023	1.14	1.117	1.072	1.253	0.98	1.065	1.352	1.231	0.929	0.93	0.913	1.01	0.939	1.742	2.097	2.315	1.147
FSGWYDADLSPAGhEEAK-P18669-H14zsw-TMT	0.909	1.078	0.95	0.82	1.107	1.191	0.983	0.907	1.205	1.16	1.248	0.973	1.347	1.327	1.238	1.079	1.542	1.473	1.507	1.241
ENVPPGPEVcITHQEGEK-F8VQE1-C10zsw-TMT	0.0315	0.908	0.688	0.0315	0.0315	0.899	0.915	0.0315	0.0315	0.925	0.93	0.0315	0.0315	0.922	0.951	0.0315	0.0315	0.933	1.009	0.0315
hGLEVIYMIEPIDEYcVQQLK-P07900-H1zsw-TMT C16zsw-TMT	0.966	0.82	1.158	0.678	1.299	1.303	1.163	1.231	1.277	1.175	0.998	1.48	1.357	1.167	0.96	1.369	1.149	1.232	1.11	1.227
DLEEDHAcIPIK-P13639-C8zsw-TMT	0.97	0.947	1.03	0.0315	0.965	0.994	0.999	0.0315	0.901	0.93	0.867	0.0315	1.071	1.032	1.066	0.0315	0.915	0.917	0.82	0.0315
HELQANcYEEVK-G3V1A4-C7zsw-TMT	1.17	1.156	1.033	1.034	0.964	1.184	0.973	1.056	0.711	0.874	0.627	0.727	1.001	0.956	0.947	0.997	1.061	1.097	1.002	1.151
DVQIGDIVTVGEcRPL-P62280-C13zsw-TMT	0.685	0.0315	1.29	1.217	0.0315	0.0315	0.865	0.798	0.248	0.0315	0.808	0.672	0.0315	0.0315	1.125	0.953	0.0315	0.0315	1.178	1.1
cEFQDAYVLLSEK-B3GQS7-C1zsw-TMT	1.211	1.133	1.186	0.992	0.99	0.945	0.918	0.89	0.971	0.915	0.989	0.926	1.075	0.924	0.975	0.88	0.895	0.802	0.862	0.8
VVDLMAhMASK-P04406-H7zsw-TMT	1.057	1.042	1.108	0.917	0.786	0.826	0.811	0.712	0.673	0.738	0.641	0.59	0.876	0.88	0.88	0.903	0.903	0.942	0.746	0.691
VNVPVIGGhAGK-Q75MT9-H9zsw-TMT	0.902	1.107	0.833	0.0315	1.964	1.733	1.687	0.0315	2.482	2.193	1.498	0.0315	0.748	0.764	0.685	0.0315	1.1	0.909	1.079	0.0315
LQMEAPhIIVGTPGR-A8K7F6-H7zsw-TMT	1.101	0.79	0.0315	1.04	0.8	0.932	0.0315	0.94	1.023	1.147	0.0315	1.046	0.999	1.097	0.0315	1.08	1.533	1.165	0.0315	1.024
FLEGTScIAGVFVDATK-Q15149-C7zsw-TMT	1.061	0.0315	1.082	0.94	0.878	0.0315	0.777	0.834	0.655	0.0315	0.819	0.829	0.969	0.0315	0.786	0.816	0.751	0.0315	0.718	0.709
FLEEhPGGEEVLR-Q59F44-H5zsw-TMT	0.745	1.092	1.031	0.895	1.16	1.3	1.202	1.152	1.224	1.577	1.361	1.165	0.846	0.903	0.898	0.902	0.832	0.91	0.965	1.056
ALDLDSScK-A8K690-C8zsw-TMT	0.928	1.068	0.0315	0.0315	0.975	0.94	0.0315	0.0315	1.103	1.005	0.0315	0.0315	1.13	1.002	0.0315	0.0315	1.153	1.239	0.0315	0.0315
GLVPVLENSQGQLIYESAITcEYLDEAYPGK-B2R983-C21zsw-TMT	0.917	0.0315	0.0315	0.792	1.031	0.0315	0.0315	0.742	0.525	0.0315	0.0315	0.529	0.517	0.0315	0.0315	0.659	0.672	0.0315	0.0315	0.723
VETSDEEIhDLHQR-P07099-H9zsw-TMT	0.0315	0.878	0.0315	0.884	0.0315	0.861	0.0315	0.936	0.0315	0.964	0.0315	1.053	0.0315	0.489	0.0315	0.469	0.0315	0.913	0.0315	0.855
IWcFGPDGTGPNILTDITK-P13639-C3zsw-TMT	1.293	1.195	1.14	1.271	1.118	0.927	0.876	0.795	0.899	0.734	0.721	0.756	1.161	1.075	1.038	1.036	1.055	0.955	0.819	0.862
FVhDNYVIR-A8K134-H3zsw-TMT	0.0315	0.677	0.911	0.965	0.0315	0.955	1.037	0.978	0.0315	1.165	1.176	1.182	0.0315	1.486	1.909	1.733	0.0315	1.926	1.997	1.821
hLTYENVER-H3BMH2-H1zsw-TMT	0.908	0.853	0.842	0.89	1.162	0.939	1.46	1.495	0.98	0.675	1.15	1.171	0.738	0.607	0.665	0.951	0.848	0.798	1.105	1.193
VLHEAEGHIVTcETNTGEVYR-P62318-C12zsw-TMT	1.281	1.12	0.995	0.0315	1.356	0.754	1.174	0.0315	0.904	0.841	0.97	0.0315	1.057	0.533	0.989	0.0315	1.2	0.917	1.072	0.0315
FShEEIAMATVTAL-P04075-H3zsw-TMT	0.0315	1.089	1.129	0.0315	0.0315	0.806	0.918	0.0315	0.0315	1.077	0.922	0.0315	0.0315	1.121	0.939	0.0315	0.0315	1.141	0.768	0.0315
GAEILEVLhSLPAVR-Q15008-H9zsw-TMT	1.137	0.0315	1.241	1.23	0.861	0.0315	0.849	0.979	0.883	0.0315	1.003	1.137	1.15	0.0315	1.028	1.029	1.073	0.0315	0.919	1.06
SHTEEDcTEELFDFLHAR-Q567R0-C7zsw-TMT	0.0315	1.152	0.0315	0.843	0.0315	1.08	0.0315	0.831	0.0315	0.915	0.0315	0.829	0.0315	1.222	0.0315	0.752	0.0315	0.982	0.0315	0.809
LTWHScPEDEAQ-Q13185-C6zsw-TMT	0.861	1.073	0.0315	0.0315	0.957	1.386	0.0315	0.0315	0.636	1.133	0.0315	0.0315	0.808	1.111	0.0315	0.0315	0.789	1.092	0.0315	0.0315
HEQNIDcGGGYVK-P27797-C7zsw-TMT	1.058	0.0315	0.769	1.05	1.703	0.0315	2.226	1.985	1.494	0.0315	1.791	1.776	0.907	0.0315	1.103	1.117	0.966	0.0315	1.47	1.576
PMcVESFSDYPPLGR-P68104-C3zsw-TMT	0.0315	0.977	1.045	1.272	0.0315	0.931	0.816	0.863	0.0315	1.057	0.978	1.085	0.0315	1.086	1.128	1.219	0.0315	1.207	0.942	1.101
GYSLVSGGTDNhLVLVDLRPK-A0A024RB99-H12zsw-TMT	0.0315	0.825	1.097	0.932	0.0315	1.184	1.236	1.063	0.0315	1.43	1.522	1.222	0.0315	0.847	1.11	0.679	0.0315	0.821	1.111	0.786
THEAEIVEGENhTYCIR-Q5HY54-H12zsw-TMT	0.807	0.908	0.862	0.828	0.835	0.796	0.936	0.891	0.786	0.977	0.845	0.826	0.837	0.953	1.052	0.839	1.003	0.994	1.006	1.118
ALSSQhQAR-P11021-H6zsw-TMT	0.0315	0.55	0.899	0.0315	0.0315	2.744	1.937	0.0315	0.0315	3.904	2.096	0.0315	0.0315	2.095	1.658	0.0315	0.0315	2.415	1.64	0.0315
hLWDYTFGPEK-B4DWQ5-H1zsw-TMT	0.987	0.827	0.0315	0.816	0.686	0.856	0.0315	1.027	1.717	2.007	0.0315	1.713	1.157	0.83	0.0315	1.172	1.241	1.04	0.0315	1.596
VIISAPSADAPMFVMGVNhEK-P04406-H19zsw-TMT	1.05	1.277	1.082	1.005	0.745	0.662	0.935	0.488	0.635	0.513	0.936	0.601	1.031	1.808	1.129	0.879	0.78	1.563	1.072	0.576
SKDDQVTVIGAGVTLhEALAAAELLK-B4E022-H16zsw-TMT	1.024	0.839	0.992	0.86	0.942	0.854	0.761	0.764	0.695	0.578	0.706	0.732	0.948	0.683	0.662	0.764	1.355	1.086	1.2	1.02
VFIMDScDELIPEYL-P08238-C7zsw-TMT	0.0315	1.52	0.0315	2.019	0.0315	1.29	0.0315	1.281	0.0315	1.029	0.0315	0.829	0.0315	1.116	0.0315	0.0315	0.0315	2.272	0.0315	2.566
hLEINPDhPIVETLR-P08238-H1zsw-TMT H8zsw-TMT	0.598	0.0315	0.725	0.734	0.981	0.0315	0.97	1.089	1.612	0.0315	2.174	1.366	1.866	0.0315	2.152	2.071	0.756	0.0315	0.727	0.76
SQTIYEIIDNSQGFYVcPVEPQNR-Q9Y617-C17zsw-TMT	1.5	1.425	1.549	0.0315	0.972	1.077	0.873	0.0315	1.01	1.322	1.289	0.0315	0.92	1.01	0.855	0.0315	1.356	1.288	1.232	0.0315
ELNNTcEPVVTQPK-B4DF68-C6zsw-TMT	1.127	0.0315	1.001	0.0315	1.323	0.0315	1.344	0.0315	1.469	0.0315	1.24	0.0315	1.362	0.0315	1.6	0.0315	1.312	0.0315	1.293	0.0315
HHWVNCVchQEIR-Q56S53-C8Carboxymethyl H9zsw-TMT	0.0315	1.951	0.0315	0.0315	0.0315	1.121	0.671	0.0315	0.0315	0.587	0.66	0.0315	0.0315	1.207	1.076	0.0315	0.0315	1.105	0.807	0.0315
LFENQLVGPESIAhIGDVMFTGTADGR-Q9HDC9-H14zsw-TMT	1.097	1.322	1.094	0.901	0.904	1.011	0.666	0.829	0.982	1.056	0.845	0.851	1.06	0.735	0.726	0.643	1.003	0.975	0.653	0.713
hNIQFSSFDIFSDEEVR-O76003-H1zsw-TMT	1.128	0.0315	0.0315	0.885	0.945	0.0315	0.0315	0.643	1.06	0.0315	0.0315	0.836	1.127	0.0315	0.0315	0.681	0.969	0.0315	0.0315	0.837
hLMLPDFDLLEDIESK-P13010-H1zsw-TMT	1.074	1.039	1.339	1.023	1.209	1.395	1.146	1.042	0.87	0.977	0.971	0.882	1.034	1.034	0.948	0.811	1.122	1.159	1.239	1.038
FAhTNVESLVNEYDDNGEGIILF-P30101-H3zsw-TMT	1.032	0.897	1.184	1.093	1.01	0.872	1.076	0.92	0.747	0.858	0.858	0.86	0.745	0.693	0.642	0.626	1.034	0.779	1.209	0.944
hFDETVNR-P04843-H1zsw-TMT	0.914	0.934	0.0315	0.771	2.513	2.288	0.0315	2.46	1.948	1.694	0.0315	2.094	1.107	0.908	0.0315	0.949	1.253	1.065	0.0315	1.356
hSQFIGYPITLYLEK-P08238-H1zsw-TMT	0.0315	0.989	0.0315	0.866	0.0315	0.918	0.0315	0.777	0.0315	1.098	0.0315	1.091	0.0315	1.341	0.0315	1.182	0.0315	0.835	0.0315	0.644
YhPGYFGK-Q9BQQ5-H2zsw-TMT	0.956	0.975	0.916	0.991	0.946	1.178	1.091	1.132	1.009	1.429	0.998	1.399	0.991	1.363	1.016	1.323	0.722	1.431	1.123	1.032
MFSEADAcELWIDEK-D6W5C0-C8zsw-TMT	0.0315	0.763	0.899	1.018	0.0315	1.169	1.052	1.273	0.0315	0.838	0.926	0.914	0.0315	0.859	0.818	0.663	0.0315	0.781	0.64	0.697
VFImDNcEELIPEYLNFIR-P07900-M4Oxidation C7zsw-TMT	0.999	0.701	0.919	0.939	1.065	1.117	0.985	1.086	0.723	0.814	0.733	0.665	1.063	0.899	0.972	0.958	1.096	1.033	1.083	1.202
VQQAcEMVMDILR-A0A087WTP3-C5zsw-TMT	0.992	1.067	0.956	0.918	1.147	1.191	1.248	1.667	0.866	0.898	0.912	0.785	1.077	1.071	1.087	0.934	0.846	0.961	1.018	0.886
VETSDEEIHDLhQR-P07099-H12zsw-TMT	0.94	0.0315	0.934	0.0315	0.823	0.0315	0.899	0.0315	0.97	0.0315	1.11	0.0315	0.46	0.0315	0.58	0.0315	0.962	0.0315	1.022	0.0315
IAGYVThLMK-P08708-H7zsw-TMT	0.0315	1.092	0.0315	1.074	0.0315	1.055	0.0315	0.946	0.0315	0.897	0.0315	0.948	0.0315	1.057	0.0315	1.257	0.0315	1.205	0.0315	1.266
IIVDTYGGWGAhGGGAFSGK-B4DEX8-H12zsw-TMT	0.96	1.143	1.017	0.799	1.362	1.251	1.168	1.28	1.444	1.555	1.377	1.392	1.157	1.46	1.027	0.998	1.565	1.455	1.452	1.475
ETNPVVFFDVcADGEPLGR-P49792-C11zsw-TMT	0.0315	0.744	1.165	0.0315	0.0315	0.92	1.107	0.0315	0.0315	0.885	1.09	0.0315	0.0315	0.947	1.026	0.0315	0.0315	1.039	0.991	0.0315
LSLEGDhSTPPSAYGSVK-P07355-H7zsw-TMT	0.638	0.739	0.597	0.943	0.623	0.92	0.835	0.918	0.561	0.6	0.686	0.654	0.684	0.725	0.745	0.966	0.993	1.075	0.98	0.957
FDTGNLcMVTGGANLGR-Q96IR1-C7zsw-TMT	1.321	1.171	0.0315	1.009	0.767	0.855	0.0315	0.564	1.222	1.092	0.0315	0.835	1.013	0.959	0.0315	0.876	0.953	0.792	0.0315	0.654
YhEQLSTQSLIELFESFK-Q00610-H2zsw-TMT	1.026	1.312	0.951	0.0315	1.113	1.716	0.934	0.0315	0.701	0.848	0.749	0.0315	0.971	1.534	1.13	0.0315	0.872	1.758	1.096	0.0315
VVDLMAhMA-P04406-H7zsw-TMT	1.03	0.999	1.094	0.0315	0.957	0.865	1.011	0.0315	0.915	0.879	1.144	0.0315	1.233	1.02	1.199	0.0315	0.9	0.808	1.003	0.0315
GISEETTTGVhNLYK-Q1RMG2-H11zsw-TMT	0.733	0.865	1.001	0.95	1.025	1.158	1.298	1.35	1.101	1.264	1.411	1.422	1.084	1.025	1.05	1.173	1.076	1.153	1.137	1.419
GLAPDLPEDLYhLIK-J3KMX5-H12zsw-TMT	1.109	0.0315	0.0315	1.095	1.027	0.0315	0.0315	0.941	1.008	0.0315	0.0315	0.934	1.11	0.0315	0.0315	1.137	0.925	0.0315	0.0315	0.916
ELNLDQFhDK-P27824-H8zsw-TMT	0.0315	0.0315	0.864	0.95	0.0315	0.0315	1.156	1.369	0.0315	0.0315	0.71	1.134	0.0315	0.0315	0.577	0.637	0.0315	0.0315	0.593	0.764
TTGIVmDSGDGVTHTVPIYEGYALPhAILR-Q8WVW5-M6Oxidation H26zsw-TMT	0.0315	0.0315	0.976	0.976	0.0315	0.0315	1.144	0.992	0.0315	0.0315	0.788	0.669	0.0315	0.0315	1.005	0.931	0.0315	0.0315	0.967	0.941
ALLGEEDEEALhYLTR-A0A024R895-H12zsw-TMT	0.0315	0.0315	1.06	0.846	0.0315	0.0315	0.966	0.855	0.0315	0.0315	0.88	0.909	0.0315	0.0315	1.198	1.225	0.0315	0.0315	0.991	0.955
AYIDNLMADGTcQDAAIVGYK-P07737-C12zsw-TMT	1.066	1.184	1.182	1.035	0.945	0.894	0.914	0.808	0.897	0.984	0.968	0.718	1.198	1.349	1.025	1.068	1.015	1.061	1.13	1.118
MhGGTGFAGIDSSSPEVK-Q15365-H2zsw-TMT	0.882	0.889	0.683	0.82	1.323	1.555	1.453	1.491	1.337	1.805	1.623	1.596	0.853	1.165	1.235	1.298	0.813	1.57	1.393	1.337
ELVLDNcK-Q53F35-C7zsw-TMT	0.939	0.87	0.0315	1.004	1.184	1.133	0.0315	1.308	1.147	1.11	0.0315	1.456	1.082	1.059	0.0315	1.197	1.178	1.001	0.0315	1.259
ALVLDcHYPEDEVGQEDEAESDIFSIR-Q07021-C6zsw-TMT	0.586	0.504	0.412	0.0315	1.153	1.167	1.077	0.0315	0.753	0.833	0.778	0.0315	0.754	0.814	0.619	0.0315	0.638	0.509	0.512	0.0315
DmAIATGGAVFGEEGLTLNLEDVQPhDLGK-B3GQS7-M2Oxidation H26zsw-TMT	0.0315	0.0315	1.157	1.28	0.0315	0.0315	1.188	1.072	0.0315	0.0315	1.244	1.145	0.0315	0.0315	1.075	1.077	0.0315	0.0315	1.196	1.229
GGhFAAFEEPELLAQDIR-P07099-H3zsw-TMT	1.055	1.045	0.904	1.021	0.899	0.849	0.803	0.969	1.044	1.151	1.115	1.176	1.28	0.901	1.003	1.083	0.907	1.128	1.064	1.048
DAGYEFDIcFTSVQK-P18669-C9zsw-TMT	1.23	1.151	1.179	1.159	0.964	0.87	0.908	0.906	0.894	0.969	0.942	1.007	1.215	1.108	1.05	1.124	1.137	1.276	1.273	1.24
SGcSMGEYFR-P25705-C3zsw-TMT	0.958	1.002	1.035	1.03	0.954	0.913	0.895	0.912	0.844	0.842	0.979	0.862	0.749	0.827	1.045	0.879	0.706	0.721	0.892	0.718
AcHDSFLK-P31949-C2zsw-TMT	0.978	0.867	0.879	0.966	0.76	0.695	0.815	0.875	0.82	0.652	0.758	0.977	0.984	0.84	0.981	1.045	1.138	1.321	1.262	1.299
TPELNLDQFhDK-P27824-H10zsw-TMT	1.039	1.155	0.889	1.103	1.011	0.906	0.873	0.862	1.419	1.291	1.143	1.372	1.17	1.193	0.98	1.193	1.126	1.27	1.097	1.167
KDGNASGTTLLEALDcILPPTRPTDKPLR-P68104-C16zsw-TMT	0.0315	1.442	1.622	1.351	0.0315	0.556	0.449	0.437	0.0315	0.656	0.689	0.566	0.0315	0.97	0.796	0.865	0.0315	0.681	0.553	0.647
NTAEWLLShTK-P00491-H9zsw-TMT	1.074	0.987	1.007	0.894	0.926	0.875	0.839	0.973	0.838	0.819	0.892	0.915	0.947	1.261	1.164	1.116	0.97	0.889	0.866	0.875
ISGETIFVTAPhEATAGIIGVNR-Q00610-H12zsw-TMT	1.039	1.023	0.969	0.868	1.029	0.993	1.016	0.998	1.082	0.95	1.16	1.054	1.292	1.011	1.119	0.953	0.925	1.102	1.134	1.051
GEhPGLSIGDVAK-P09429-H3zsw-TMT	0.942	0.866	0.718	1.036	1.42	1.27	1.44	1.382	1.006	1.002	1.105	1.098	1.212	1.24	1.361	1.248	1.166	0.986	1.303	1.14
DTTALSFFhMLNGAALR-P42704-H9zsw-TMT	1.03	0.0315	1.018	0.0315	0.907	0.0315	0.826	0.0315	1.131	0.0315	1.205	0.0315	1.049	0.0315	0.827	0.0315	0.732	0.0315	0.562	0.0315
AQAVLEEDhYGMEDVK-K7ER27-H9zsw-TMT	0.0315	0.0315	0.99	1.009	0.0315	0.0315	1.49	1.545	0.0315	0.0315	1.331	1.303	0.0315	0.0315	0.904	0.963	0.0315	0.0315	1.21	1.179
LSYLDVYLIhWPQGFK-O60218-H10zsw-TMT	1.201	1.324	1.163	1.303	0.383	0.318	0.461	0.409	0.394	0.36	0.445	0.447	0.413	0.399	0.578	0.556	0.403	0.367	0.517	0.469
ESDDPMAYIhF-Q5CAQ5-H10zsw-TMT	1.188	0.983	0.904	0.825	1.307	1.145	0.929	1.021	1.224	1.152	1.03	1.04	1.407	1.282	1.053	1.062	1.099	0.962	0.859	0.888
GPVTIPYPLFQShVEDLYVEGLPEGIPFR-A0A1W6S962-H13zsw-TMT	0.0315	1.3	0.795	1.404	0.0315	1.715	0.978	1.358	0.0315	0.694	0.631	0.965	0.0315	0.998	0.695	0.707	0.0315	1.616	0.595	0.902
FHDFLGDSWGILFShPR-P30041-H15zsw-TMT	1.068	0.962	0.0315	1.178	0.977	1.029	0.0315	1.078	0.963	0.937	0.0315	1.257	1.164	1.081	0.0315	1.058	0.922	1	0.0315	1.22
hSGNITFDEIVNIAR-P30050-H1zsw-TMT	1.041	1.013	0.973	0.978	0.734	0.802	0.951	1.258	0.782	0.766	0.745	0.678	0.816	1.068	0.941	1.274	0.734	0.927	0.782	1.329
LEThMTPEMFR-Q08211-H4zsw-TMT	0.0315	1.161	0.935	0.0315	0.0315	1.218	1.257	0.0315	0.0315	1.014	1.174	0.0315	0.0315	0.988	1.077	0.0315	0.0315	1.207	1.145	0.0315
DVLNLVYLcEALNLPEVAR-O60701-C9zsw-TMT	1.084	1.236	1.063	1.327	0.628	0.821	0.63	0.935	0.448	0.696	0.54	0.751	0.265	0.471	0.401	0.487	0.4	0.0315	0.563	0.612
SEASLhPVLMSEAPWNTR-H7C5S0-H6zsw-TMT	0.0315	0.915	0.0315	1.082	0.0315	0.851	0.0315	1.149	0.0315	0.984	0.0315	1.228	0.0315	0.76	0.0315	1.038	0.0315	0.526	0.0315	0.904
LVGSQEELASWGhEYVR-Q13200-H13zsw-TMT	0.773	0.844	0.847	0.813	1.05	1.175	1.31	1.369	1.07	1.426	1.351	1.424	0.953	1.233	1.19	1.116	0.845	1.193	1.184	1.333
ADDTFEALcIEPF-B8ZZU8-C9zsw-TMT	1.067	0.998	0.876	0.877	1.074	0.953	0.931	0.944	0.684	0.684	0.658	0.691	0.808	0.905	0.8	0.789	1.421	1.164	1.278	1.417
GSGNLEAIhIIK-P78371-H9zsw-TMT	0.896	0.985	0.849	0.993	1.146	1.077	1.146	1.256	1.056	1.014	1.033	1.127	1.029	1.162	1.345	1.533	1.103	1.162	1.121	1.238
YDDMATcMK-P27348-C7zsw-TMT	1.055	0.917	1.063	0.879	1.074	1.006	1.141	1.152	1.119	0.975	1.048	0.982	1.137	1.108	1.261	0.976	1.386	1.319	1.399	0.96
hLSVNDLPVGR-P30048-H1zsw-TMT	0.735	0.71	0.738	0.818	1.105	0.973	1.238	0.996	1.05	1.097	1.198	1.399	0.655	0.582	0.737	0.708	0.677	0.486	0.769	0.757
VLDFEhFLPMLQTVAK-G8JLA2-H6zsw-TMT	0.0315	1.106	1.094	1.014	0.0315	0.913	0.966	0.851	0.0315	0.726	0.817	0.791	0.0315	1.063	1.078	1.026	0.0315	0.892	1.112	1.089
hLHYWFVESQK-B4E324-H1zsw-TMT	1.095	0.0315	0.9	0.0315	0.937	0.0315	0.897	0.0315	0.971	0.0315	1.063	0.0315	0.778	0.0315	0.854	0.0315	0.653	0.0315	0.831	0.0315
GISDLAQhYLMR-B3KX11-H8zsw-TMT	0.83	0.0315	0.0315	0.976	0.911	0.0315	0.0315	0.91	0.945	0.0315	0.0315	0.894	1.188	0.0315	0.0315	1.328	0.586	0.0315	0.0315	0.874
ENQWcEEK-E5RJR5-C5zsw-TMT	0.0315	0.0315	0.952	0.891	0.0315	0.0315	1.413	1.361	0.0315	0.0315	1.408	1.356	0.0315	0.0315	1.272	1.074	0.0315	0.0315	1.585	1.531
LGGTIDDcELVEGLVLTQK-B7Z9L0-C8zsw-TMT	0.996	1.081	0.0315	1.022	0.94	0.972	0.0315	0.78	0.822	0.78	0.0315	0.756	1.194	1.076	0.0315	1.065	0.98	0.962	0.0315	0.869
AQIhDLVLVGGSTR-A0A1U9X7W4-H4zsw-TMT	1.116	0.944	0.858	0.955	0.814	0.99	0.704	0.941	1.26	1.13	0.992	1.159	1.496	1.143	1.197	1.247	1.426	1.245	1.246	1.246
IGPALScGNTVVVKPAEQTPLTALHVASLIK-P00352-C7zsw-TMT	1.592	0.924	1.463	1.597	0.616	0.472	0.665	0.708	0.805	0.853	0.958	0.951	0.768	0.588	0.751	0.774	0.95	0.826	1	0.806
IhPVSTMVK-P07195-H2zsw-TMT	0.451	1.154	0.877	0.545	0.148	0.801	0.437	0.47	0.121	1.175	0.518	0.477	0.28	1.027	1.284	0.567	0.0315	2.606	1.48	1.606
GFQQILAGEYDhLPEQAFYmVGPIEEAVAK-P06576-H12zsw-TMT M20Oxidation	0.0315	1.467	1.032	1.052	0.0315	1.192	1.042	1.289	0.0315	1.01	1.047	0.983	0.0315	1.524	1.119	1.116	0.0315	1.166	0.956	1.023
ELEVQhPAAK-P50990-H6zsw-TMT	0.0315	0.851	0.935	0.994	0.0315	1.294	1.055	1.365	0.0315	1.287	0.851	1.339	0.0315	1.249	0.915	1.602	0.0315	1.355	0.98	1.61
SIQFVDWcPTGFK-P68366-C8zsw-TMT	1.153	1.112	0.0315	1.21	0.892	0.778	0.0315	0.817	0.862	0.916	0.0315	1.007	1.029	1.128	0.0315	1.106	0.806	1.024	0.0315	1.287
EAEETQSTLQAEcDQYR-A0A0A0MRV0-C13zsw-TMT	1.019	0.0315	0.0315	0.932	1.772	0.0315	0.0315	1.44	1.536	0.0315	0.0315	1.436	0.791	0.0315	0.0315	0.985	0.943	0.0315	0.0315	1.171
DINAYNcEEPTEK-P30041-C7zsw-TMT	1.398	0.902	1.249	1.258	1.372	0.946	1.293	1.135	0.989	0.848	0.95	1.022	1.055	0.756	0.935	1.072	2.114	1.288	1.826	1.891
IVGYFVSGcDPSIMGIGPVPAISGALK-K7EME0-C9zsw-TMT	0.0315	0.792	1.054	1.07	0.0315	1.406	1.303	1.414	0.0315	0.955	1.057	0.986	0.0315	0.965	0.838	0.539	0.0315	1.292	1.169	1.206
VFIMDScDELIPEYLN-P08238-C7zsw-TMT	0.966	1.087	0.762	0.877	1.385	1.299	1.01	1.406	0.776	0.956	0.884	1.007	1.697	1.581	1.369	1.496	1.631	1.354	1.526	1.448
LLYEALVDcK-E9PRY0-C9zsw-TMT	1.096	1.084	1.009	1.061	0.985	0.965	0.891	0.879	0.87	0.822	0.85	0.838	1.153	1.205	1.121	1.193	0.876	0.787	0.861	0.938
TLIGhVPDQR-Q16822-H5zsw-TMT	0.89	0.924	0.0315	0.83	1.032	1.077	0.0315	0.977	1.417	1.365	0.0315	1.533	0.7	0.706	0.0315	0.713	0.734	0.723	0.0315	0.889
VADPVVTFcETVVETSSLK-Q8IXJ3-C9zsw-TMT	1.755	0.0315	1.305	1.098	1.557	0.0315	0.733	1.085	1.491	0.0315	0.822	0.951	1.237	0.0315	0.595	0.761	1.956	0.0315	0.796	1.008
LEGDLTGPSVGVEVPDVELEcPDAK-Q09666-C21zsw-TMT	0.876	1.145	1.2	0.972	0.721	0.723	0.756	0.795	0.822	0.579	0.824	0.731	1.135	0.889	0.794	0.903	1.233	1.416	1.307	1.428
VDEFVThNLSFDEINK-P11766-H7zsw-TMT	0.808	0.0315	0.94	0.857	1.224	0.0315	1.252	1.315	1.362	0.0315	1.611	1.699	0.898	0.0315	1	1.145	1.067	0.0315	1.062	0.985
HFADLLPGFLQAVNDScYQNDDSVLK-O00410-C17zsw-TMT	0.0315	0.0315	0.741	1.242	0.0315	0.0315	1.545	1.57	0.0315	0.0315	1.162	0.921	0.0315	0.0315	1.141	1.161	0.0315	0.0315	1.091	1.311
HLYTLDGGDIINALcFSPNR-P63244-C15zsw-TMT	1.339	1.382	1.224	1.378	0.802	0.877	0.786	0.818	0.688	0.847	0.839	0.796	1.071	1.109	1.073	1.222	0.661	0.789	0.687	0.731
YLhENLPIPQR-P54886-H3zsw-TMT	1.057	0.836	0.954	1.056	1.417	1.563	1.482	1.599	1.216	1.576	1.382	1.441	0.977	1.108	1.188	1.301	1.178	1.027	1.195	1.551
DVHNIYGLYVhMATADGLR-Q14697-H11zsw-TMT	0.0315	1.034	1.234	0.0315	0.0315	0.663	0.763	0.0315	0.0315	1.008	0.969	0.0315	0.0315	1.125	1.025	0.0315	0.0315	0.797	0.647	0.0315
YLAEVAcGDDR-P27348-C7zsw-TMT	0.895	0.92	0.92	0.94	0.911	0.871	0.994	0.867	0.878	0.757	1.037	0.834	0.991	0.91	1.284	1.045	1.416	1.089	1.851	1.103
AGKPVIcATQMLESMIK-P14618-C7zsw-TMT	0.0315	1.038	0.0315	1.135	0.0315	0.654	0.0315	0.523	0.0315	0.638	0.0315	0.602	0.0315	0.856	0.0315	0.954	0.0315	0.773	0.0315	0.795
DIEREDIEFIcK-B7Z9L0-C11zsw-TMT	0.0315	0.864	0.0315	1.044	0.0315	0.902	0.0315	0.906	0.0315	0.907	0.0315	0.964	0.0315	0.841	0.0315	1.045	0.0315	0.772	0.0315	0.879
YGDSEFTVQSTTGHcVH-B4DKS8-C15zsw-TMT	0.0315	0.967	0.872	1.009	0.0315	1.254	1.771	1.725	0.0315	1.573	1.82	1.839	0.0315	0.869	1.123	1.021	0.0315	0.906	1.312	1.486
NEScSENYTTDFIYQLYSEEGK-Q01813-C4zsw-TMT	0.905	1.233	1.077	0.772	0.891	0.534	0.768	0.794	0.834	0.657	0.698	0.745	1.302	1.119	1.013	1.027	1.141	0.821	1.015	0.951
TYGGcEGPDAMYVK-R4GMY8-C5zsw-TMT	0.855	0.964	1.036	1.076	1.142	1.209	1.108	1.264	1.277	1.105	1.053	1.374	1.059	0.986	1.032	1.271	1.063	1.038	1.042	1.195
TEQGGAhFSVSSLAEGSVTSVGSVNPAENFR-P13010-H7zsw-TMT	0.0315	0.897	1.007	1.196	0.0315	0.947	0.989	0.907	0.0315	1.207	1.415	1.57	0.0315	0.858	0.806	0.754	0.0315	1.314	1.291	1.212
GISVhISNAEPK-B1AKP7-H5zsw-TMT	0.0315	0.86	1.037	0.0315	0.513	1.237	1.224	0.0315	0.0315	1.388	1.241	0.0315	0.0315	0.895	1.153	0.0315	0.0315	1.058	1.293	0.0315
TPVEPEVAIhR-P60866-H10zsw-TMT	1.009	1.055	1.085	0.97	1.035	1.016	1.163	0.95	1.309	1.317	1.422	1.151	1.248	1.436	1.508	1.238	1.361	1.365	1.57	1.191
GTSYQSPhGIPIDLLDR-M0R0Y3-H8zsw-TMT	0.976	0.948	0.0315	0.0315	0.844	0.878	0.0315	0.0315	0.958	1.16	0.0315	0.0315	0.949	0.891	0.0315	0.0315	0.84	0.919	0.0315	0.0315
LLVFSTDAGFhFAGDGK-P05556-H11zsw-TMT	1.004	1.144	0.0315	0.0315	0.974	1.209	0.0315	0.0315	0.997	1.26	0.0315	0.0315	0.952	1.109	0.0315	0.0315	1.025	1.283	0.0315	0.0315
AQTAhIVLEDGTK-A8K134-H5zsw-TMT	0.0315	0.96	0.991	1.082	0.0315	1.01	0.963	0.939	0.0315	0.883	1.013	0.801	0.0315	1.259	1.409	1.381	0.0315	2.195	2.613	2.466
YDGhLPIEIK-P43490-H4zsw-TMT	0.705	0.886	0.822	0.864	0.74	0.761	0.714	0.624	0.64	0.713	0.627	0.611	0.704	0.749	0.635	0.714	0.612	0.646	0.609	0.649
VShQGYSTEAEFEEPR-B2R6S9-H3zsw-TMT	0.916	0.0315	1.114	0.0315	1.912	0.0315	2.299	0.0315	2.352	0.0315	2.284	0.0315	1.102	0.0315	1.46	0.0315	1.487	0.0315	1.941	0.0315
NEEDEGhSNSSPR-A0A024RDF4-H7zsw-TMT	0.95	0.0315	1.309	0.0315	1.764	0.0315	1.706	0.0315	1.369	0.0315	1.392	0.0315	1.17	0.0315	0.95	0.0315	1.405	0.0315	1.571	0.0315
FAhTNVESLVNEYDDNGEGIILFR-P30101-H3zsw-TMT	0.829	0.762	1.031	0.673	1.108	1.326	1.322	1.355	1.062	1.039	0.803	0.81	0.744	0.901	0.971	0.545	1.115	1.138	1.255	0.588
LcYVALDFEQEMATAASSSSLEK-Q8WVW5-C2zsw-TMT	0.977	0.0315	1.094	0.941	0.819	0.0315	0.755	0.784	0.692	0.0315	0.588	0.704	0.842	0.0315	0.722	0.64	0.926	0.0315	0.809	0.664
FFhLAFEEEFGR-Q9P1D9-H3zsw-TMT	0.92	0.953	1.123	0.0315	1.042	0.964	1.021	0.0315	0.799	0.81	0.831	0.0315	0.813	0.969	1.296	0.0315	0.796	0.75	0.897	0.0315
SIVVVQWAGLIIcK-B4DRW5-C13zsw-TMT	0.937	0.822	0.0315	0.687	0.51	0.371	0.0315	0.392	0.496	0.439	0.0315	0.402	0.733	0.741	0.0315	0.502	0.64	0.703	0.0315	0.578
EHINLGcDMDFDIAGPSIR-P21796-C7zsw-TMT	1.108	0.948	0.98	1	0.828	0.759	0.735	0.841	0.872	0.838	0.705	0.881	1.112	1.053	0.908	0.98	0.918	0.714	0.835	0.9
LIFPYVELDLhSYDLGIENR-Q0QER2-H11zsw-TMT	0.754	1.128	0.896	0.929	1.117	1.27	1.138	1.194	1.233	1.25	1.266	1.14	0.811	1.09	0.743	0.676	1.864	1.476	1.661	1.814
IAAESSENVDcPENPK-A0A0F7NGI8-C11zsw-TMT	0.757	0.893	0.802	1.047	1.129	1.273	1.146	1.174	1.004	1.121	1.01	1.421	0.979	0.909	0.959	0.87	1.408	1.602	1.402	1.411
ADHQPLTEASYVNLPTIALcNTDSPLR-C9J9K3-C20zsw-TMT	1.019	1.246	1.208	1.001	0.617	0.777	0.856	0.716	0.679	0.687	0.884	0.683	1.117	0.951	0.907	0.928	0.844	0.869	1.025	0.907
GPAVGIDLGTTYScVGVFQHGK-P11142-C14zsw-TMT	1.176	0.887	0.877	1.159	0.909	1.019	0.952	1.044	1.07	0.603	1.032	1.061	2.179	1.658	2.225	1.972	1.23	1.207	1.15	1.149
TFVDFFSQcLHEEYR-A0A1B0GV93-C9zsw-TMT	1.128	0.0315	0.0315	1.114	1.102	0.0315	0.0315	1.191	0.842	0.0315	0.0315	0.894	0.779	0.0315	0.0315	0.842	0.941	0.0315	0.0315	0.88
DTGIFLDLMhLK-P12956-H10zsw-TMT	1.052	0.972	1.089	1.126	1.16	1.074	1.18	1.201	0.908	0.868	0.902	0.989	1.338	1.226	1.206	1.409	1.029	0.921	1.04	1.037
YESLELcR-Q00610-C7zsw-TMT	0.0315	1.091	0.91	0.937	0.0315	1.067	0.91	0.924	0.0315	0.857	0.903	0.886	0.0315	1.002	1.069	1.075	0.0315	0.882	0.939	0.896
GGYVLhIGTIYGDLK-P49588-H6zsw-TMT	1.395	1.034	0.0315	0.918	0.938	0.751	0.0315	0.838	1.243	1.035	0.0315	1.222	1.158	0.957	0.0315	1.011	0.861	0.79	0.0315	0.787
hSQFLGYPITLYLEK-P08238-H1zsw-TMT	1.039	0.0315	0.93	0.0315	0.866	0.0315	0.836	0.0315	0.977	0.0315	0.915	0.0315	1.38	0.0315	1.264	0.0315	0.917	0.0315	0.759	0.0315
TTGIVMDSGDGVTHTVPIYEGYALPhAIL-Q8WVW5-H26zsw-TMT	0.0315	0.0315	1.203	0.91	0.0315	0.0315	0.836	0.724	0.0315	0.0315	0.656	0.724	0.0315	0.0315	0.974	0.591	0.0315	0.0315	1.435	0.517
ESSFDAVFLDPFDTcGLIVAK-Q13406-C15zsw-TMT	0.0315	0.0315	1.366	1.438	0.0315	0.0315	0.841	0.675	0.0315	0.0315	1.03	0.99	0.0315	0.0315	0.663	0.311	0.0315	0.0315	0.709	0.932
EVFSScSSEVVLSGDDEEYQR-Q09666-C6zsw-TMT	0.853	1.059	0.859	1.068	0.882	1.077	0.968	1.193	0.942	1.393	1.164	1.322	1.084	1.28	1.028	1.455	1.524	1.284	1.545	1.488
ThTYYQVLIDAR-B4DEM9-H2zsw-TMT	0.0315	0.0315	0.876	0.744	0.0315	0.0315	1.137	1.148	0.0315	0.0315	1.228	1.196	0.0315	0.0315	1.042	1.008	0.0315	0.0315	1.05	1.045
WWhTGALYR-B4E2Z3-H3zsw-TMT	1.039	1.038	0.0315	0.3	0.822	0.95	0.0315	0.23	1.219	1.717	0.0315	0.132	1.362	1.524	0.0315	0.2	0.738	0.968	0.0315	0.0315
ESNcYDPER-Q00610-C4zsw-TMT	0.0315	0.824	1.059	0.0315	0.0315	0.656	1.059	0.0315	0.0315	0.695	0.952	0.0315	0.0315	0.595	1.021	0.0315	0.0315	0.624	1.107	0.0315
HSSLAGcQIINYR-Q00610-C7zsw-TMT	1.132	0.973	1.043	1.116	1.028	0.994	0.918	1.066	1.046	0.939	0.993	1.043	0.956	0.922	0.911	0.988	0.89	0.765	0.755	0.82
DSNNLcLHFNPR-P09382-C6zsw-TMT	0.0315	0.8	0.871	0.0315	0.0315	1.037	0.894	0.0315	0.0315	1.341	1.15	0.0315	0.0315	1.051	0.977	0.0315	0.0315	0.864	1.08	0.0315
TSILAAANPISGhYDR-Q14566-H13zsw-TMT	0.759	0.919	1.182	0.808	1.435	1.353	1.205	1.304	1.428	1.46	1.327	1.16	0.989	1.159	1.243	1.082	1.052	1.386	1.339	1.222
DcEEcIQLEPTFIK-A8K690-C2zsw-TMT C5zsw-TMT	1.27	1.126	1.227	1.539	0.864	0.777	0.869	0.731	1.249	1.059	1.129	1.074	1.332	1.215	1.204	1.305	1.227	0.957	0.812	1.081
HIADLAGNSEVILPVPAFNVINGGShAGNK-P06733-H26zsw-TMT	1.425	1.143	1.363	1.034	0.846	0.712	0.693	0.65	1.022	0.788	0.772	0.73	1.214	1.393	1.3	1.019	1.089	0.909	0.982	0.803
WSSLAcNIALDAVK-B3KX11-C6zsw-TMT	0.962	0.0315	1.055	1.013	0.734	0.0315	0.663	0.754	0.629	0.0315	0.737	0.935	0.934	0.0315	0.8	0.916	0.716	0.0315	0.858	0.78
LGQSDPAPLQhQMDIYQK-B4E022-H11zsw-TMT	0.916	1.028	0.762	0.974	0.882	0.932	0.862	0.731	1.047	1.024	0.986	0.761	0.86	0.881	1.007	0.988	1.354	1.521	1.846	1.53
TYDATTHFETTcDDIK-P50395-C12zsw-TMT	0.0315	0.0315	1.004	1.317	0.0315	0.0315	1.1	1.241	0.0315	0.0315	1.27	1.56	0.0315	0.0315	1.074	1.649	0.0315	0.0315	1.053	1.39
TIEAEAAhGTVTR-P48735-H8zsw-TMT	1.064	1.024	0.994	0.0315	1.72	1.826	1.926	0.0315	1.07	1.36	1.324	0.0315	0.901	0.925	1.233	0.0315	1.032	0.995	1.333	0.0315
ALQEASEAYLVGLFEDTNLcAIHAK-K7EK07-C20zsw-TMT	1.481	0.0315	1.194	1.111	0.923	0.0315	0.768	0.875	0.495	0.0315	0.421	0.464	0.836	0.0315	0.761	0.818	0.906	0.0315	0.658	0.856
VHSPSGALEEcYVTEIDQDK-Q5HY54-C11zsw-TMT	0.854	0.915	0.886	0.913	0.68	0.733	0.761	0.843	0.763	0.829	0.851	0.826	0.967	0.93	0.872	0.878	1.069	1.165	1.144	1.204
EDEEESLNEVGYDDIGGcR-P55072-C18zsw-TMT	1.201	1.327	0.52	1.048	1.017	0.929	0.414	0.96	0.725	0.737	0.222	0.675	0.828	0.833	0.0315	0.933	0.861	0.963	0.0315	0.872
hGEVcPAGWKPGSDTIKPDVQK-Q06830-H1zsw-TMT C5zsw-TMT	1.03	0.908	0.957	1.112	0.789	0.744	0.745	0.678	1.027	0.932	0.991	0.908	0.896	0.859	1.001	0.896	1.788	1.363	1.717	1.544
GhVFEESQVAGTPMFVVK-P13639-H2zsw-TMT	1.088	1.194	0.952	0.991	1.407	1.393	1.304	1.217	1.267	1.242	1.214	1.338	1.225	1.157	1.361	1.273	1.445	1.285	1.298	1.271
GTMTTGhNVADLVVILK-B4DY09-H7zsw-TMT	0.0315	0.99	0.966	0.932	0.0315	0.748	0.96	0.837	0.0315	0.748	1.437	0.735	0.0315	0.84	1.056	0.717	0.0315	0.682	1.168	0.6
AGPNTNGSQFFIcTAK-A8K486-C13zsw-TMT	0.918	1.036	0.0315	1.003	0.74	0.816	0.0315	0.784	0.771	0.899	0.0315	1.027	0.921	1.03	0.0315	1.093	0.824	0.754	0.0315	0.945
WNSPAEEGSSDcEVFSK-B4DH02-C12zsw-TMT	0.0315	0.882	0.929	0.897	0.0315	1.164	1.487	1.251	0.0315	1.171	1.332	0.993	0.0315	1.248	1.489	1.275	0.0315	0.976	1.307	1.112
EALFQPSFLGMEScGIHETTFNSIMK-Q8WVW5-C14zsw-TMT	0.945	0.0315	0.852	0.88	1.08	0.0315	0.913	0.977	0.542	0.0315	0.438	0.663	0.619	0.0315	0.502	0.604	0.713	0.0315	0.626	0.596
VAHALAEGLGVIAcIGEK-V9HWK1-C14zsw-TMT	0.914	0.0315	1.242	1.294	0.837	0.0315	0.875	0.766	0.935	0.0315	0.938	0.924	0.945	0.0315	1.116	1.016	0.837	0.0315	1.055	1.04
QVAEVFTGhMGK-P06576-H9zsw-TMT	0.862	0.969	0.952	0.965	1.191	1.159	1.438	1.332	1.27	1.228	1.717	1.003	0.968	1.04	1.088	0.643	0.957	1.096	1.189	1.041
GFGFVcF-A0A087WTT1-C6zsw-TMT	1.182	0.0315	0.0315	1.117	1.057	0.0315	0.0315	1.075	0.922	0.0315	0.0315	0.911	1.134	0.0315	0.0315	1.343	1.119	0.0315	0.0315	1.224
VSFSYAGLSGDDPDLGPAhVVTVIAR-Q8TEP9-H19zsw-TMT	0.905	1.191	1.036	0.0315	0.641	0.699	0.489	0.0315	1.125	1.162	0.853	0.0315	0.846	0.874	0.66	0.0315	0.64	0.825	0.601	0.0315
GYAFIEYEhER-A8KAQ5-H9zsw-TMT	0.933	0.0315	0.0315	0.969	1.271	0.0315	0.0315	1.161	1.278	0.0315	0.0315	1.19	1.181	0.0315	0.0315	1.072	1.238	0.0315	0.0315	1.123
ANIVAYhDSIMNPDYNVEFFR-B2RDF5-H7zsw-TMT	0.964	0.719	0.996	1.004	1.036	1.273	0.96	1.245	1.013	0.872	0.922	1.025	1.098	0.873	0.879	1.067	0.885	1.162	0.899	1.05
FEIINAIYEPTEEEcEWKPDEEDEISEELK-F8VY35-C15zsw-TMT	1.203	1.207	0.817	1.032	0.713	0.601	0.439	0.614	0.556	0.78	0.295	0.66	0.809	0.929	0.529	0.744	1.422	1.022	0.602	1.248
SSWWThVEMGPPDPILGVTEAFK-A0A024R6W0-H6zsw-TMT	0.983	0.818	1.063	1.115	1.164	1.233	1.022	1.029	1.023	0.987	1.001	1.114	1.204	1.033	1.06	1.241	1.347	1.179	1.154	1.112
ScVEEPEPEPEAAEGDGDK-P51858-C2zsw-TMT	0.708	0.764	0.0315	0.0315	1.193	1.096	0.0315	0.0315	0.85	0.745	0.0315	0.0315	0.919	0.847	0.0315	0.0315	1.133	1.048	0.0315	0.0315
WEAAhVAEQWR-A0A1C9ZWK6-H5zsw-TMT	0.917	1.094	1.023	1.054	1.563	1.917	1.876	1.768	1.041	1.225	1.102	1.083	1.126	1.311	1.259	1.14	1.671	1.803	1.84	1.732
DFTVSAMhGDMDQK-A8K7F6-H8zsw-TMT	0.819	1.048	0.0315	0.768	0.863	0.971	0.0315	0.993	1.124	1.322	0.0315	1.103	0.891	1.016	0.0315	1.067	0.917	1.089	0.0315	0.938
HFVLDEcDK-O00148-C7zsw-TMT	0.798	1.127	0.947	0.933	1.006	0.965	1.151	0.941	0.775	0.788	1.186	0.908	0.842	0.749	1.085	0.868	0.594	0.62	1.019	0.845
KFPVFNPATEEELcQVEEGDKEDVDK-P00352-C14zsw-TMT	1.429	1.369	1.431	1.533	0.55	0.538	0.616	0.681	0.569	0.509	0.649	0.661	0.598	0.755	0.535	0.549	0.46	0.522	0.555	0.53
LEEEQIILEDQNcK-P35579-C13zsw-TMT	0.909	1.265	1.267	0.0315	0.752	0.964	0.914	0.0315	0.952	1.103	1.027	0.0315	0.95	1.044	1.056	0.0315	0.976	1.243	1.216	0.0315
IhPQTIIAGWR-P78371-H2zsw-TMT	0.866	1.014	0.953	0.0315	1.216	1.107	1.041	0.0315	1.143	1.199	1.145	0.0315	1.177	1.239	1.273	0.0315	0.921	1.001	1.143	0.0315
hLLGVEDLLQK-D6W5C0-H1zsw-TMT	0.964	0.0315	1.029	0.819	0.953	0.0315	1.189	1.113	0.976	0.0315	0.926	0.919	0.837	0.0315	0.987	0.945	0.74	0.0315	0.757	0.567
EAQAAMEGLNGQDLMGQPISVDWcFVR-Q9Y5S9-C24zsw-TMT	1.184	0.0315	1.108	0.992	0.989	0.0315	1.055	0.915	0.875	0.0315	0.895	0.893	0.613	0.0315	0.785	0.933	1.26	0.0315	1.127	1.032
ILGSGISSSSVLhGMVFK-P50990-H13zsw-TMT	0.0315	0.0315	0.83	1.147	0.0315	0.0315	0.853	0.875	0.0315	0.0315	0.886	0.84	0.0315	0.0315	1.1	1.02	0.0315	0.0315	0.771	1.092
DAhNALLDIQSSGR-A0A024QYX7-H3zsw-TMT	1.104	0.887	1.119	1.093	1.106	1.201	1.203	1.119	1.2	1.11	1.284	1.165	1.02	0.982	1.45	1.276	1.265	1.068	1.283	1.204
AYhEQLTVAEITNAcFEPANQMVK-Q53GA7-H3zsw-TMT C15zsw-TMT	1.092	1.224	1.069	1.173	0.883	0.895	0.772	0.851	0.963	1.18	0.88	1.057	1.516	1.507	1.309	1.246	1.156	1.126	1.085	1.111
GEMMDLQhGSLFLR-P00338-H8zsw-TMT	1.033	1.125	1.228	1.188	0.949	0.933	0.949	0.961	0.934	0.869	1.026	0.992	0.899	0.974	1.137	0.932	1.17	1.162	1.101	1.106
YKPAVNQIEchPYLTQEK-P15121-C10zsw-TMT H11zsw-TMT	1.404	1.211	1.071	0.665	0.204	0.247	0.181	0.209	0.451	0.485	0.508	0.111	0.373	0.305	0.378	0.0315	0.949	0.765	0.82	0.164
GEWIKPGAIVIDcGINYVPDDK-A0A024R652-C13zsw-TMT	0.0315	1.156	0.909	0.0315	0.0315	0.949	0.96	0.0315	0.0315	1.175	1.206	0.0315	0.0315	1.2	0.993	0.0315	0.0315	1.198	1.135	0.0315
EVcGFAPYER-Q9Y3U8-C3zsw-TMT	1.015	0.987	0.897	0.731	0.829	0.902	0.898	0.741	0.755	0.79	0.729	0.698	0.85	0.89	0.957	0.791	0.718	0.774	0.68	0.661
ILTDYGFEGhPFR-Q9UF24-H10zsw-TMT	0.0315	0.933	0.658	0.0315	0.0315	0.932	0.919	0.0315	0.0315	1.136	1.265	0.0315	0.0315	0.877	0.969	0.0315	0.0315	0.715	0.896	0.0315
YEQGTGcWQGPNR-A0A024R7F1-C7zsw-TMT	0.902	0.888	1.052	0.523	1.26	1.16	1.091	1.034	1.155	1.081	0.962	0.525	1.037	0.972	0.961	1.039	1.115	1.023	0.957	1.026
VVYENAYGQFIGPhR-E9PIR7-H14zsw-TMT	0.953	0.601	0.0315	0.757	0.795	0.635	0.0315	0.668	0.715	0.506	0.0315	0.733	0.704	0.44	0.0315	0.796	1.044	0.755	0.0315	1.197
ITAFVPNDGcLNFIEENDEVLVAGFGR-P62266-C10zsw-TMT	0.0315	1.275	0.0315	0.959	0.0315	1.416	0.0315	1.653	0.0315	1.05	0.0315	1.295	0.0315	1.226	0.0315	1.179	0.0315	1.285	0.0315	1.383
LLYDLADQLhAAVGASR-P13804-H10zsw-TMT	0.0315	0.0315	1.111	0.915	0.0315	0.0315	0.69	0.762	0.0315	0.0315	0.932	0.815	0.0315	0.0315	0.992	0.879	0.0315	0.0315	0.78	0.723
AIANEcQAN-P55072-C6zsw-TMT	1.046	0.92	0.685	1.035	1.104	1.109	0.753	1.219	0.894	0.964	0.977	0.894	1.124	1.113	1.369	1.166	1.051	1.074	1.213	1.149
MEDSVGcLETAEEVK-P35579-C7zsw-TMT	1.006	1.002	0.838	0.924	0.989	0.855	0.643	0.784	1.053	1.221	1.024	1.384	1.045	1.217	1.232	1.257	0.946	1.137	0.912	1.103
YYGGAEVVDEIELLcQR-A0A024RB99-C15zsw-TMT	0.0315	1.083	1.333	0.942	0.0315	0.99	1.083	0.801	0.0315	0.774	0.856	0.616	0.0315	0.749	0.8	0.409	0.0315	0.809	0.789	0.255
VDEAVAVLQAhQAK-A0A087WTT1-H11zsw-TMT	0.857	0.929	0.901	0.0315	1.175	1.244	1.022	0.0315	1.284	1.376	1.156	0.0315	0.959	1.125	1.056	0.0315	1.044	1.172	1.112	0.0315
LDSVESVLPYEYTAFDFcQASEGK-B3KSG9-C18zsw-TMT	0.0315	0.96	0.0315	1.115	0.0315	1.451	0.0315	1.441	0.0315	0.902	0.0315	0.947	0.0315	0.878	0.0315	0.663	0.0315	1.679	0.0315	1.222
NIIhGSDSVESAEK-P15531-H4zsw-TMT	0.852	1.048	0.969	0.994	1.57	1.359	1.292	1.287	1.9	1.502	2.171	1.729	1.223	0.96	2.642	1.351	1.421	1.366	2.667	1.418
YKPVTNQVEchPYLTQEK-O60218-C10zsw-TMT H11zsw-TMT	1.516	1.807	1.745	1.809	0.153	0.207	0.22	0.387	0.32	0.295	0.311	0.449	0.161	0.305	0.262	0.386	0.299	0.323	0.267	0.379
SLDQTDMhGDSEYNIMFGPDIcGPGTK-P27797-H8zsw-TMT C22Carboxymethyl	0.0315	0.0315	1.397	0.993	0.0315	0.0315	2.084	1.495	0.0315	0.0315	2.402	1.809	0.0315	0.0315	1.196	0.964	0.0315	0.0315	1.901	1.277
FLAAGThLGGTNLDFQMEQYIYK-C9J9K3-H7zsw-TMT	0.791	0.877	1.007	1.067	0.788	0.882	0.872	0.954	1.028	0.98	0.894	0.991	1.208	1.066	0.967	1.239	0.924	0.9	0.759	0.856
NEAESCDCLQGFQLThSLGGGTGSGMGTLLISK-M0QYM7-H16zsw-TMT	0.657	1.037	0.633	1.024	0.978	1.213	1.12	1.008	1.222	1.329	1.015	1.224	0.996	1.015	0.711	0.779	1.281	1.314	1.006	1.176
IGYNPATVPFVPISGWhGDNMLEPSPNMPWFK-Q05639-H17zsw-TMT	1.091	0.0315	0.0315	0.906	0.678	0.0315	0.0315	0.729	0.689	0.0315	0.0315	0.451	1.413	0.0315	0.0315	1.422	0.856	0.0315	0.0315	0.801
YTVQDESHSEWVScVR-P63244-C14zsw-TMT	1.067	0.0315	1.195	1.088	1.107	0.0315	1.005	1.13	1.162	0.0315	1.109	1.071	1.19	0.0315	1.229	1.113	0.982	0.0315	0.999	0.762
FLAAGThLGGTNLDFQMEQY-C9J9K3-H7zsw-TMT	1.086	1.148	0.0315	0.0315	1.012	1.078	0.0315	0.0315	1.009	1.208	0.0315	0.0315	1.127	1.327	0.0315	0.0315	1.276	1.271	0.0315	0.0315
TIGGGDDSFTTFFcETGAGK-P68366-C14zsw-TMT	1.002	0.0315	0.0315	1.128	0.701	0.0315	0.0315	0.77	0.804	0.0315	0.0315	0.753	0.963	0.0315	0.0315	1.024	1.014	0.0315	0.0315	1.016
LYSNAYLNDLAGcIK-P00352-C13zsw-TMT	1.245	1.219	1.117	1.395	0.631	0.649	0.585	0.608	0.529	0.637	0.665	0.679	0.534	0.636	0.548	0.795	0.514	0.622	0.531	0.596
DYGVYLEDSGhTLR-Q13162-H11zsw-TMT	0.88	0.916	0.813	0.524	1.404	1.301	1.281	1.122	2.12	1.643	2.027	1.33	2.074	1.574	2.074	1.276	2.01	1.627	1.618	1.329
FAQhGTFEYEYSQR-Q9BSV4-H4zsw-TMT	1.064	1.048	0.0315	1.147	0.885	0.995	0.0315	0.977	1.067	0.894	0.0315	1.016	1.013	0.926	0.0315	0.89	0.877	1.002	0.0315	1.354
IQPGSQQADFLDALIVSmDVIQhETIGK-P13010-M18Oxidation H23zsw-TMT	0.978	1.076	1.161	0.0315	1.585	1.662	0.998	0.0315	1.01	0.77	1.115	0.0315	1.378	0.738	0.73	0.0315	1.431	1.252	1.246	0.0315
AEGSDVANAVLDGADcIMLSGETAK-P14618-C16zsw-TMT	1.323	1.017	0.93	1.177	0.57	0.403	0.371	0.545	0.479	0.139	0.207	0.532	0.701	0.404	0.0315	0.653	1.23	0.455	0.0315	1.066
VLAVNQENEhLMEDYEK-O43707-H10zsw-TMT	0.766	0.901	0.837	0.914	1.06	1.202	1.344	1.435	1.184	1.094	1.299	1.215	0.826	0.899	0.944	0.933	1.257	1.451	1.548	1.527
VPADTEVVcAPPTAYIDFAR-V9HWK1-C9zsw-TMT	1.175	0.0315	0.0315	1.437	0.967	0.0315	0.0315	0.973	0.93	0.0315	0.0315	0.946	1.062	0.0315	0.0315	1.162	1.254	0.0315	0.0315	1.348
TcGFDFTGAVEDISK-A0A024R6W0-C2zsw-TMT	0.939	1.048	1.026	1.085	0.856	0.765	0.829	0.923	0.734	0.877	0.871	0.993	1.118	1.286	0.94	1.18	0.606	0.863	0.77	0.777
hFYWYLTNEGIQYLR-P46783-H1zsw-TMT	0.858	1.095	1.03	1.158	1.205	1.063	0.967	0.921	1.386	1.273	1.094	1.093	1.176	1.161	1.074	1.193	0.676	0.879	0.847	0.842
EESGKPGAhVTVK-P22626-H9zsw-TMT	0.756	0.915	0.663	0.945	1.664	1.243	0.801	1.479	1.895	1.425	0.646	1.787	1.017	1.025	0.264	1.073	1.568	1.31	0.0315	1.391
EhFQDDVFNEK-P43490-H2zsw-TMT	0.912	0.98	0.999	1.035	0.479	0.451	0.448	0.498	0.516	0.542	0.52	0.486	0.415	0.419	0.483	0.545	0.552	0.44	0.545	0.415
LTEGLHGFHVhEFGDNTAGcTSAGPHFNPLSR-P00441-H11zsw-TMT C20Carboxymethyl	1.068	1.303	0.0315	0.0315	0.636	0.803	0.0315	0.0315	0.839	1.013	0.0315	0.0315	0.988	1.381	0.0315	0.0315	0.925	0.975	0.0315	0.0315
LLQDhPWLLSQNLVVKPDQLIK-A0A024R1Y2-H5zsw-TMT	1.156	0.855	1.093	0.0315	0.917	0.846	0.829	0.0315	1.103	1.154	0.889	0.0315	1.156	1.14	1.229	0.0315	0.765	0.978	1.021	0.0315
GhVTQDAPIPGSPLYTIK-Q8IXJ3-H2zsw-TMT	0.882	0.924	1.177	0.65	1.135	1.087	1.584	1.274	1.167	1.249	1.802	1.301	0.912	0.934	1.705	1.185	1.368	1.261	2.04	1.083
GVNWAAFhPTMPLIVSGADDR-P53621-H8zsw-TMT	0.0315	1.074	0.986	0.991	0.0315	0.748	0.821	0.855	0.0315	0.977	0.948	0.946	0.0315	1.206	1.231	1.168	0.0315	1.127	0.766	0.926
AEQPDGLILGMGGQTALNcGVELFK-A8K134-C19zsw-TMT	0.0315	0.0315	1.015	0.934	0.0315	0.0315	1.202	1.45	0.0315	0.0315	0.988	1.071	0.0315	0.0315	1.758	1.766	0.0315	0.0315	3.47	3.35
QQhVIETLIGK-B4DDU6-H3zsw-TMT	0.965	1.161	1.014	0.976	0.907	1.047	1.048	1.081	0.935	1.029	0.974	0.956	0.905	1.006	1.083	0.914	0.895	1.09	1.023	0.999
ScAHDWVYE-Q32Q12-C2zsw-TMT	0.0315	1.098	0.0315	1.113	0.0315	0.781	0.571	0.626	0.0315	0.657	0.597	0.561	0.0315	0.741	1.807	2.027	0.0315	0.959	3.313	1.951
VMTIPYQPMPASSPVIcAGGQDR-Q15365-C17zsw-TMT	1.262	0.0315	1.002	0.789	1.091	0.0315	0.938	0.97	1.379	0.0315	1.006	1.143	1.394	0.0315	1.203	1.079	1.382	0.0315	1.263	1.459
VVDLMAhM-P04406-H7zsw-TMT	0.0315	1.108	1.175	1.027	0.0315	0.868	0.933	0.937	0.0315	0.755	0.821	0.813	0.0315	1.069	1.3	1.36	0.0315	0.889	1.123	1.121
EGcEAIVDTGTSLMVGPVDEVR-H7C469-C3zsw-TMT	0.839	1.165	0.0315	0.0315	0.942	1.01	0.0315	0.0315	0.879	1.009	0.0315	0.0315	1.061	1.163	0.0315	0.0315	1.022	0.964	0.0315	0.0315
hVLVTLGEK-G8JLA2-H1zsw-TMT	0.0315	0.868	0.988	0.611	0.0315	1.08	1.149	0.783	0.0315	1.13	1.326	0.567	0.0315	1.171	1.311	0.47	0.0315	1.194	1.29	1.157
TFVVQGFGNVGLhSMR-B4DMF5-H13zsw-TMT	1.199	1.039	1.054	1.245	1.299	1.117	1.194	1.437	2.445	1.981	2.783	3.145	0.983	1.267	0.831	0.977	0.877	0.927	0.788	0.986
TThFVEGGDAGNR-P18124-H3zsw-TMT	0.0315	0.63	0.0315	1.084	0.0315	1.726	0.0315	1.348	0.0315	1.023	0.0315	0.92	0.0315	0.943	0.0315	2.011	0.0315	1.024	0.0315	1.2
HLEINPDhSIIETLR-P07900-H8zsw-TMT	0.879	0.973	0.89	0.911	0.744	0.713	0.852	0.976	0.914	0.781	1.095	1.146	1.084	1.08	1.319	1.549	0.853	0.927	1.011	1.029
hFILDEcDK-Q13838-H1zsw-TMT C7zsw-TMT	1.002	1.082	1.118	0.98	0.908	0.982	0.891	0.86	0.877	1.005	0.939	0.847	0.973	1.241	1.275	1.157	0.933	0.981	0.934	0.817
SIYFQPPSFYVSAQDLPhIENGGVAVLTGK-O95831-H18zsw-TMT	0.0315	0.0315	0.913	1.004	0.0315	0.0315	1.013	1.31	0.0315	0.0315	1.029	0.932	0.0315	0.0315	0.857	0.861	0.0315	0.0315	0.752	0.948
YADLTEDQLPScESLK-P18669-C12zsw-TMT	1.17	1.421	1.132	1.12	0.9	1.068	0.948	0.917	0.967	1.219	1.088	1.069	1.102	1.137	1.025	1.047	1.142	1.314	1.054	1.176
EhPWEVMPDLYF-C9J9K3-H2zsw-TMT	1.236	1.12	1.214	0.829	1.124	1.062	1.16	1.003	0.852	0.88	1.148	0.829	0.988	1.169	1.153	1.131	0.932	0.956	1.208	0.88
DVQIGDIVTVGEcR-P62280-C13zsw-TMT	1.186	1.372	0.0315	1.236	0.788	0.874	0.0315	0.731	1.082	0.9	0.0315	0.908	1.076	1.148	0.0315	1.257	0.953	0.979	0.0315	0.901
ALANSLAcQGK-P04075-C8zsw-TMT	1.241	0.0315	1.302	1.427	0.779	0.0315	1.096	1.051	0.828	0.0315	1.095	1.198	0.912	0.0315	1.106	1.192	1.244	0.0315	1.513	1.691
VFImDScDELIPEYLNFIR-P08238-M4Oxidation C7zsw-TMT	0.934	1.059	0.931	0.818	1.179	0.982	1.153	1.197	0.847	0.572	0.778	0.805	1.267	1.132	1.05	1.111	1.39	1.366	1.01	1.16
GFQQILAGEYDhLPEQAFYMVGPIEEAVAK-P06576-H12zsw-TMT	0.972	0.634	0.773	0.889	2.197	1.506	1.794	1.894	1.314	1.024	1.213	1.144	0.958	0.601	1.261	0.71	1.099	0.748	0.862	1.061
FIQENIFGIcPhMTEDNKDLIQGK-P30101-C10zsw-TMT H12zsw-TMT	0.972	0.987	0.969	0.951	1.236	1.418	1.151	1.255	1.158	1.234	1.259	1.242	0.926	1.037	0.814	1.012	0.833	0.979	0.917	0.802
GNFGGSFAGSFGGAGGhAPGVAR-A0A087X0X3-H17zsw-TMT	1.073	0.0315	0.0315	0.998	1.809	0.0315	0.0315	0.894	1.773	0.0315	0.0315	0.86	1.193	0.0315	0.0315	0.792	1.378	0.0315	0.0315	0.636
GTADVThDLQEMK-B3KVN0-H7zsw-TMT	0.851	0.838	0.923	0.929	1.329	1.223	1.226	1.289	1.504	1.518	1.601	1.463	0.919	0.977	1.015	1.102	1.202	1.2	1.304	1.265
YQEGGVESAFhK-B2R9S4-H11zsw-TMT	0.874	0.783	0.0315	0.0315	0.653	0.613	0.0315	0.0315	0.756	0.622	0.0315	0.0315	0.73	0.7	0.0315	0.0315	0.699	0.713	0.0315	0.0315
TGQATVASGIPAGWMGLDcGPESSK-P00558-C19zsw-TMT	1.373	1.51	1.335	1.436	0.705	0.77	0.739	0.851	0.927	0.857	0.911	0.933	0.972	0.957	0.889	1.045	1.032	0.985	0.916	0.978
ALGVSNFShFQIEK-O60218-H9zsw-TMT	1.055	1.07	1.363	0.949	0.508	0.396	0.074	0.354	0.582	0.382	0.21	0.466	0.648	0.477	0.231	0.538	0.646	0.44	0.241	0.516
MFQYDSThGK-P04406-H8zsw-TMT	0.84	0.987	0.869	0.857	0.884	0.826	0.835	0.859	0.684	0.709	0.743	0.573	1.284	1.187	1.175	0.987	1.2	1.095	1.129	0.825
PVIcATQMLESMIK-P14618-C4zsw-TMT	1.248	1.27	1.351	1.442	0.702	0.706	0.585	0.559	0.712	0.759	0.701	0.682	0.949	0.974	1.029	0.839	0.834	0.931	0.798	0.783
SIQFVDWcPTGF-P68366-C8zsw-TMT	1.322	1.04	0.0315	0.0315	1.317	1.006	0.0315	0.0315	0.744	0.869	0.0315	0.0315	1.069	0.879	0.0315	0.0315	1.144	1.203	0.0315	0.0315
WMEAcLGEDLPPTTELEEGLR-A4QPB0-C5zsw-TMT	0.0315	0.0315	0.846	1.075	0.0315	0.0315	0.828	0.813	0.0315	0.0315	0.651	0.844	0.0315	0.0315	0.737	1.139	0.0315	0.0315	0.803	0.805
ESVLIISTDPAhNISDAFDQK-K7ERW9-H12zsw-TMT	0.0315	1.1	0.0315	1.066	0.0315	0.813	0.0315	0.992	0.0315	0.876	0.0315	1.298	0.0315	1.074	0.0315	1.256	0.0315	1.65	0.0315	1.477
GQGVYLGmPGcLPVYDALAGEFIR-P30040-M8Oxidation C11zsw-TMT	0.774	0.906	1.007	1.051	1.3	1.465	1.223	1.365	1.059	1.006	1.123	1.205	0.995	0.853	0.648	0.817	0.832	1.339	0.966	0.962
GEVPcTVTSASPLEEATLSELK-H7C068-C5zsw-TMT	0.0315	0.0315	0.993	0.957	0.0315	0.0315	0.797	0.765	0.0315	0.0315	0.998	0.997	0.0315	0.0315	0.801	0.971	0.0315	0.0315	0.932	0.888
NLhYFNSDSFAShPNYPYSDEY-S4R3Z2-H3zsw-TMT H13zsw-TMT	1.411	0.0315	1.366	0.0315	0.394	0.0315	0.453	0.0315	1.068	0.0315	1.048	0.0315	0.592	0.0315	0.551	0.0315	1.466	0.0315	1.271	0.0315
LEDLVcDVVDR-B4DN60-C6zsw-TMT	1.145	0.0315	1.011	1.036	0.816	0.0315	0.7	0.793	0.871	0.0315	0.931	0.975	1.077	0.0315	1.048	1.135	0.914	0.0315	0.897	0.896
LTESPcALVASQYGWSGNMER-Q5CAQ5-C6zsw-TMT	1.036	0.939	0.999	1.006	1.026	1.154	1.051	1.153	1.154	1.287	1.261	1.217	1.086	1.383	0.979	1.011	1.027	1.096	1.056	1.094
AFThTAQYDEAISDYFR-B2R7P8-H4zsw-TMT	0.687	0.657	1.074	0.789	0.75	0.604	0.969	0.878	1.075	0.917	1.111	1.141	0.968	0.723	1.111	1.091	0.614	0.77	0.727	0.803
LGETYKDhENIVIAK-P07237-H8zsw-TMT	0.746	0.753	0.922	1.016	1.304	1.431	1.52	1.814	1.456	1.67	1.86	2.004	0.625	0.681	0.889	0.828	0.882	1.19	1.333	1.309
SALSGhLETVILGLLK-P07355-H6zsw-TMT	0.923	1.047	1	1.113	0.71	0.918	0.711	0.66	0.521	0.641	0.659	0.625	0.854	1.007	1.025	1.162	0.738	0.951	0.924	0.876
ETGANLAIcQWGFDDEANHLLLQNNLPAVR-B4DDU6-C9zsw-TMT	1.023	0.67	0.931	1.194	0.694	0.594	0.398	0.798	0.704	0.314	0.211	0.728	0.828	0.237	0.0315	1.049	0.923	0.0315	0.374	0.927
LIQEQEQELVGALAADLhK-C9JMC5-H18zsw-TMT	1.114	0.877	0.0315	1.231	0.724	0.498	0.0315	0.548	0.929	0.574	0.0315	0.778	1.169	0.661	0.0315	0.724	1.2	0.565	0.0315	0.706
GDLEEYGQDLLhTVFK-P43490-H12zsw-TMT	0.971	1.027	1.056	1.376	0.644	0.487	0.621	0.662	0.656	0.531	0.613	0.699	0.558	0.573	0.643	0.642	0.603	0.627	0.736	0.655
VVQVSAGDShTAALTDDGR-C9JRH2-H10zsw-TMT	0.0315	0.888	0.0315	0.729	0.0315	1.612	0.0315	1.514	0.0315	1.337	0.0315	1.793	0.0315	1.507	0.0315	1.343	0.0315	0.96	0.0315	1.267
IVGSEhYDVAR-P06576-H6zsw-TMT	1.139	0.881	0.837	0.949	1.151	1.729	1.947	1.209	1.315	2.053	2.282	1.077	0.86	0.944	1.313	0.826	0.853	1.188	1.304	0.732
ELGSEcGIEFDEEK-A0A0C4DGS1-C6zsw-TMT	0.0315	0.847	0.0315	1.01	0.0315	1.08	0.0315	1.305	0.0315	0.942	0.0315	1.157	0.0315	0.813	0.0315	1.031	0.0315	0.715	0.0315	1.007
DIcNDVLSLLEK-P63104-C3zsw-TMT	1.021	1.099	1.043	0.955	0.621	0.608	0.638	0.583	0.425	0.391	0.363	0.301	0.702	0.744	0.744	0.68	0.816	0.723	0.749	0.688
SEPDDSDPFSFDGPEIMGcTGcQIDWK-F8VY35-C19zsw-TMT C22zsw-TMT	0.0315	0.0315	1.37	1.305	0.0315	0.0315	0.465	0.449	0.0315	0.0315	0.434	0.363	0.0315	0.0315	0.627	0.657	0.0315	0.0315	0.858	0.907
hIEIFTDLSSR-P13010-H1zsw-TMT	0.0315	0.0315	0.964	0.733	0.0315	0.0315	1.045	1.065	0.0315	0.0315	0.984	1.118	0.0315	0.0315	1.035	1.082	0.0315	0.0315	0.81	0.869
IIPTLEEGLQLPSPTATSQLPLESDAVEcLNYQHYK-P61978-C29zsw-TMT	0.0315	1.028	0.0315	1.051	0.0315	0.932	0.0315	1.004	0.0315	0.551	0.0315	0.277	0.0315	1.193	0.0315	0.812	0.0315	1.349	0.0315	0.709
VIhDNFGIVEGLMTTVHAITATQK-P04406-H3zsw-TMT	1.055	1.245	1.245	1.17	0.808	0.75	0.537	0.635	0.667	0.707	0.633	0.596	0.919	1.011	0.745	0.842	0.671	0.66	0.567	0.625
LYQQhGAGLFDVTR-B4DE89-H5zsw-TMT	0.767	0.893	0.0315	0.0315	1.203	1.622	0.0315	0.0315	1.196	1.396	0.0315	0.0315	0.966	1.012	0.0315	0.0315	0.901	1.219	0.0315	0.0315
LFGNMEGDcPSDWK-A8K6Q8-C9zsw-TMT	0.823	0.884	0.0315	0.958	0.846	0.845	0.0315	1	1.069	0.901	0.0315	0.986	1.142	1.049	0.0315	1.202	0.723	0.643	0.0315	0.895
KDDEENYLDLFShK-B4E043-H13zsw-TMT	0.0315	1.185	1.168	1.188	0.0315	0.989	0.956	0.927	0.0315	1.084	1.139	1.181	0.0315	1.098	1.061	1.194	0.0315	0.944	1.019	1.121
EDLNcQEEEDPMNK-K7EL20-C5zsw-TMT	0.868	1	0.898	1.026	1.183	1.265	1.2	1.451	1.148	1.149	1.07	1.258	1.096	1.154	1.096	1.19	1.338	1.346	1.029	1.312
TGVHHYSGNNIELGTAcGK-P62888-C17zsw-TMT	0.865	1.044	1.231	0.0315	1.222	0.944	0.953	0.0315	0.991	1.203	1.056	0.0315	1.01	0.887	1.28	0.0315	1.125	1.241	0.971	0.0315
TVFAEhISDEcK-P39023-H6zsw-TMT C11zsw-TMT	0.936	0.0315	1.027	1.029	0.755	0.0315	0.798	0.72	0.876	0.0315	0.716	0.739	1.078	0.0315	1.162	1.14	0.76	0.0315	0.739	0.739
TLVcSSAPGPLELDLTGDLESFK-J3KTF8-C4zsw-TMT	0.0315	1.23	1.032	0.0315	0.0315	0.767	0.766	0.0315	0.0315	0.65	0.741	0.0315	0.0315	0.924	0.819	0.0315	0.0315	1.134	0.852	0.0315
HIDcAYVYQNEHEVGEAIQEK-O60218-C4zsw-TMT	1.733	1.691	1.747	1.709	0.357	0.326	0.344	0.386	0.429	0.404	0.399	0.453	0.46	0.381	0.437	0.401	0.436	0.386	0.454	0.356
FENAFLShVVSQHQALLGTIR-P25705-H8zsw-TMT	1.084	1.089	1.091	1.177	0.928	0.951	0.936	0.941	1.396	1.416	1.359	1.423	1.378	1.274	1.157	1.124	0.892	1.023	0.936	0.938
DPEEADYcIQTLDGR-B4DRS4-C8zsw-TMT	0.0315	1.075	0.958	1.183	0.0315	0.769	0.832	0.875	0.0315	1.027	0.907	1.11	0.0315	1.002	0.782	0.953	0.0315	0.857	0.825	0.926
IGAEVYhNLK-P06733-H7zsw-TMT	0.994	1.013	1.319	0.853	1.234	1.203	1.393	1.114	1.426	1.297	1.63	1.252	1.712	1.683	1.884	1.684	1.637	1.739	1.798	1.648
DAPEEEDhVLVLR-P07237-H8zsw-TMT	0.911	0.851	1.076	0.98	1.082	1.169	1.877	0.965	1.035	1.942	2.544	1.13	0.831	0.524	0.891	0.886	0.798	0.873	1.297	1.08
ILATGANVILTTGGIDDMcLK-P17987-C19zsw-TMT	1.014	0.921	1.102	0.995	0.938	0.733	0.71	0.818	0.901	0.938	0.914	0.906	1.217	1.029	1.17	1.095	1.014	0.897	0.928	0.883
VIISAPSADAPmFVMGVNhEK-P04406-M12Oxidation H19zsw-TMT	1.371	1.127	0.0315	1.028	1.003	0.807	0.0315	0.986	1.107	0.902	0.0315	1.034	1.137	1.221	0.0315	1.279	1.334	1.124	0.0315	1.132
IAVAAQNcYK-V9HWK1-C8zsw-TMT	1.014	0.0315	1.322	0.892	0.997	0.0315	1.317	1.075	0.994	0.0315	1.233	1.091	1.022	0.0315	1.454	1.254	1.135	0.0315	1.757	1.415
ELQELVQYPVEhPDK-P55072-H12zsw-TMT	0.921	0.97	0.825	0.951	1.396	1.355	1.385	1.332	1.106	1.321	1.266	1.539	1.021	1.059	1.082	1.072	0.937	1.109	0.917	1.09
STAPETAIEcTQAPAPASEDEK-B3KY63-C10zsw-TMT	0.796	1.06	0.891	0.636	1.307	1.069	1.229	1.497	1.354	1.328	1.115	1.254	0.84	0.927	0.705	0.633	1.165	1.286	1.04	0.99
YhTSQSGDEMTSLSEYVSR-P08238-H2zsw-TMT	0.749	0.715	0.853	0.915	1.252	0.955	0.953	1.028	1.546	1.282	1.443	1.428	1.559	0.873	1.41	1.44	0.789	0.798	0.987	0.925
HIDcAHVYQNENEVGVAIQEK-P15121-C4zsw-TMT	1.487	1.328	0.0315	0.0315	0.661	0.598	0.0315	0.0315	0.653	0.694	0.0315	0.0315	0.682	0.749	0.0315	0.0315	0.833	0.867	0.0315	0.0315
GPFVEAEVPDVDLEcPDAK-Q09666-C15zsw-TMT	1.23	1.304	1.059	1.324	1.031	0.97	0.919	0.96	0.984	1.009	0.987	0.919	1.083	1.106	1.006	1.151	1.55	1.351	1.515	1.798
NAFAcFDEEATGTIQEDYLR-P19105-C5zsw-TMT	0.953	0.0315	0.769	0.791	0.976	0.0315	0.762	0.758	0.804	0.0315	0.408	0.981	0.99	0.0315	0.435	0.927	0.924	0.0315	0.269	0.946
AVTLhDQGTAQWADLSSQFYLR-P22314-H5zsw-TMT	1.034	0.851	1.029	1.152	0.736	0.833	0.837	0.852	0.951	0.814	0.866	1.026	1.272	1.05	1.113	1.017	0.897	0.804	0.896	0.869
hFSGLEEAVYR-P50990-H1zsw-TMT	1.002	1.144	1.059	0.856	1.106	1.006	1.013	0.964	0.924	0.802	0.867	0.94	1.032	0.963	1.084	0.997	1.067	0.876	0.971	0.887
SEEAHAEDSVMDhHFR-Q5VU21-H13zsw-TMT	0.815	0.0315	0.765	0.0315	1.152	0.0315	1.395	0.0315	1.299	0.0315	1.35	0.0315	1.2	0.0315	1.431	0.0315	1.478	0.0315	1.422	0.0315
ISSDLDGhPVPK-B4E022-H8zsw-TMT	0.984	0.982	0.863	0.924	0.793	0.935	0.899	0.78	0.857	0.85	0.784	0.846	0.808	0.972	0.842	0.79	1.892	1.172	1.133	1.006
GFQQILAGEYDhLPEQAFY-P06576-H12zsw-TMT	1.097	1.251	0.67	1.335	1.382	1.501	0.612	1.094	1.412	1.543	0.814	1.328	1.012	1.104	0.671	1.056	1.591	1.952	1.325	1.405
LYQTDPSGTYhAWK-Q05DH1-H11zsw-TMT	0.785	0.836	0.784	1.024	1.195	1.286	1.378	1.391	1.11	1.27	1.14	1.25	0.995	1.017	0.937	1.232	1.179	1.258	1.394	1.406
GLPQLGTLGAGNhYAEIQVVDEIFNEYAAK-Q9Y3I0-H13zsw-TMT	0.887	1.612	0.0315	0.0315	1.309	1.685	0.0315	0.0315	0.938	1.005	0.0315	0.0315	0.992	0.919	0.0315	0.0315	1.096	1.017	0.0315	0.0315
LQFHDVAGDIFhQQCk-Q2VF42-H12zsw-TMT K16zsw-TMT	1.37	0.0315	1.569	0.0315	0.64	0.0315	0.548	0.0315	0.636	0.0315	0.644	0.0315	0.593	0.0315	0.544	0.0315	0.577	0.0315	0.552	0.0315
TSFVNFTDIcK-B5BU01-C10zsw-TMT	0.0315	1.076	1.168	1.071	0.0315	0.806	0.839	0.782	0.0315	0.991	0.994	0.87	0.0315	1.088	1.256	1.072	0.0315	0.84	0.928	0.759
SYPLVcIAK-P23141-C6zsw-TMT	0.885	1.123	1.118	1.181	0.961	0.846	0.961	0.988	1.181	1.13	1.236	1.207	1.087	1.171	1.081	1.167	0.926	1.054	0.976	1.074
EALLSSAVDhGSDEVK-P78371-H10zsw-TMT	0.947	0.823	1	0.987	1.225	1.157	1.307	1.182	1.224	1.31	1.204	1.257	1.224	1.37	1.522	1.442	1.453	1.361	1.375	1.37
DSNYhLLMSVQESLER-B4DMF5-H5zsw-TMT	1.095	1.084	0.0315	1.06	1.019	1.205	0.0315	1.126	1.137	1.4	0.0315	1.235	1.068	1.215	0.0315	0.868	0.916	1.193	0.0315	0.953
hGESAWNLENR-P18669-H1zsw-TMT	1.092	1.084	0.857	1.242	1.165	1.022	1.139	1.79	1.328	1.152	1.563	1.856	1.429	1.179	1.583	1.811	1.292	1.421	1.993	2.563
LSEcEEQAK-B2R5U1-C4zsw-TMT	1.097	0.0315	1.01	1.14	1.302	0.0315	1.487	1.294	1.196	0.0315	1.129	1.038	1.251	0.0315	1.181	1.414	0.935	0.0315	1.229	1.154
LFVALQGcMDK-P49748-C8zsw-TMT	0.0315	1.051	0.943	0.0315	0.0315	0.85	0.85	0.0315	0.0315	0.989	0.821	0.0315	0.0315	1.224	1.083	0.0315	0.0315	0.842	0.822	0.0315
hSGPNSADSANDGFVR-B4DKS8-H1zsw-TMT	0.0315	0.817	0.647	0.785	0.0315	1.518	1.777	1.71	0.0315	1.837	1.531	1.805	0.0315	0.949	0.809	0.96	0.0315	1.443	1.262	1.673
VcEEIAIIPSK-P08708-C2zsw-TMT	0.871	0.974	0.929	0.752	0.874	0.9	0.852	0.727	1.061	1.109	0.936	0.806	0.839	0.895	0.972	0.796	1.032	1.15	1.064	0.936
EAVcIVLSDDTcSDEK-P55072-C4zsw-TMT C12zsw-TMT	1.221	1.142	1.093	1.08	0.878	0.852	0.752	0.882	0.838	0.929	0.661	0.787	1.254	1.108	0.989	1.131	0.827	0.77	0.684	0.758
hTVNYGSDLTGGGDLFVGNEK-P35900-H1zsw-TMT	0.637	0.8	0.826	0.0315	0.28	0.315	0.349	0.0315	0.358	0.414	0.431	0.0315	0.338	0.424	0.491	0.0315	0.322	0.496	0.526	0.0315
EDIEFIcK-B7Z9L0-C7zsw-TMT	0.0315	1.027	0.998	0.0315	0.0315	0.865	0.999	0.0315	0.0315	0.756	0.867	0.0315	0.0315	0.991	1.256	0.0315	0.0315	0.711	0.987	0.0315
NVLLDPQLVPGGGASEMAVAhALTEK-B3KX11-H21zsw-TMT	0.846	0.0315	0.908	0.849	0.773	0.0315	0.726	0.843	0.706	0.0315	0.851	0.843	1.133	0.0315	1.02	1.102	1.189	0.0315	0.709	0.832
hEQILVLDPPTDLK-A8KA83-H1zsw-TMT	0.844	1.022	0.878	0.746	0.949	1.189	1.114	1.011	1.299	1.3	1.203	1.065	1.049	1.067	0.997	0.882	1.046	1.163	0.996	0.901
NLDcPELISEFMK-F8VNY3-C4zsw-TMT	0.0315	1.141	1.104	0.0315	0.0315	1.242	1.469	0.0315	0.0315	0.912	0.955	0.0315	0.0315	1.119	1.014	0.0315	0.0315	1.117	1.071	0.0315
VFDPScGLPYYWNADTDLVSWLSPHDPNSVVTK-Q4VY28-C6zsw-TMT	0.0315	0.0315	0.813	1.047	0.0315	0.0315	0.811	0.727	0.0315	0.0315	0.667	0.584	0.0315	0.0315	0.616	0.82	0.0315	0.0315	0.775	0.705
LEhEYIQNFK-Q15691-H3zsw-TMT	1.026	0.856	0.0315	0.0315	1.265	1.259	0.0315	0.0315	1.254	1.207	0.0315	0.0315	1.202	0.972	0.0315	0.0315	1.051	0.928	0.0315	0.0315
FDENDVITcFANFESDEVELSYAK-Q00839-C9zsw-TMT	0.859	0.597	0.978	1.29	1.67	1.659	2.009	2.303	0.838	0.676	0.862	0.634	0.514	0.55	0.865	0.659	1.508	1.339	1.706	1.021
VDSDDQWGEYScVFLPEPMGTANIQLHGPPR-A0A087X2B5-C12zsw-TMT	1.15	0.0315	1.286	0.0315	0.745	0.0315	0.792	0.0315	1.063	0.0315	0.925	0.0315	1.068	0.0315	0.782	0.0315	1.062	0.0315	0.92	0.0315
FGEENIEVYhSYFWPLEWTIPSR-E9PIR7-H10zsw-TMT	0.728	0.454	0.0315	0.584	0.65	0.411	0.0315	0.49	0.557	0.361	0.0315	0.444	0.517	0.264	0.0315	0.338	1.182	0.695	0.0315	0.951
FLEMcNDLLAR-B4DH02-C5zsw-TMT	0.0315	1.05	0.844	0.925	0.0315	1.087	0.977	0.941	0.0315	1.119	0.792	1.006	0.0315	0.981	0.975	0.976	0.0315	0.756	0.753	0.688
AITVFSPDGhLFQVEYAQEAVK-Q05DH1-H10zsw-TMT	1.163	0.0315	1.037	1.166	1.035	0.0315	1.085	0.891	1.179	0.0315	1.075	0.902	1.2	0.0315	1.121	1.075	1.088	0.0315	1.126	1.082
VFhLLGVDTLVVTNAAGGLNPK-P00491-H3zsw-TMT	0.778	0.958	0.0315	0.0315	0.808	0.822	0.0315	0.0315	1.53	1.468	0.0315	0.0315	0.87	0.918	0.0315	0.0315	0.884	1.016	0.0315	0.0315
VALSPQGTAQGELFLDDGhTFNYQTR-Q14697-H19zsw-TMT	1.186	0.99	0.879	1.265	1.413	1.52	1.419	1.63	1.604	1.83	1.699	1.777	0.911	1.103	0.871	1.364	1.511	1.525	1.235	1.441
hHSLGGQYGVQGFPTIK-Q15084-H1zsw-TMT	0.961	0.92	0.775	0.885	1.281	1.143	1.295	1.197	2.048	1.193	1.174	1.133	1.264	0.909	0.865	1.065	1.077	0.831	0.98	0.842
hVFGESDELIGQK-V9HWK1-H1zsw-TMT	0.843	0.0315	0.985	1.05	0.69	0.0315	0.696	0.888	0.664	0.0315	0.601	0.826	0.644	0.0315	0.548	0.862	0.677	0.0315	0.68	0.795
GNWGhLDQVAALR-P23141-H5zsw-TMT	0.85	0.895	0.829	0.686	0.685	0.407	0.454	0.318	0.995	0.97	1.034	0.798	0.582	0.382	0.378	0.338	0.512	0.52	0.417	0.377
FhSLSEK-P10599-H2zsw-TMT	0.641	0.0315	0.0315	0.67	0.55	0.0315	0.0315	0.535	0.627	0.0315	0.0315	0.498	0.672	0.0315	0.0315	0.592	1.093	0.0315	0.0315	0.959
